# Supplementary material
Source: Royal Society of Chemistry journal article supplement (doi:10.1039/d6dt00770h)

---

**Supporting Information**

(72 pages including the cover page)

***Cooperative Ruthenium Catalyst for Deaminative Coupling of  
Primary Amines to Symmetrical Secondary Amines***

*Sudhir Yadav, Vishal Chourasia, Prabodh Ranjan, Subhabrata De, Vitthal B. Saptal and Jitendra*

*K. Bera\**<sup>[a]</sup>

<sup>[a]</sup> Department of Chemistry and Center for Environmental Sciences and Engineering, Indian  
Institute of Technology Kanpur, Kanpur 208016, India

E-mail: [jbera@iitk.ac.in](mailto:jbera@iitk.ac.in), Fax: +91 512 2597436; Tel: + 91 512 2597336

\* To whom correspondence should be addressed.

---

**Contents**

|                                                                                | <b>Page</b>    |
|--------------------------------------------------------------------------------|----------------|
| <b>1. X-Ray Data Collection and Refinements Parameters for 1, 2, 3 &amp; 4</b> | <b>S3</b>      |
| <b>2. NMR Spectra of Metal Complexes</b>                                       | <b>S4-S11</b>  |
| <b>3. ESI-MS of Metal Complexes</b>                                            | <b>S12-S13</b> |
| <b>4. Qualitative Analysis of Ammonia Gas</b>                                  | <b>S14</b>     |
| <b>5. Coordinates of DFT Optimized Structures</b>                              | <b>S15-S44</b> |
| <b>6. Analytical Data of Secondary Amines</b>                                  | <b>S45-S49</b> |
| <b>7. <sup>1</sup>H and <sup>13</sup>C NMR Spectra of Secondary Amines</b>     | <b>S50-S72</b> |

## 1. X-Ray Data Collection and Refinements Parameters for Complexes 1, 2, 3 and 4.

| Table S1. Crystallographic Data and Refinement Parameters for Complexes 1, 2, 3 and 4.                                                                                                                                                                                                                                              |                                                                                   |                                                                                 |                                                                     |                                                                                   |
|-------------------------------------------------------------------------------------------------------------------------------------------------------------------------------------------------------------------------------------------------------------------------------------------------------------------------------------|-----------------------------------------------------------------------------------|---------------------------------------------------------------------------------|---------------------------------------------------------------------|-----------------------------------------------------------------------------------|
|                                                                                                                                                                                                                                                                                                                                     | 1.CH <sub>2</sub> Cl <sub>2</sub>                                                 | 2.Et <sub>2</sub> O                                                             | 3                                                                   | 4.CH <sub>2</sub> Cl <sub>2</sub>                                                 |
| Empirical formula                                                                                                                                                                                                                                                                                                                   | C <sub>53</sub> H <sub>49</sub> N <sub>4</sub> OP <sub>2</sub> Cl <sub>3</sub> Ru | C <sub>56</sub> H <sub>53</sub> N <sub>4</sub> O <sub>2</sub> P <sub>2</sub> Ru | C <sub>53</sub> H <sub>49</sub> N <sub>4</sub> OP <sub>2</sub> ClRu | C <sub>50</sub> H <sub>48</sub> N <sub>3</sub> OP <sub>2</sub> Cl <sub>3</sub> Ru |
| Formula Weight                                                                                                                                                                                                                                                                                                                      | 1027.32                                                                           | 977.03                                                                          | 956.42                                                              | 974.50                                                                            |
| Crystal System                                                                                                                                                                                                                                                                                                                      | Monoclinic                                                                        | Monoclinic                                                                      | Monoclinic                                                          | Triclinic                                                                         |
| Space Group                                                                                                                                                                                                                                                                                                                         | <i>P2<sub>1</sub>/n</i>                                                           | <i>C2/c</i>                                                                     | <i>P2<sub>1</sub>/n</i>                                             | <i>P<sub>1</sub></i>                                                              |
| a (Å)                                                                                                                                                                                                                                                                                                                               | 13.990(2)                                                                         | 40.571(2)                                                                       | 16.1059(9)                                                          | 10.3020(2)                                                                        |
| b (Å)                                                                                                                                                                                                                                                                                                                               | 20.087(3)                                                                         | 11.2694(5)                                                                      | 15.2451(7)                                                          | 14.3537(3)                                                                        |
| c (Å)                                                                                                                                                                                                                                                                                                                               | 19.489(3)                                                                         | 24.0395(11)                                                                     | 21.8945(11)                                                         | 17.0125(4)                                                                        |
| α (deg)                                                                                                                                                                                                                                                                                                                             | 90.00                                                                             | 90.00                                                                           | 90.00                                                               | 93.451(10)                                                                        |
| β (deg)                                                                                                                                                                                                                                                                                                                             | 102.038(3)                                                                        | 116.642(2)                                                                      | 103.724(2)                                                          | 104.760(10)                                                                       |
| γ (deg)                                                                                                                                                                                                                                                                                                                             | 90.00                                                                             | 90.00                                                                           | 90.00                                                               | 109.298(10)                                                                       |
| V (Å <sup>3</sup> )                                                                                                                                                                                                                                                                                                                 | 5356.3(15)                                                                        | 9824.2(8)                                                                       | 5222.4(5)                                                           | 2267.05(9)                                                                        |
| Z                                                                                                                                                                                                                                                                                                                                   | 4                                                                                 | 8                                                                               | 4                                                                   | 2                                                                                 |
| ρ <sub>calcd</sub> (g cm <sup>-3</sup> )                                                                                                                                                                                                                                                                                            | 1.274                                                                             | 1.322                                                                           | 1.216                                                               | 1.428                                                                             |
| μ (mm <sup>-1</sup> )                                                                                                                                                                                                                                                                                                               | 0.541                                                                             | 0.430                                                                           | 0.451                                                               | 0.631                                                                             |
| F(000)                                                                                                                                                                                                                                                                                                                              | 2112                                                                              | 4060                                                                            | 1976                                                                | 1002                                                                              |
| Reflections Collected                                                                                                                                                                                                                                                                                                               | 50434                                                                             | 56524                                                                           | 41318                                                               | 38910                                                                             |
| Independent                                                                                                                                                                                                                                                                                                                         | 13290                                                                             | 8373                                                                            | 9228                                                                | 11227                                                                             |
| Observed [I > 2σ(I)]                                                                                                                                                                                                                                                                                                                | 10072                                                                             | 6554                                                                            | 5834                                                                | 10285                                                                             |
| No. of variables                                                                                                                                                                                                                                                                                                                    | 584                                                                               | 589                                                                             | 590                                                                 | 574                                                                               |
| GooF                                                                                                                                                                                                                                                                                                                                | 1.044                                                                             | 1.035                                                                           | 1.032                                                               | 1.039                                                                             |
| R <sub>int</sub>                                                                                                                                                                                                                                                                                                                    | 0.0843                                                                            | 0.0665                                                                          | 0.0905                                                              | 0.0271                                                                            |
| Final R indices                                                                                                                                                                                                                                                                                                                     | R1 = 0.0677                                                                       | R1 = 0.0414                                                                     | R1 = 0.0575                                                         | R1 = 0.0308                                                                       |
| [I > 2σ(I)] <sup>a</sup>                                                                                                                                                                                                                                                                                                            | wR2 = 0.1671                                                                      | wR2 = 0.0965                                                                    | wR2 = 0.1135                                                        | wR2 = 0.0768                                                                      |
| R indices (all data) <sup>a</sup>                                                                                                                                                                                                                                                                                                   | R1 = 0.0891                                                                       | R1 = 0.0613                                                                     | R1 = 0.1062                                                         | R1 = 0.0347                                                                       |
|                                                                                                                                                                                                                                                                                                                                     | wR2 = 0.1780                                                                      | wR2 = 0.1042                                                                    | wR2 = 0.1283                                                        | wR2 = 0.0790                                                                      |
| <sup>a</sup> R <sub>1</sub> = Σ   F <sub>o</sub> -  F <sub>c</sub>    / Σ  F <sub>o</sub>   with F <sub>o</sub> <sup>2</sup> > 2σ(F <sub>o</sub> <sup>2</sup> ). wR <sub>2</sub> = [Σw( F <sub>o</sub> <sup>2</sup> -  F <sub>c</sub> <sup>2</sup>   ) <sup>2</sup> / Σ F <sub>o</sub> <sup>2</sup>   <sup>2</sup> ] <sup>1/2</sup> |                                                                                   |                                                                                 |                                                                     |                                                                                   |

## 2. NMR Spectra of Metal Complexes.

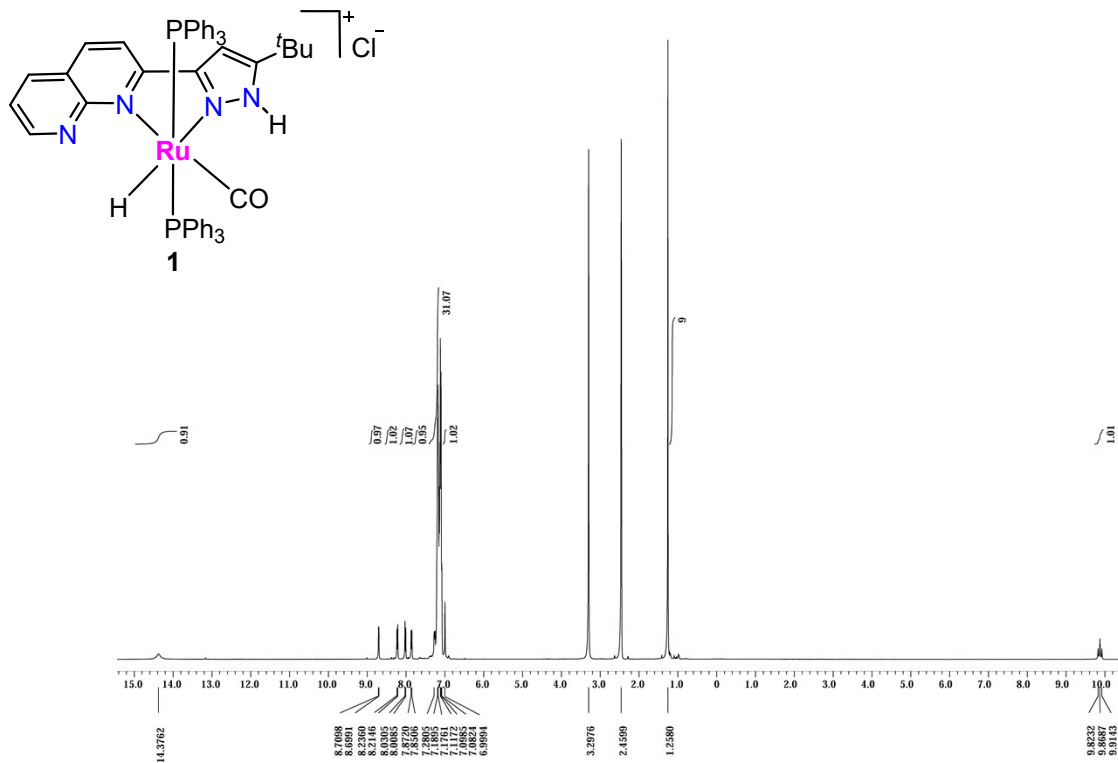Figure S1. <sup>1</sup>H NMR spectrum for **1** in DMSO-*d*<sub>6</sub>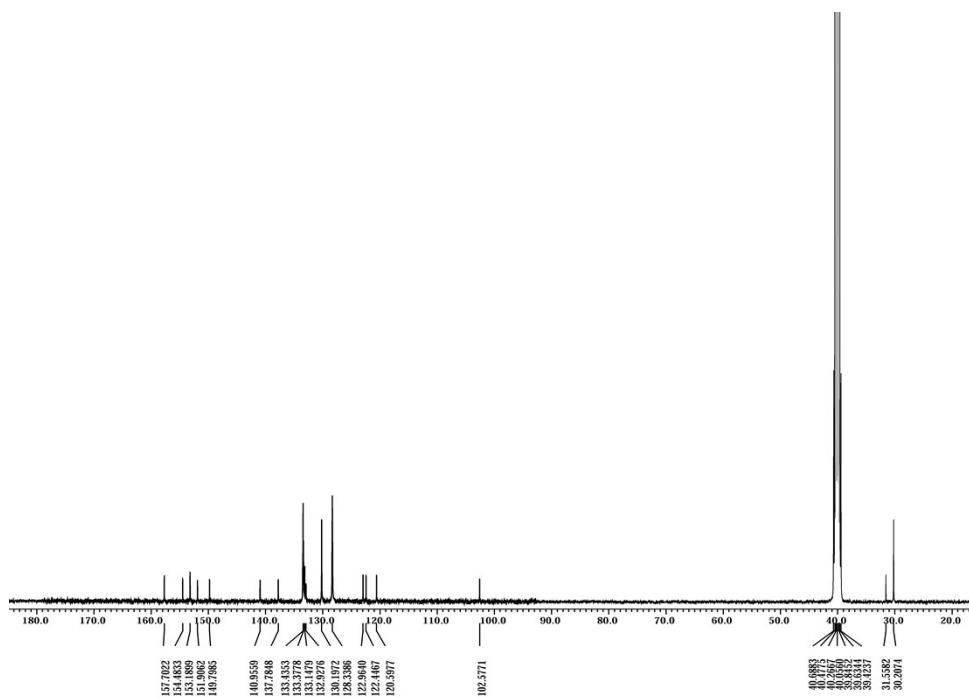Figure S2. <sup>13</sup>C NMR spectrum for **1** in DMSO-*d*<sub>6</sub>

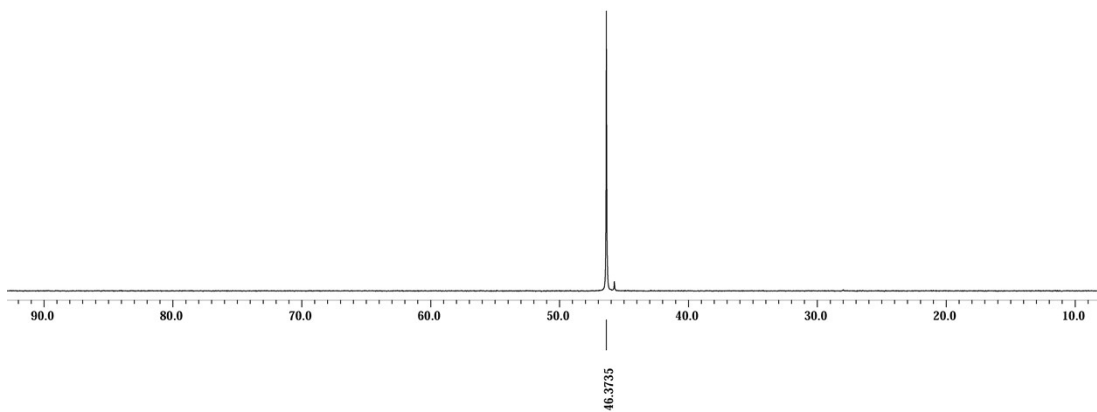

**Figure S3.**  $^{31}\text{P}\{\text{H}\}$  NMR spectrum for **1** in  $\text{DMSO-}d_6$

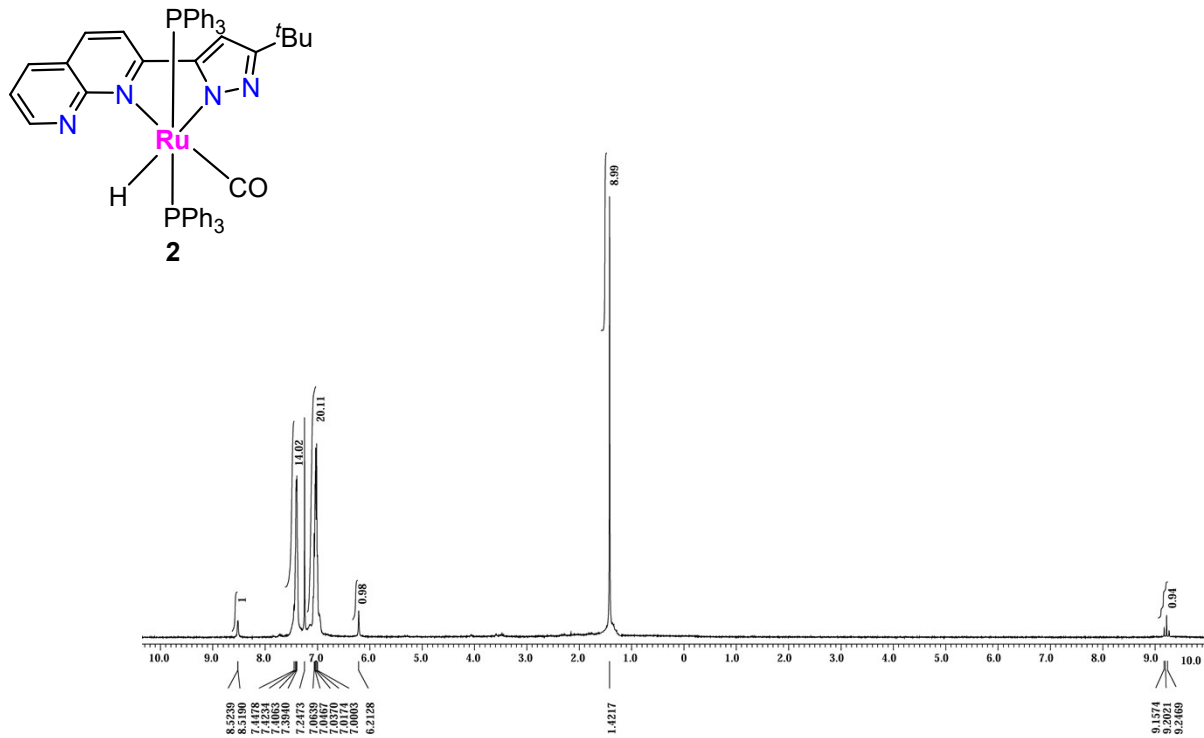

Figure S4.  $^1\text{H}$  NMR spectrum for **2** in  $\text{CDCl}_3$

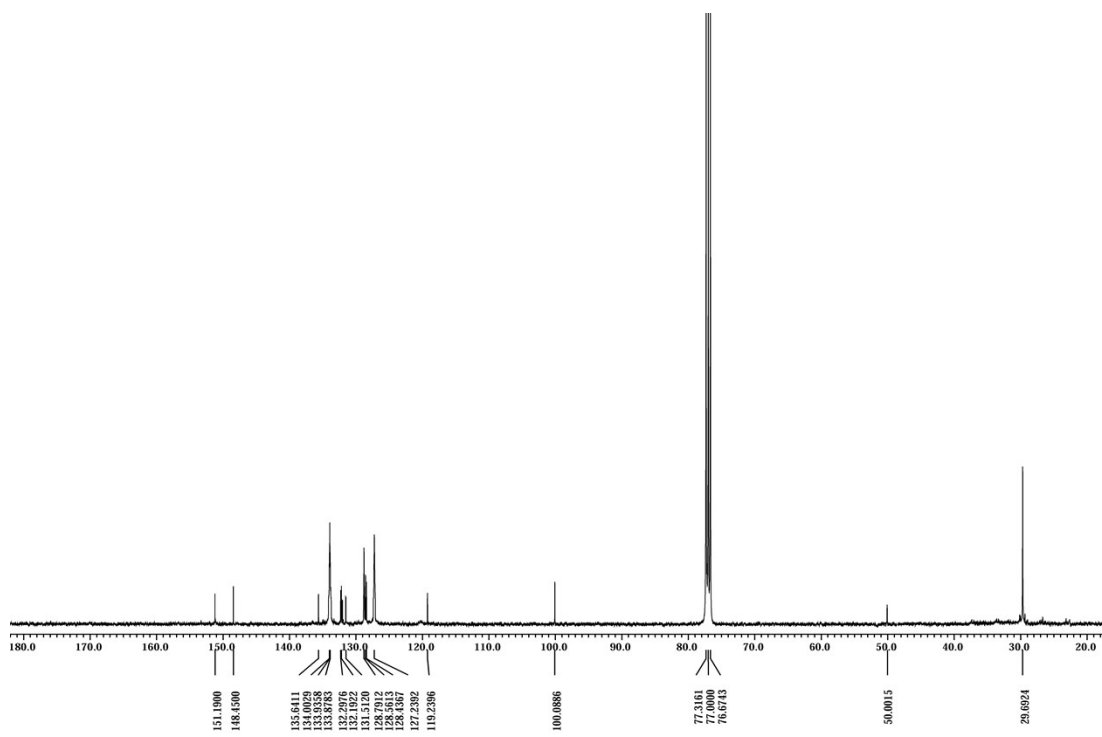

Figure S5.  $^{13}\text{C}$  NMR spectrum for **2** in  $\text{CDCl}_3$

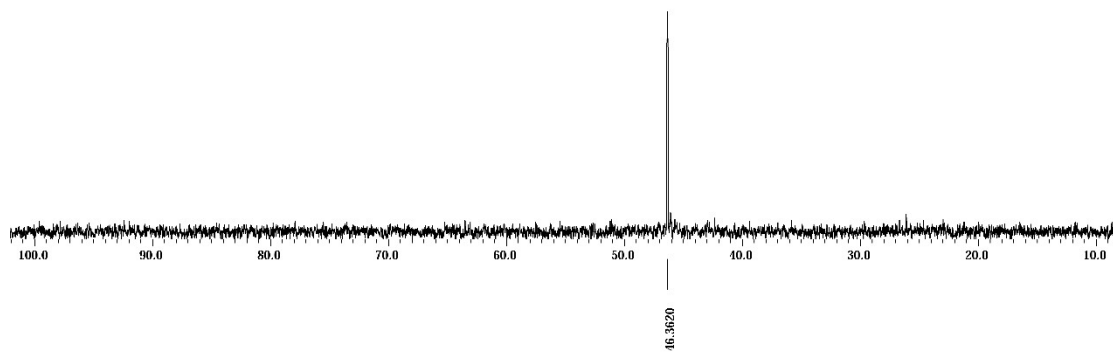

**Figure S6.**  $^{31}\text{P}\{^1\text{H}\}$  NMR spectrum for **2** in  $\text{CDCl}_3$

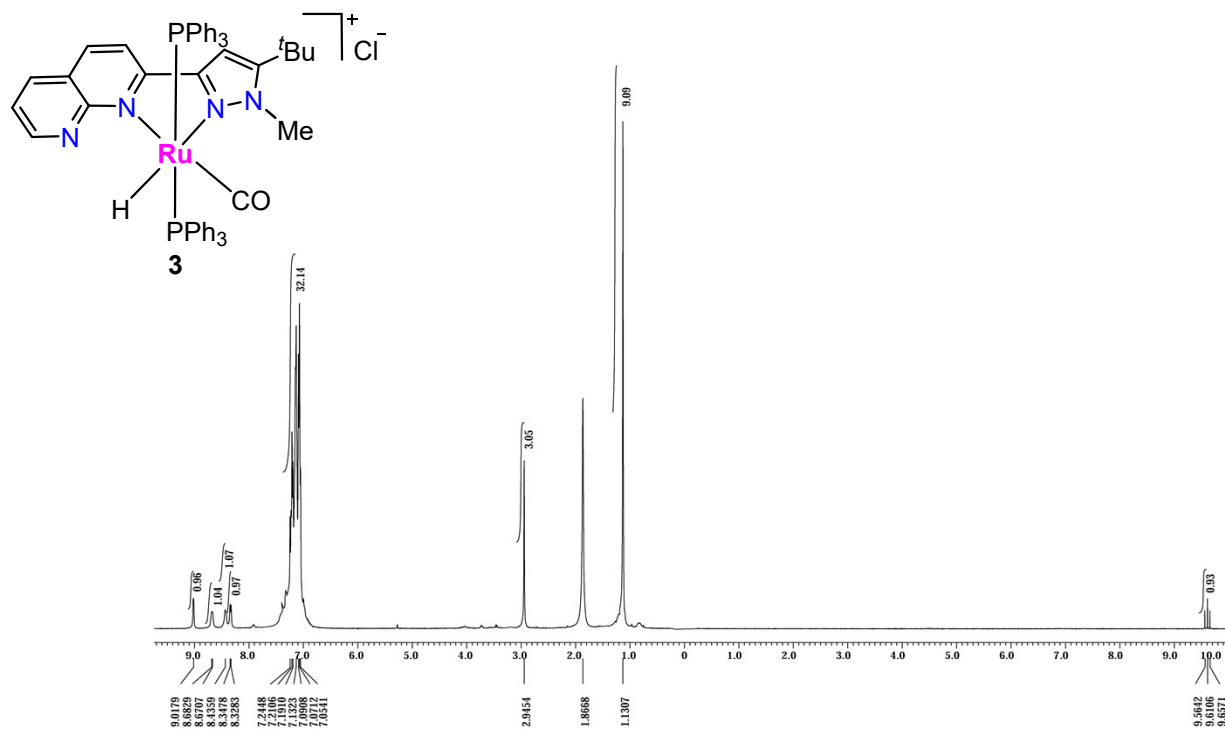

Figure S7.  $^1\text{H}$  NMR spectrum for **3** in  $\text{CDCl}_3$

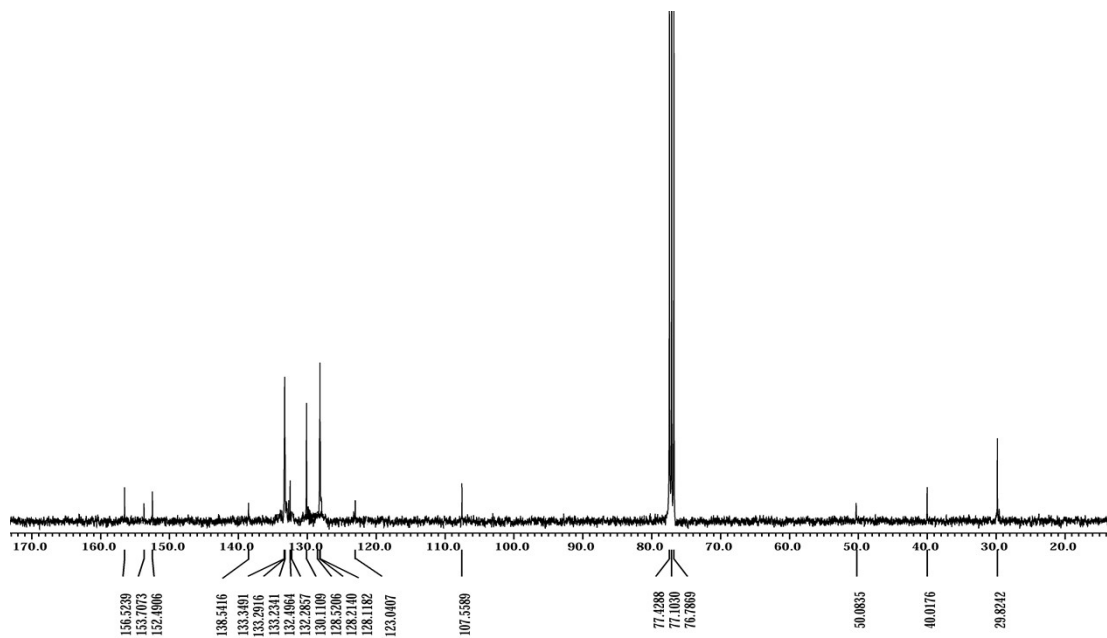

Figure S8.  $^{13}\text{C}$  NMR spectrum for **3** in  $\text{CDCl}_3$

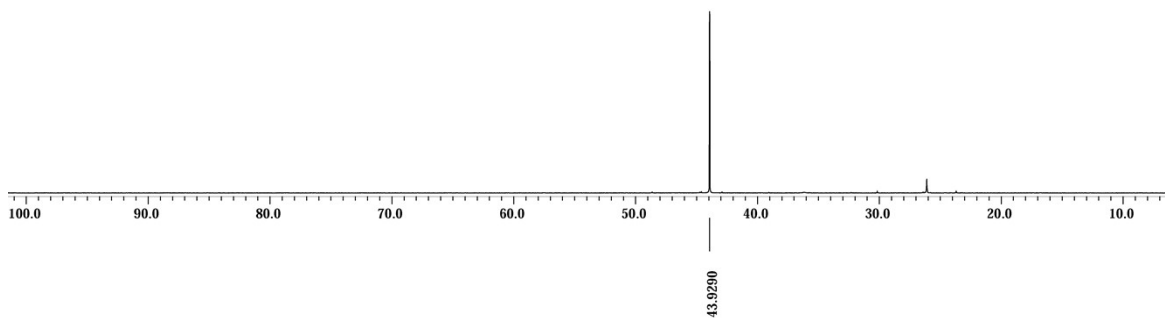

**Figure S9.**  $^{31}\text{P}\{\text{H}\}$  NMR spectrum for **3** in  $\text{CDCl}_3$

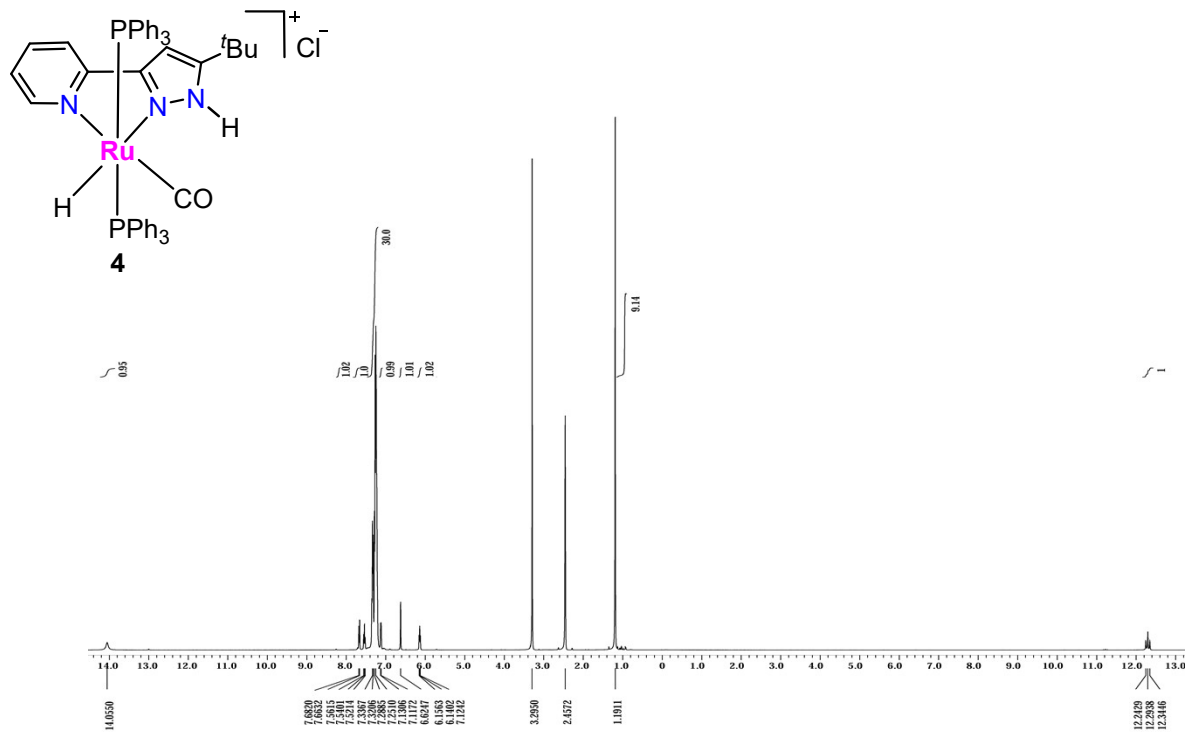

Figure S10.  $^1\text{H}$  NMR spectrum for **4** in  $\text{DMSO-}d_6$

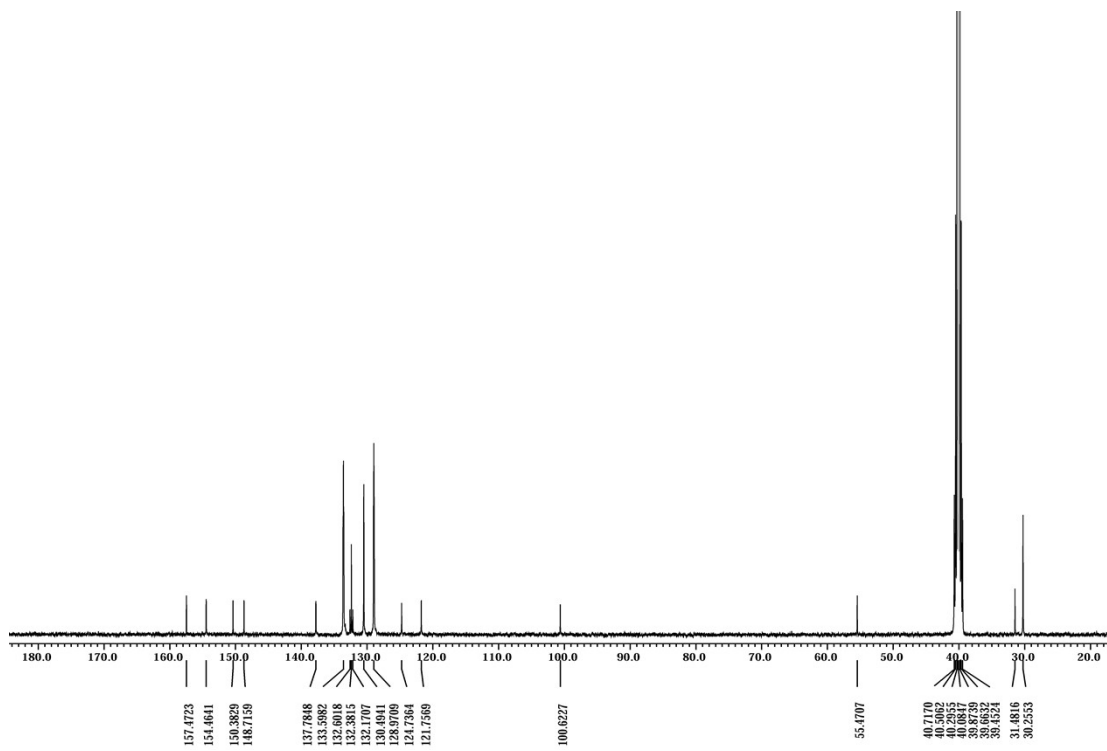

Figure S11.  $^{13}\text{C}$  NMR spectrum for **4** in  $\text{DMSO-}d_6$

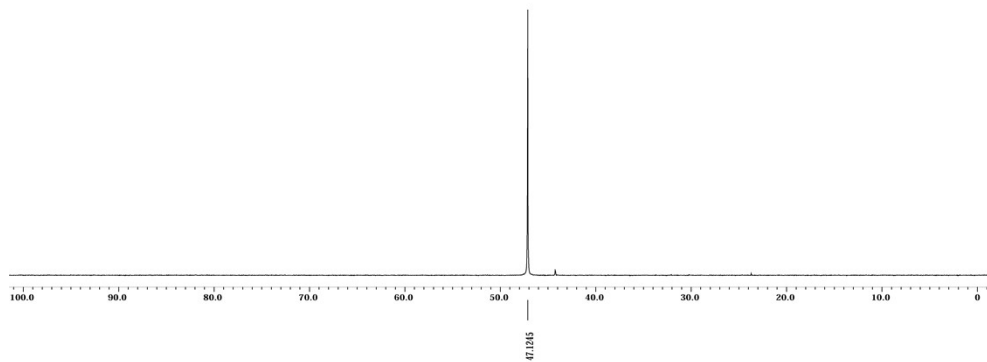

**Figure S12.**  $^{31}\text{P}\{\text{H}\}$  NMR spectrum for **4** in  $\text{DMSO-}d_6$

### 3. ESI-MS of Metal Complexes

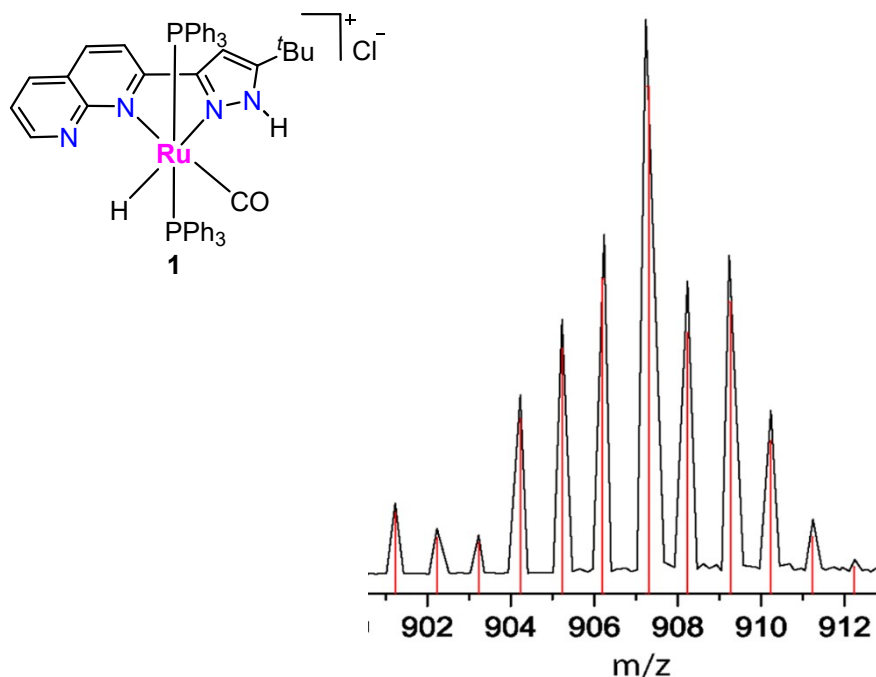

**Figure S13.** Experimental (black) and simulated (red) ESI-MS Spectrum for molecular ion at  $m/z = 907.2305$  ( $z=1$ ) in complex 1.

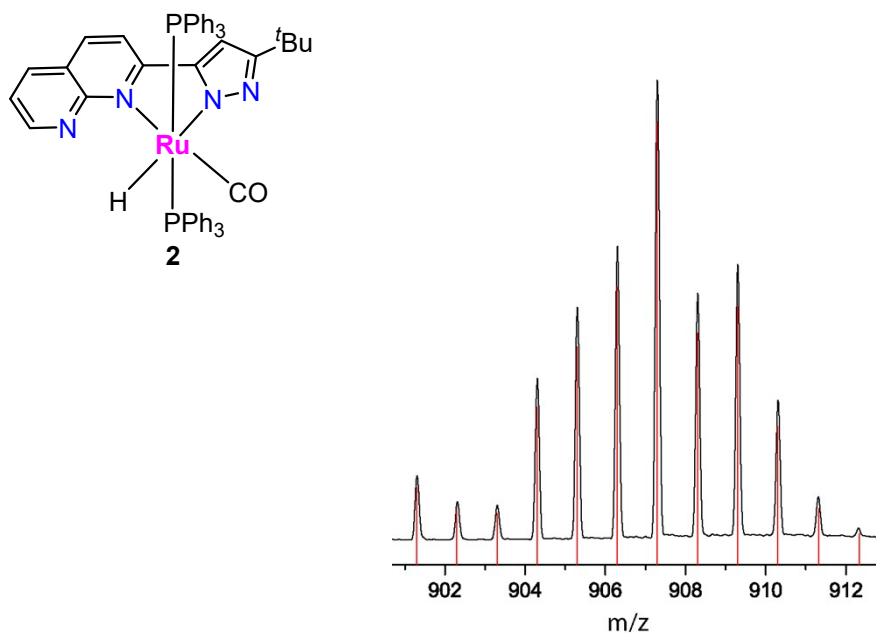

**Figure S14.** Experimental (black) and simulated (red) ESI-MS Spectrum for molecular ion at  $m/z = 907.2291$  ( $z=1$ ) in complex 2.

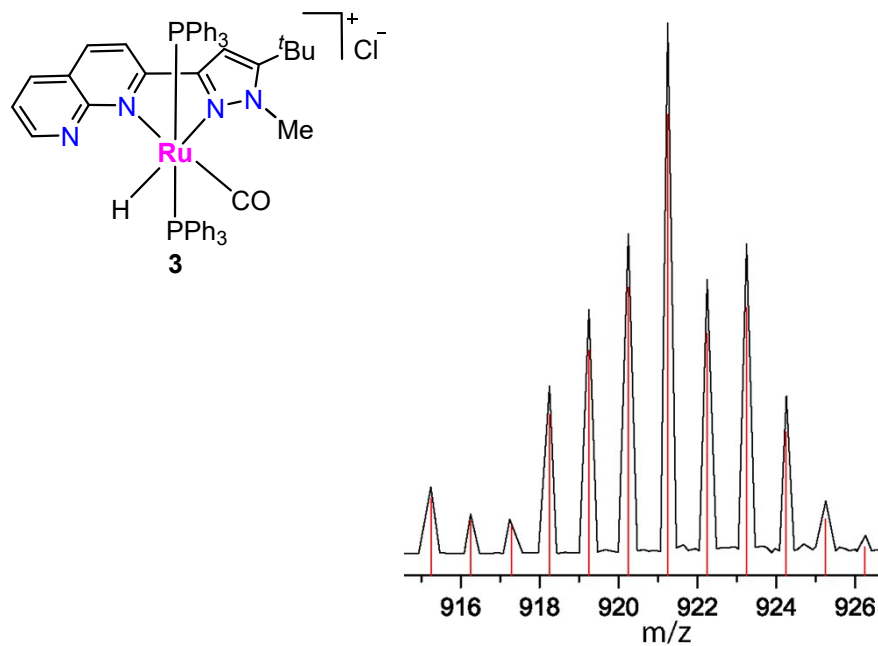

**Figure S15.** Experimental (black) and simulated (red) ESI-MS Spectrum for molecular ion at  $m/z = 921.2469$  ( $z=1$ ) in complex 3.

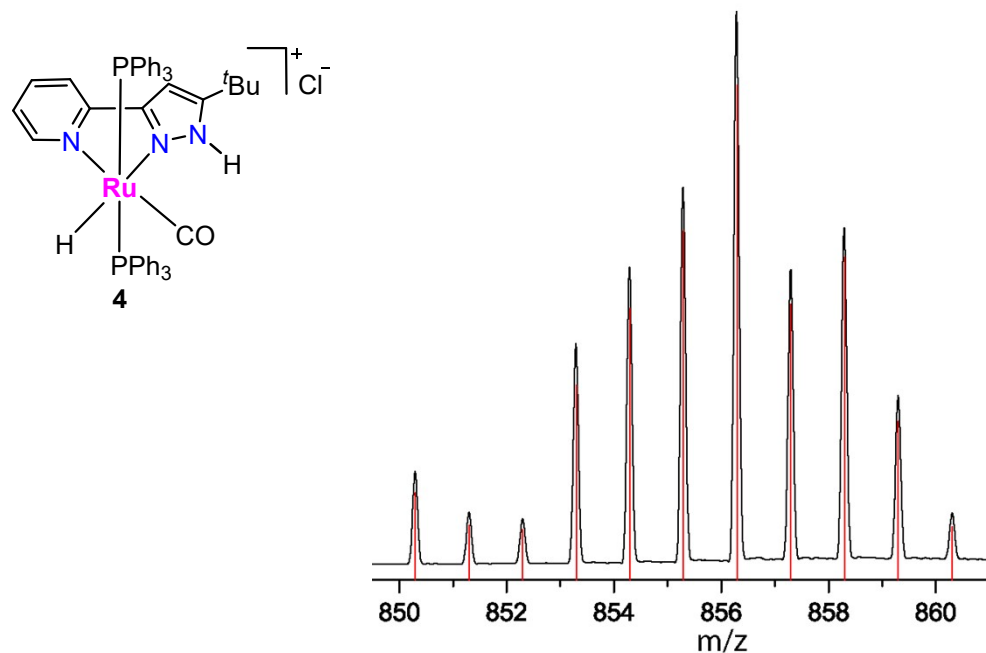

**Figure S16.** Experimental (black) and simulated (red) ESI-MS Spectrum for molecular ion at  $m/z = 856.2159$  ( $z=1$ ) in complex 4.

#### 4. Qualitative Analysis of Ammonia Gas.

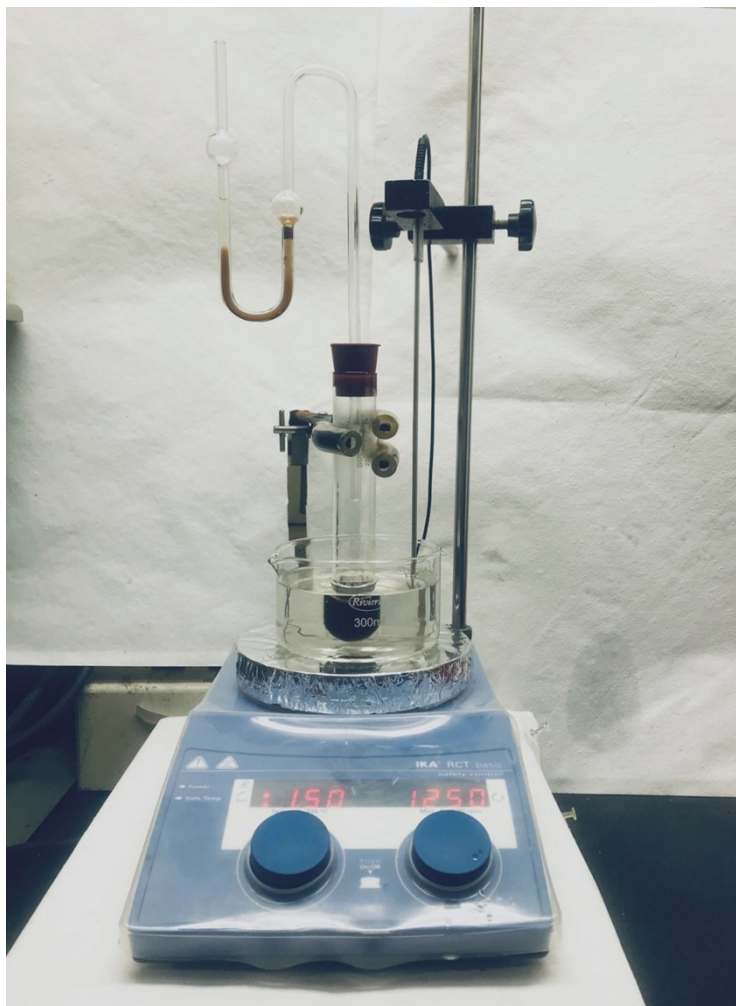

**Figure S17.** Qualitative  $\text{NH}_3$  gas detection using Nessler's reagent

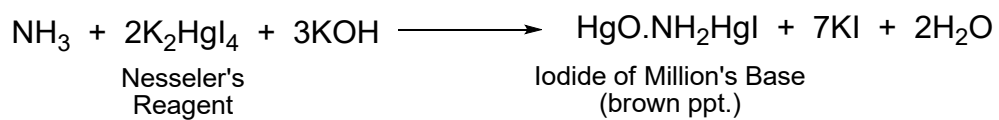

## 5. Coordinates of DFT Optimized Structures

|                                                                                                                         | Product - Reactant               | $\Delta E = E_{\text{product}} - E_{\text{reactant}}$<br>(energies in Hartree) | $\Delta E$<br>(Kcal mole <sup>-1</sup> ) |
|-------------------------------------------------------------------------------------------------------------------------|----------------------------------|--------------------------------------------------------------------------------|------------------------------------------|
| <b>A</b>                                                                                                                |                                  |                                                                                | 0 0.0                                    |
| <b>TSAC</b>                                                                                                             | (TSAC) – (A+I)                   | (-1391.1476) – (-1391.17954)                                                   | 20.0                                     |
| <b>C</b>                                                                                                                | (C+II) – (A+I)                   | (-1065.17) – (-1065.4375)                                                      | 4.1                                      |
| <b>TSCA</b>                                                                                                             | (TSCA) – (A+III+H <sub>2</sub> ) | (-1661.4972) – (-1661.5268)                                                    | 18.6                                     |
| <b>A+V</b>                                                                                                              | (A+V) – (A+III+H <sub>2</sub> )  | (-1661.5338) – (-1661.52689)                                                   | -4.4                                     |
| <b>TSBC</b>                                                                                                             | (TSBC+CO) – (A+I)                | (-1391.1217) – (-1391.1795)                                                    | 36.29                                    |
| <b>TSAB</b>                                                                                                             | (TSAB) – (A+2*I)                 | (-1718.0626) – (-1718.1026)                                                    | 25.09                                    |
| <b>B</b>                                                                                                                | B – (A+I)                        | (-1391.14570) – (-1391.1795)                                                   | 21.23                                    |
| <b>TS1</b>                                                                                                              | (TS1) – (A+II)                   | (-1389.9281) – (-1389.985354)                                                  | 34.58                                    |
| <b>TS2</b>                                                                                                              | (TS2) – (A+I+II)                 | (-1716.850262) – (-1716.908406)                                                | 36.49                                    |
| <b>Energy Details of Intermediates and Transition states (EE+E<sub>Thermal free energy correction</sub>) in Hartree</b> |                                  |                                                                                |                                          |
| <b>A</b>                                                                                                                | -1064.2565                       | <b>TSAB</b>                                                                    | -1718.063                                |
| <b>B</b>                                                                                                                | -1391.1457                       | <b>TSBC</b>                                                                    | -1277.745                                |
| <b>C</b>                                                                                                                | -1065.4310                       | <b>TSCA</b>                                                                    | -1661.4972                               |
| <b>I</b>                                                                                                                | -326.9230                        | <b>TSAC</b>                                                                    | -1391.148                                |
| <b>II</b>                                                                                                               | -325.742                         | <b>H<sub>2</sub></b>                                                           | -1.181                                   |
| <b>III</b>                                                                                                              | -596.0893                        | <b>CO</b>                                                                      | -113.376                                 |
| <b>IV</b>                                                                                                               | -56.5695                         | <b>TS1</b>                                                                     | -1389.928                                |
| <b>V</b>                                                                                                                | -597.2773                        | <b>TS2</b>                                                                     | -1716.850                                |

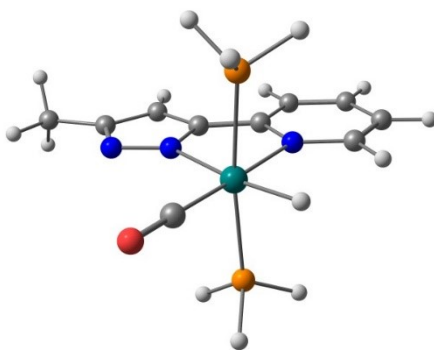

1

|                                                | Energy (in Hartree) |
|------------------------------------------------|---------------------|
| EE                                             | -1407.6185          |
| Thermal free energy corrections                | 0.1811              |
| EE+E <sub>thermal free energy correction</sub> | -1407.4374          |

O 1

|    |             |             |             |
|----|-------------|-------------|-------------|
| Ru | 0.89668400  | -0.79101100 | -0.00000300 |
| O  | 3.88262500  | -0.49036500 | -0.00012500 |
| N  | -1.29182300 | -0.94228800 | 0.00014500  |
| N  | 0.21178200  | 1.25364200  | 0.00045700  |
| N  | 0.82176500  | 2.43157200  | -0.00031700 |
| C  | -1.99110000 | -2.08734800 | 0.00008400  |
| C  | -1.95750900 | 0.24900100  | 0.00020100  |
| C  | -3.37131300 | -2.12668000 | 0.00000900  |
| C  | -3.36206800 | 0.26789200  | 0.00016300  |
| H  | -3.87201700 | 1.22091500  | 0.00024200  |
| C  | -1.13790600 | 1.42574700  | 0.00034300  |
| C  | -4.06688200 | -0.91599100 | 0.00003500  |
| H  | -5.14961400 | -0.90541900 | -0.00001700 |
| C  | -0.13916600 | 3.38829800  | -0.00079200 |
| C  | -1.40284800 | 2.80230100  | -0.00058300 |
| H  | -2.36013500 | 3.29758200  | -0.00102700 |
| H  | 1.09971600  | -2.40876900 | -0.00033900 |
| C  | 2.73733200  | -0.59367400 | -0.00009800 |
| C  | 0.23635900  | 4.83562900  | 0.00019100  |
| H  | -0.17237200 | 5.36095500  | -0.86687400 |
| H  | -0.12935900 | 5.34888700  | 0.89351700  |
| H  | 1.32159500  | 4.93071600  | -0.02494400 |
| P  | 0.90545200  | -0.95292600 | 2.31659800  |
| H  | 2.02794600  | -1.51229100 | 2.95574400  |

|   |             |             |             |
|---|-------------|-------------|-------------|
| H | 0.76540500  | 0.19589100  | 3.12700600  |
| H | -0.08727500 | -1.74572100 | 2.93078000  |
| P | 0.90524900  | -0.95320500 | -2.31653500 |
| H | 0.76660900  | 0.19534800  | -3.12756600 |
| H | 2.02719200  | -1.51414600 | -2.95525800 |
| H | -0.08833700 | -1.74516300 | -2.93040500 |
| H | -1.40131600 | -2.99352500 | 0.00007200  |
| H | -3.88510000 | -3.07741000 | -0.00007500 |

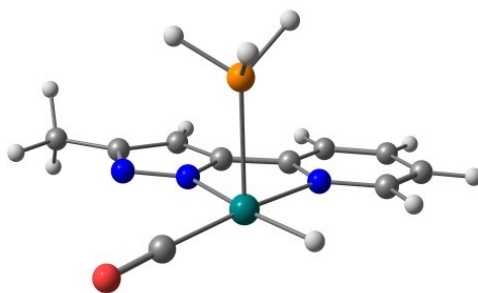

A

|                                                | Energy (in Hartree) |
|------------------------------------------------|---------------------|
| EE                                             | -1064.4121          |
| Thermal free energy corrections                | 0.1557              |
| EE+E <sub>thermal free energy correction</sub> | -1064.2565          |

0 1

|    |          |          |          |
|----|----------|----------|----------|
| Ru | -0.40927 | -1.18912 | -0.39994 |
| O  | -3.26417 | -1.82424 | -1.11689 |
| N  | 1.606292 | -0.42509 | -0.21476 |
| N  | -0.72497 | 0.760862 | -0.1614  |
| N  | -1.84356 | 1.451751 | -0.08835 |
| C  | 2.750316 | -1.11621 | -0.27519 |
| C  | 1.650401 | 0.930358 | -0.08755 |
| C  | 3.994423 | -0.51958 | -0.20951 |

---

|   |          |          |          |
|---|----------|----------|----------|
| C | 2.88246  | 1.593729 | -0.01371 |
| H | 2.896155 | 2.67008  | 0.085354 |
| C | 0.367394 | 1.566873 | -0.04158 |
| C | 4.054175 | 0.868222 | -0.07504 |
| H | 5.010578 | 1.372582 | -0.02194 |
| C | -1.49194 | 2.750307 | 0.081573 |
| C | -0.10383 | 2.87547  | 0.116775 |
| H | 0.474991 | 3.776142 | 0.238776 |
| H | -0.2366  | -0.92152 | -1.98102 |
| C | -2.18156 | -1.59687 | -0.81448 |
| C | -2.54409 | 3.804655 | 0.204737 |
| H | -2.5294  | 4.277675 | 1.190266 |
| H | -2.41082 | 4.594117 | -0.53868 |
| H | -3.52752 | 3.359877 | 0.056941 |
| P | -0.68233 | -1.56213 | 1.998814 |
| H | -1.622   | -0.73882 | 2.655131 |
| H | -1.14249 | -2.79325 | 2.519905 |
| H | 0.371014 | -1.39067 | 2.929437 |
| H | 2.653028 | -2.18997 | -0.38375 |
| H | 4.888705 | -1.12365 | -0.26458 |

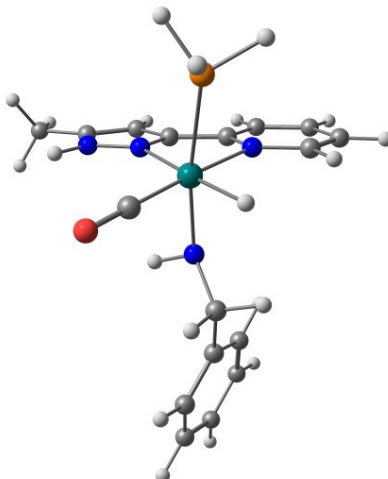**B**

|                                                | Energy (in Hartree) |
|------------------------------------------------|---------------------|
| EE                                             | -1391.4352          |
| Thermal free energy corrections                | 0.2895              |
| EE+E <sub>thermal free energy correction</sub> | -1391.1457          |

O 1

|    |             |             |             |
|----|-------------|-------------|-------------|
| Ru | -0.85987200 | -1.13797800 | 0.51043400  |
| O  | -0.31235000 | -3.83090100 | -0.65350600 |
| N  | -1.13593400 | 0.92348700  | 1.30335200  |
| N  | -1.46676000 | 0.10253600  | -1.19149100 |
| N  | -1.65904100 | -0.07113600 | -2.50430400 |
| C  | -0.95467900 | 1.28030700  | 2.57667900  |
| C  | -1.36780800 | 1.88675600  | 0.38397200  |
| C  | -1.00108100 | 2.59906200  | 3.00217000  |
| C  | -1.43650600 | 3.23232300  | 0.74012600  |
| H  | -1.62696600 | 3.98054000  | -0.01674100 |
| C  | -1.54677900 | 1.41723100  | -0.98259900 |
| C  | -1.24878800 | 3.59291000  | 2.06356500  |
| H  | -1.29093700 | 4.63349700  | 2.35831600  |
| C  | -1.86803500 | 1.10186500  | -3.16148800 |

---

|   |             |             |             |
|---|-------------|-------------|-------------|
| C | -1.80561000 | 2.08664300  | -2.20051100 |
| H | -1.92282800 | 3.14323000  | -2.36669500 |
| H | -0.29190800 | -1.72457400 | 1.88907100  |
| C | -0.53245700 | -2.78902300 | -0.20012200 |
| C | -2.09917100 | 1.16506500  | -4.63185900 |
| H | -2.24951500 | 2.19822100  | -4.93949100 |
| H | -1.24587800 | 0.77001400  | -5.18837700 |
| H | -2.98358600 | 0.59451000  | -4.92539900 |
| P | -2.91322700 | -1.81749100 | 1.31526500  |
| H | -4.13678800 | -1.76794900 | 0.59143700  |
| H | -3.05939800 | -3.15408700 | 1.74630700  |
| H | -3.43602100 | -1.21889400 | 2.49047600  |
| H | -0.75549700 | 0.47233300  | 3.26665300  |
| H | -0.84031300 | 2.83433000  | 4.04503700  |
| H | -1.61533600 | -1.00253600 | -2.88411100 |
| N | 1.06840000  | -0.41342900 | 0.06763400  |
| H | 1.20789900  | -0.47606400 | -0.93926600 |
| C | 2.23388900  | -1.03388200 | 0.68904600  |
| H | 2.13659900  | -0.92274500 | 1.77423000  |
| H | 2.32432900  | -2.11762700 | 0.50938600  |
| C | 3.52792800  | -0.38064700 | 0.24276200  |
| C | 4.54913800  | -1.12453000 | -0.34678200 |
| C | 3.72460100  | 0.99371600  | 0.40705800  |
| C | 5.73675400  | -0.52197400 | -0.75552100 |
| H | 4.41179400  | -2.19126900 | -0.48591000 |

|   |            |             |             |
|---|------------|-------------|-------------|
| C | 4.90661200 | 1.60012400  | 0.00412600  |
| H | 2.92817900 | 1.58248400  | 0.84500100  |
| C | 5.92028200 | 0.84330000  | -0.57987300 |
| H | 6.51624800 | -1.12057000 | -1.21190700 |
| H | 5.04259900 | 2.66601200  | 0.14630700  |
| H | 6.84251400 | 1.31605600  | -0.89516400 |

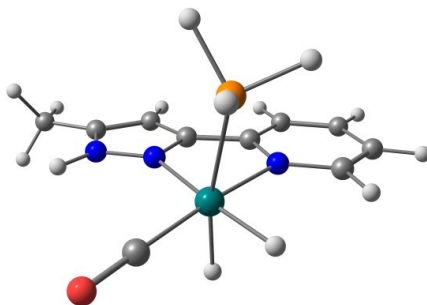

C

|                                                | Energy (in Hartree) |
|------------------------------------------------|---------------------|
| EE                                             | -1065.6065          |
| Thermal free energy corrections                | 0.1755              |
| EE+E <sub>thermal free energy correction</sub> | -1065.4310          |

O 1

|    |             |             |             |
|----|-------------|-------------|-------------|
| Ru | -1.13428500 | -0.57333000 | -0.37958000 |
| O  | -3.84483900 | 0.52620100  | -1.00566300 |
| N  | 0.94211400  | -1.25159400 | -0.24035600 |
| N  | 0.05083600  | 1.19929200  | -0.03808800 |
| N  | -0.17964500 | 2.51374200  | 0.04883200  |
| C  | 1.33954000  | -2.52578600 | -0.36496400 |
| C  | 1.88889400  | -0.29552800 | -0.05764500 |
| C  | 2.66797200  | -2.90913800 | -0.30842200 |
| C  | 3.24515200  | -0.61424400 | 0.01028500  |
| H  | 3.97223100  | 0.17260300  | 0.15720100  |

---

|   |             |             |             |
|---|-------------|-------------|-------------|
| C | 1.37832400  | 1.05704900  | 0.04201300  |
| C | 3.64116900  | -1.93322100 | -0.11570900 |
| H | 4.68933400  | -2.19836600 | -0.06802800 |
| C | 0.96686000  | 3.23973400  | 0.17926500  |
| C | 1.99372500  | 2.32378900  | 0.18278800  |
| H | 3.04301000  | 2.54679200  | 0.26802800  |
| H | -1.68926200 | -2.02070100 | -0.81489100 |
| C | -2.80382500 | 0.09279600  | -0.74440800 |
| C | 0.96257600  | 4.72562300  | 0.28503400  |
| H | 1.98279500  | 5.09384300  | 0.37704500  |
| H | 0.51642100  | 5.18963600  | -0.59804800 |
| H | 0.40244400  | 5.06562700  | 1.15965300  |
| P | -1.69379200 | -1.29578700 | 1.79043800  |
| H | -1.60751100 | -0.57632900 | 3.01803700  |
| H | -3.01421800 | -1.74760400 | 2.00103900  |
| H | -1.05522300 | -2.45697500 | 2.29498000  |
| H | 0.54901800  | -3.24516200 | -0.52284500 |
| H | 2.92951700  | -3.95241700 | -0.41811100 |
| H | -0.89204000 | -0.45855700 | -1.98594400 |
| H | -1.12785800 | 2.84479600  | -0.01998000 |

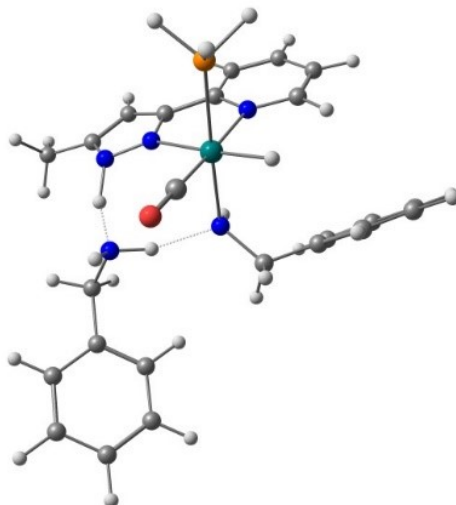

TSAB

|                                                | Energy (in Hartree)      |
|------------------------------------------------|--------------------------|
| EE                                             | -1717.6394               |
| Thermal free energy corrections                | 0.4232                   |
| EE+E <sub>thermal free energy correction</sub> | -1718.0626               |
| Imaginary frequency                            | -1005.7 cm <sup>-1</sup> |

0 1

|    |             |             |             |
|----|-------------|-------------|-------------|
| Ru | -0.99811100 | -0.20596500 | 0.98341900  |
| O  | 1.63402400  | -0.29875800 | 2.37893100  |
| N  | -2.99740100 | -0.19056600 | -0.01520400 |
| N  | -1.06252400 | -1.94590300 | -0.37122100 |
| N  | -0.14757400 | -2.82170400 | -0.80098400 |
| C  | -3.92051500 | 0.76160800  | 0.16138400  |
| C  | -3.30841600 | -1.27471100 | -0.77027800 |
| C  | -5.19360700 | 0.68323600  | -0.37933100 |
| C  | -4.57672800 | -1.41980500 | -1.33473000 |
| H  | -4.79975200 | -2.29817900 | -1.92440900 |
| C  | -2.22315500 | -2.21735600 | -0.97855700 |
| C  | -5.52758300 | -0.43449900 | -1.13551300 |

---

|   |             |             |             |
|---|-------------|-------------|-------------|
| H | -6.51481500 | -0.53270200 | -1.56890900 |
| C | -0.72054500 | -3.67790300 | -1.68660400 |
| C | -2.05633000 | -3.33551900 | -1.81940800 |
| H | -2.78722900 | -3.81497600 | -2.44856800 |
| H | -1.22561300 | 1.19142300  | 1.73539200  |
| C | 0.60956400  | -0.26399000 | 1.83618500  |
| C | 0.05761200  | -4.77265800 | -2.33881200 |
| H | -0.55286800 | -5.28065800 | -3.08448300 |
| H | 0.94880900  | -4.38839300 | -2.84102600 |
| H | 0.38782800  | -5.51674600 | -1.60994500 |
| P | -1.99926200 | -1.13540700 | 2.82353700  |
| H | -2.17436500 | -2.53290700 | 3.01098300  |
| H | -1.46812000 | -0.87349800 | 4.10444000  |
| H | -3.33852900 | -0.78206200 | 3.12208400  |
| H | -3.60937900 | 1.61349400  | 0.74917000  |
| H | -5.89806600 | 1.48562800  | -0.21191500 |
| H | 0.97676700  | -2.26933200 | -0.77229800 |
| N | -0.07760400 | 0.74429300  | -0.71492900 |
| H | 1.34428400  | -0.45576100 | -0.83111600 |
| C | 0.21168300  | 2.17993200  | -0.70713300 |
| H | 0.81654500  | 2.40380100  | 0.17390800  |
| H | -0.68871900 | 0.56006000  | -1.50818100 |
| N | 1.93974400  | -1.33470400 | -0.82839400 |
| H | 0.83162600  | 2.43560900  | -1.58243300 |
| C | -0.98513500 | 3.11339700  | -0.72964300 |

---

|   |             |             |             |
|---|-------------|-------------|-------------|
| C | -1.39264500 | 3.81280000  | 0.40686900  |
| C | -1.71741400 | 3.29167300  | -1.90620100 |
| C | -2.50149300 | 4.65313600  | 0.37479000  |
| H | -0.83589200 | 3.69191800  | 1.32782100  |
| C | -2.82831600 | 4.12573300  | -1.94573300 |
| H | -1.40804200 | 2.77310400  | -2.80782900 |
| C | -3.22676300 | 4.81021800  | -0.80140600 |
| H | -2.79605200 | 5.18998500  | 1.26884500  |
| H | -3.37710500 | 4.25124600  | -2.87155200 |
| H | -4.08626100 | 5.46872300  | -0.83018400 |
| H | 2.51158600  | -1.32828600 | 0.01175900  |
| C | 2.77783400  | -1.44462200 | -2.03847300 |
| H | 3.12969400  | -2.47501900 | -2.12886500 |
| H | 2.12468300  | -1.25206700 | -2.89286100 |
| C | 3.96553100  | -0.51047800 | -2.06812100 |
| C | 3.78650700  | 0.87102100  | -2.16742300 |
| C | 5.26338100  | -1.01245900 | -1.98759200 |
| C | 4.87945300  | 1.72680400  | -2.18354600 |
| H | 2.78405800  | 1.27797400  | -2.22431900 |
| C | 6.36121600  | -0.15765000 | -2.00464800 |
| H | 5.41864100  | -2.08293600 | -1.91231500 |
| C | 6.17115200  | 1.21455100  | -2.10253700 |
| H | 4.72369500  | 2.79561100  | -2.25988900 |
| H | 7.36245600  | -0.56513700 | -1.94096600 |
| H | 7.02294300  | 1.88274000  | -2.11525000 |

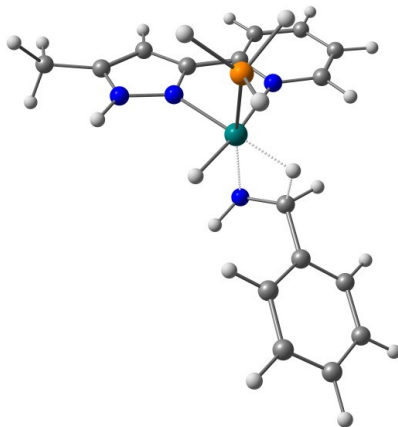

TSBC

|                                                | Energy (in Hartree)      |
|------------------------------------------------|--------------------------|
| EE                                             | -1,278.028179            |
| Thermal free energy corrections                | 0.283064                 |
| EE+E <sub>thermal free energy correction</sub> | -1277.745115             |
| Imaginary frequency                            | -507.30 cm <sup>-1</sup> |

01

|    |          |          |          |
|----|----------|----------|----------|
| Ru | -1.01879 | -2.07209 | -0.49478 |
| N  | -0.50343 | -0.57525 | 1.064093 |
| N  | -1.33724 | -0.23488 | -1.38709 |
| N  | -1.72766 | 0.156676 | -2.60822 |
| C  | -0.12487 | -0.79999 | 2.32949  |
| C  | -0.55635 | 0.715545 | 0.637526 |
| C  | 0.222389 | 0.207286 | 3.212717 |
| C  | -0.2202  | 1.781077 | 1.473534 |
| H  | -0.27343 | 2.79363  | 1.096777 |
| C  | -1.00771 | 0.884084 | -0.72794 |
| C  | 0.177958 | 1.528203 | 2.773223 |
| H  | 0.445713 | 2.341817 | 3.434651 |
| C  | -1.65744 | 1.508883 | -2.76574 |

---

|   |          |          |          |
|---|----------|----------|----------|
| C | -1.20141 | 2.007427 | -1.56686 |
| H | -1.02937 | 3.044367 | -1.33588 |
| H | -0.57685 | -3.48413 | 0.288943 |
| C | -2.03054 | 2.183271 | -4.04038 |
| H | -3.07576 | 2.000485 | -4.30263 |
| H | -1.8923  | 3.258884 | -3.94498 |
| H | -1.41258 | 1.838384 | -4.87336 |
| P | -3.14341 | -2.54385 | 0.066369 |
| H | -4.24926 | -2.01607 | -0.65813 |
| H | -3.56509 | -3.89062 | -0.00052 |
| H | -3.71027 | -2.28553 | 1.346335 |
| H | -0.10671 | -1.83784 | 2.635778 |
| H | 0.522262 | -0.04137 | 4.221553 |
| H | -1.97652 | -0.55232 | -3.27800 |
| N | 1.046892 | -2.27365 | -1.05302 |
| C | 0.866254 | -3.25949 | -0.12046 |
| H | -1.37993 | -2.97821 | -1.78776 |
| C | 1.186882 | -4.69657 | -0.43797 |
| C | 2.150892 | -5.35679 | 0.32267  |
| C | 0.591544 | -5.37489 | -1.50291 |
| C | 2.523646 | -6.66354 | 0.02315  |
| H | 2.620577 | -4.83984 | 1.151883 |
| C | 0.961334 | -6.67886 | -1.80252 |
| H | -0.18087 | -4.87544 | -2.07428 |
| C | 1.92976  | -7.32866 | -1.04177 |

|   |          |          |          |
|---|----------|----------|----------|
| H | 3.277577 | -7.1594  | 0.622258 |
| H | 0.485475 | -7.19555 | -2.62724 |
| H | 2.214105 | -8.34711 | -1.27556 |
| H | 1.079181 | -2.68907 | -1.98030 |
| H | 1.215274 | -2.98975 | 0.876757 |

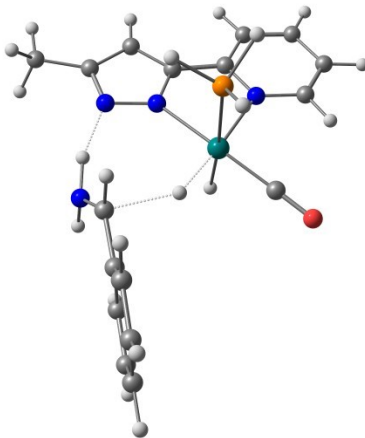

TSAC

|                                                | Energy (in Hartree)     |
|------------------------------------------------|-------------------------|
| EE                                             | -1390.86184             |
| Thermal free energy corrections                | 0.2858                  |
| EE+E <sub>thermal free energy correction</sub> | -1391.148               |
| Imaginary frequency                            | -166.5 cm <sup>-1</sup> |

01

|    |          |          |          |
|----|----------|----------|----------|
| Ru | 0.051567 | -0.51528 | 0.304762 |
| O  | -1.55457 | -3.04146 | 0.221825 |
| N  | 2.04869  | -1.30717 | -0.08725 |
| N  | 1.298014 | 1.229427 | 0.07790  |
| N  | 1.086365 | 2.550801 | 0.103917 |
| C  | 2.367733 | -2.60427 | -0.19435 |
| C  | 3.028181 | -0.38006 | -0.25746 |
| C  | 3.649141 | -3.04910 | -0.46465 |
| C  | 4.344313 | -0.76579 | -0.53141 |

---

|   |          |          |          |
|---|----------|----------|----------|
| H | 5.100182 | -0.00396 | -0.66294 |
| C | 2.60502  | 0.997418 | -0.15191 |
| C | 4.659784 | -2.10651 | -0.63566 |
| H | 5.674857 | -2.41635 | -0.84911 |
| C | 2.268166 | 3.176587 | -0.11069 |
| C | 3.269036 | 2.22821  | -0.27534 |
| H | 4.314966 | 2.408859 | -0.45936 |
| H | -0.21421 | -0.42746 | -1.29745 |
| C | -0.93066 | -2.0670  | 0.27439  |
| C | 2.361231 | 4.66808  | -0.15235 |
| H | 3.402345 | 4.985336 | -0.21139 |
| H | 1.839087 | 5.081476 | -1.01990 |
| H | 1.921042 | 5.11974  | 0.739602 |
| P | 0.279042 | -0.45169 | 2.669747 |
| H | -0.74901 | -0.96078 | 3.497863 |
| H | 1.337092 | -1.07935 | 3.38167  |
| H | 0.401688 | 0.79001  | 3.345387 |
| H | 1.553822 | -3.30296 | -0.05891 |
| H | 3.844313 | -4.10984 | -0.53975 |
| H | -1.82616 | 1.983174 | 1.454281 |
| H | -0.45880 | 2.881715 | -0.17705 |
| N | -1.51800 | 2.761905 | -0.38318 |
| H | -1.82245 | 2.822521 | -1.34454 |
| C | -2.19214 | 2.009989 | 0.43807  |
| H | -1.39917 | 0.274155 | 0.35110  |

|   |          |          |          |
|---|----------|----------|----------|
| C | -3.5551  | 1.533432 | 0.203802 |
| C | -4.09571 | 1.409665 | -1.07987 |
| C | -4.34648 | 1.214694 | 1.310713 |
| C | -5.40525 | 0.990863 | -1.24766 |
| H | -3.48511 | 1.602334 | -1.95303 |
| C | -5.66006 | 0.802718 | 1.141785 |
| H | -3.92563 | 1.290442 | 2.305839 |
| C | -6.19169 | 0.6917   | -0.13784 |
| H | -5.8127  | 0.885497 | -2.24465 |
| H | -6.2654  | 0.560953 | 2.005603 |
| H | -7.21352 | 0.361132 | -0.27323 |

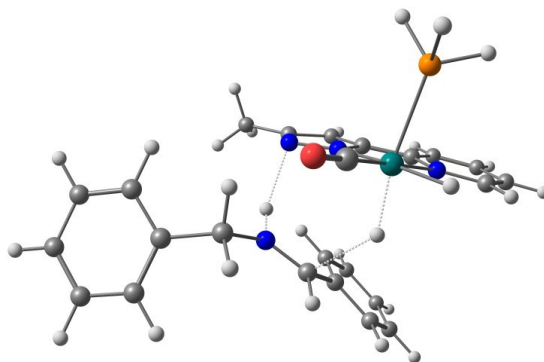

TSCA

|                                                | Energy (in Hartree)     |
|------------------------------------------------|-------------------------|
| EE                                             | -1661.0936              |
| Thermal free energy corrections                | 0.3866                  |
| EE+E <sub>thermal free energy correction</sub> | -1661.497               |
| Imaginary frequency                            | -309.8 cm <sup>-1</sup> |

0 1

|    |             |             |            |
|----|-------------|-------------|------------|
| Ru | -2.37665200 | -2.21861200 | 1.79103300 |
| O  | -0.85951300 | -4.72613900 | 2.35450200 |
| N  | -3.61629400 | -0.46007800 | 1.32958900 |
| N  | -1.25143000 | -0.47563600 | 2.55225900 |

---

|   |             |             |             |
|---|-------------|-------------|-------------|
| N | -0.12389000 | -0.28869700 | 3.25943400  |
| C | -4.83491500 | -0.51307700 | 0.77540000  |
| C | -3.04453800 | 0.75292400  | 1.54860700  |
| C | -5.54452700 | 0.61443400  | 0.40346200  |
| C | -3.70752300 | 1.93107600  | 1.18355500  |
| H | -3.22730700 | 2.88339000  | 1.36035600  |
| C | -1.75602300 | 0.72829600  | 2.19827000  |
| C | -4.96096200 | 1.86286800  | 0.60863400  |
| H | -5.48182800 | 2.76842500  | 0.32372100  |
| C | 0.10652500  | 1.04707100  | 3.32965200  |
| C | -0.90236700 | 1.73789700  | 2.66831100  |
| H | -1.00244400 | 2.80511200  | 2.55598500  |
| H | -3.52054600 | -3.22638100 | 1.26770700  |
| C | -1.42134100 | -3.73072700 | 2.15293400  |
| C | 1.32356900  | 1.58187000  | 4.01555600  |
| H | 1.55013100  | 1.01155800  | 4.91841800  |
| H | 2.20327700  | 1.52485800  | 3.36799400  |
| H | 1.18828900  | 2.62714500  | 4.29679400  |
| P | -1.61043200 | -2.22720400 | -0.39727900 |
| H | -0.48005600 | -1.50296600 | -0.86272300 |
| H | -1.25065600 | -3.46311400 | -0.97393900 |
| H | -2.48562500 | -1.80935600 | -1.42916000 |
| H | -5.23692900 | -1.50617000 | 0.63320600  |
| H | -6.52668700 | 0.51281400  | -0.03662300 |
| H | -0.74872600 | -1.19136500 | 4.84019700  |

---

|   |             |             |            |
|---|-------------|-------------|------------|
| C | -2.51779800 | -2.10794000 | 5.17984700 |
| N | -1.21715200 | -2.03244500 | 5.21572300 |
| C | -0.33343200 | -3.19989100 | 5.26526100 |
| H | -0.94813600 | -4.08507000 | 5.42549100 |
| H | -3.15863300 | -2.46293800 | 3.25842300 |
| H | -2.94223300 | -3.09135700 | 5.33849300 |
| C | -3.42431000 | -0.97534000 | 5.33405400 |
| C | -4.78807700 | -1.25054700 | 5.49785800 |
| C | -2.98520000 | 0.35111100  | 5.39285700 |
| C | -5.69328100 | -0.22611700 | 5.71594700 |
| H | -5.13374900 | -2.27515400 | 5.43581700 |
| C | -3.89604400 | 1.37481100  | 5.60659400 |
| H | -1.93922000 | 0.59286600  | 5.26436200 |
| C | -5.24820700 | 1.09185800  | 5.77004300 |
| H | -6.74437700 | -0.45207800 | 5.84053800 |
| H | -3.54714800 | 2.39855300  | 5.64534500 |
| H | -5.95348600 | 1.89572300  | 5.93902300 |
| C | 0.70723700  | -3.05543300 | 6.35209600 |
| C | 0.41301300  | -3.39825200 | 7.67181800 |
| C | 1.97693900  | -2.56717400 | 6.04807400 |
| C | 1.36891500  | -3.25707900 | 8.66964100 |
| H | -0.56897300 | -3.78474100 | 7.92057500 |
| C | 2.93518500  | -2.42287300 | 7.04557600 |
| H | 2.21248600  | -2.29747400 | 5.02560000 |
| C | 2.63324800  | -2.76773000 | 8.35762000 |

|   |            |             |            |
|---|------------|-------------|------------|
| H | 1.12975700 | -3.53325900 | 9.68892500 |
| H | 3.91870000 | -2.04517400 | 6.79587000 |
| H | 3.38034500 | -2.66005700 | 9.13385300 |
| H | 0.14697500 | -3.29831000 | 4.29277400 |

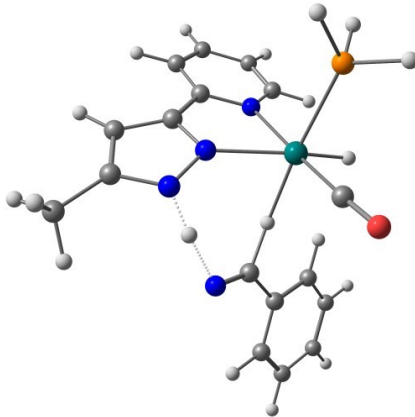

TS1

|                                                | Energy (in Hartrees)     |
|------------------------------------------------|--------------------------|
| EE                                             | -1390.1911               |
| Thermal free energy corrections                | 0.2630                   |
| EE+E <sub>thermal free energy correction</sub> | -1389.928                |
| Imaginary frequency                            | -619.25 cm <sup>-1</sup> |

0 1

|    |             |             |             |
|----|-------------|-------------|-------------|
| Ru | -0.50512400 | -0.68950500 | -0.64069100 |
| O  | 0.16593200  | 0.28202500  | -3.39234600 |
| N  | -1.09720900 | -1.48258600 | 1.33483400  |
| N  | -1.62313400 | 0.87392100  | 0.33855500  |
| N  | -1.68123600 | 2.19808600  | 0.13459500  |
| C  | -0.77542200 | -2.69846400 | 1.79983000  |
| C  | -1.96937400 | -0.72057900 | 2.05000400  |
| C  | -1.29274400 | -3.21753000 | 2.97287400  |
| C  | -2.53907800 | -1.19441600 | 3.23369400  |
| H  | -3.23734800 | -0.56928100 | 3.77276800  |

---

|   |             |             |             |
|---|-------------|-------------|-------------|
| C | -2.18027300 | 0.61212200  | 1.52576600  |
| C | -2.19843600 | -2.44985600 | 3.70040200  |
| H | -2.62854200 | -2.82753000 | 4.61903000  |
| C | -2.29025400 | 2.79890200  | 1.19698700  |
| C | -2.65294600 | 1.81376400  | 2.09457300  |
| H | -3.15093900 | 1.95272700  | 3.03910500  |
| H | 0.51826900  | -1.90045000 | -0.94450400 |
| C | -0.08607300 | -0.06259900 | -2.32384100 |
| C | -2.45429100 | 4.27906300  | 1.25651000  |
| H | -3.17253400 | 4.62965000  | 0.51163600  |
| H | -2.80846600 | 4.58417000  | 2.24029200  |
| H | -1.50543100 | 4.78243700  | 1.06021200  |
| P | -2.04162000 | -2.06214200 | -1.56378100 |
| H | -3.40985300 | -1.70436800 | -1.67291700 |
| H | -1.85956500 | -2.47869600 | -2.89729600 |
| H | -2.24671700 | -3.33814000 | -0.98797500 |
| H | -0.07206200 | -3.25667400 | 1.19818200  |
| H | -0.98856600 | -4.19985500 | 3.30595600  |
| H | -0.70234000 | 2.56569600  | -0.29884700 |
| C | 1.42975600  | 1.65656100  | -0.19967800 |
| H | 0.82991200  | 0.49695400  | -0.08590700 |
| C | 2.87240400  | 1.33928300  | -0.08464300 |
| C | 3.33135700  | 0.02899000  | 0.00827200  |
| C | 3.79203900  | 2.39418500  | -0.07019600 |
| C | 4.69288800  | -0.23100100 | 0.11472800  |

|   |            |             |             |
|---|------------|-------------|-------------|
| H | 2.61295600 | -0.78157600 | -0.01757100 |
| C | 5.14849600 | 2.13170300  | 0.03905600  |
| H | 3.42160700 | 3.40771200  | -0.14702700 |
| C | 5.60378400 | 0.81808800  | 0.13221300  |
| H | 5.04178200 | -1.25404600 | 0.18125000  |
| H | 5.85539400 | 2.95215300  | 0.04956200  |
| H | 6.66450500 | 0.61607000  | 0.21544300  |
| N | 0.79562800 | 2.67129300  | -0.36167400 |

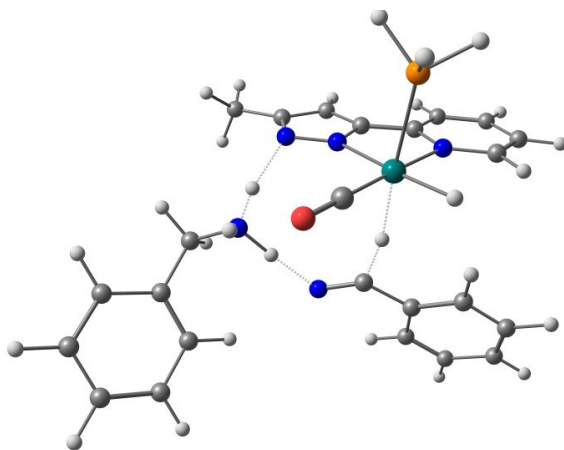

TS2

|                                                | Energy (in Hartrees)     |
|------------------------------------------------|--------------------------|
| EE                                             | -1717.2491               |
| Thermal free energy corrections                | 0.3988                   |
| EE+E <sub>thermal free energy correction</sub> | -1716.850                |
| Imaginary frequency                            | -290.25 cm <sup>-1</sup> |

0 1

|    |             |             |             |
|----|-------------|-------------|-------------|
| Ru | -0.61927600 | -0.04407800 | 1.06746900  |
| O  | -1.44921600 | -2.74638200 | 2.02579000  |
| N  | 0.03179700  | 1.88359400  | 0.23451600  |
| N  | -1.88933100 | 0.28658000  | -0.67865500 |
| N  | -2.87110800 | -0.39538300 | -1.27851100 |
| C  | 1.02850500  | 2.63506900  | 0.72184600  |

---

|   |             |             |             |
|---|-------------|-------------|-------------|
| C | -0.66469200 | 2.33135400  | -0.84408800 |
| C | 1.38850600  | 3.85473200  | 0.17939000  |
| C | -0.34874700 | 3.55932000  | -1.43678300 |
| H | -0.91601600 | 3.89205900  | -2.29461500 |
| C | -1.71318400 | 1.46099900  | -1.31883700 |
| C | 0.68073200  | 4.32361100  | -0.92481600 |
| H | 0.93377600  | 5.27347800  | -1.37852600 |
| C | -3.33453400 | 0.34834100  | -2.31236100 |
| C | -2.63174200 | 1.54423400  | -2.37656700 |
| H | -2.76643300 | 2.34413900  | -3.08543900 |
| H | 0.53204500  | -0.03209800 | 2.20520500  |
| C | -1.12426900 | -1.68652500 | 1.67675400  |
| C | -4.43038700 | -0.15296300 | -3.19725800 |
| H | -5.26909500 | -0.53407700 | -2.61084500 |
| H | -4.80273600 | 0.64545600  | -3.83915400 |
| H | -4.08728100 | -0.96329100 | -3.84756100 |
| P | -1.92445600 | 1.01546200  | 2.61992300  |
| H | -2.11703000 | 0.40738300  | 3.87716200  |
| H | -1.51873000 | 2.28516700  | 3.09454100  |
| H | -3.28089800 | 1.35530500  | 2.38343000  |
| H | 1.54528700  | 2.22628800  | 1.57831700  |
| H | 2.20404000  | 4.41733900  | 0.61133200  |
| H | -2.54548200 | -2.02815300 | -1.13186800 |
| H | 0.50396800  | -0.92213800 | -0.00385000 |
| C | 1.14506200  | -1.70983200 | -0.99057800 |

|   |             |             |             |
|---|-------------|-------------|-------------|
| N | 0.50343300  | -2.51678800 | -1.59116000 |
| C | 2.54477800  | -1.24347900 | -0.95009000 |
| C | 3.07065800  | -0.54990900 | 0.13535200  |
| C | 3.37054400  | -1.55566400 | -2.03658100 |
| C | 4.40951500  | -0.17606000 | 0.14198200  |
| H | 2.42097600  | -0.32148500 | 0.97069200  |
| C | 4.70156500  | -1.16772500 | -2.03158000 |
| H | 2.95195000  | -2.10191300 | -2.87113000 |
| C | 5.22626400  | -0.47855600 | -0.94098000 |
| H | 4.81566000  | 0.35137100  | 0.99626400  |
| H | 5.33344500  | -1.40594000 | -2.87820600 |
| H | 6.26766800  | -0.18138400 | -0.93689000 |
| H | -1.00398800 | -2.84678700 | -1.31214100 |
| N | -2.07018000 | -2.99460300 | -1.06426300 |
| H | -2.49109900 | -3.65154000 | -1.71352300 |
| H | -2.14711300 | -3.35301600 | -0.11447700 |

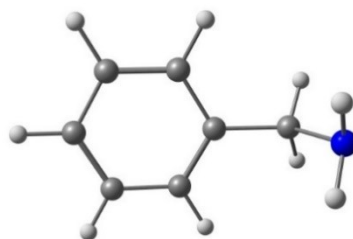

I

|                                                | Energy (in Hartrees) |
|------------------------------------------------|----------------------|
| EE                                             | -327.0366            |
| Thermal free energy corrections                | 0.1136               |
| EE+E <sub>thermal free energy correction</sub> | -326.923             |

O 1

|   |            |             |             |
|---|------------|-------------|-------------|
| N | 2.77669300 | 0.00009200  | 0.65895200  |
| C | 1.94528800 | -0.00013900 | -0.55284600 |

|   |             |             |             |
|---|-------------|-------------|-------------|
| H | 2.22371600  | -0.87665100 | -1.14240700 |
| H | 2.22379300  | 0.87607400  | -1.14281900 |
| C | 0.44946900  | -0.00005800 | -0.31688800 |
| C | -0.25379600 | -1.19847300 | -0.18303200 |
| C | -0.25370700 | 1.19842800  | -0.18311100 |
| C | -1.61711000 | -1.20167200 | 0.08844600  |
| H | 0.27149700  | -2.14045800 | -0.29897600 |
| C | -1.61700800 | 1.20174200  | 0.08836000  |
| H | 0.27167800  | 2.14035500  | -0.29912100 |
| C | -2.30290400 | 0.00006100  | 0.22728800  |
| H | -2.14584800 | -2.14199700 | 0.18492200  |
| H | -2.14569900 | 2.14210000  | 0.18476400  |
| H | -3.36550000 | 0.00012800  | 0.43495900  |
| H | 2.56402100  | -0.81200300 | 1.22854400  |
| H | 2.56410000  | 0.81246900  | 1.22816900  |

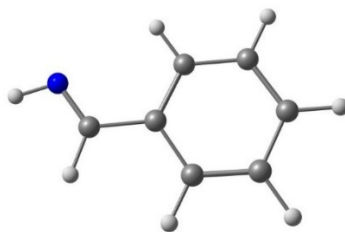

II

|                                                | Energy (in Hartrees) |
|------------------------------------------------|----------------------|
| EE                                             | -325.8335            |
| Thermal free energy corrections                | 0.0915               |
| EE+E <sub>thermal free energy correction</sub> | -325.742             |

0 1

|   |             |             |             |
|---|-------------|-------------|-------------|
| N | -2.84018300 | 0.44536200  | -0.00010300 |
| C | -1.96755300 | -0.47843300 | 0.00004300  |

|   |             |             |             |
|---|-------------|-------------|-------------|
| H | -2.23198100 | -1.54328300 | -0.00009700 |
| C | -0.52024500 | -0.20899200 | 0.00008000  |
| C | -0.02116100 | 1.09830600  | 0.00006500  |
| C | 0.37596400  | -1.27959600 | 0.00007200  |
| C | 1.34585300  | 1.32164800  | 0.00000600  |
| H | -0.72296000 | 1.92156700  | 0.00006400  |
| C | 1.74744500  | -1.05497500 | -0.00007200 |
| H | -0.00620100 | -2.29429800 | 0.00007900  |
| C | 2.23381000  | 0.24647900  | -0.00004500 |
| H | 1.72651400  | 2.33540500  | -0.00001300 |
| H | 2.43364000  | -1.89237800 | -0.00010700 |
| H | 3.30171000  | 0.42598400  | -0.00006200 |
| H | -3.78411700 | 0.06285200  | -0.00004500 |

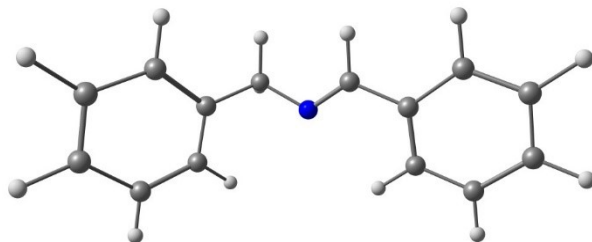

III

|                                                | Energy (in Hartrees) |
|------------------------------------------------|----------------------|
| EE                                             | -596.2783            |
| Thermal free energy corrections                | 0.1890               |
| EE+E <sub>thermal free energy correction</sub> | -596.09              |

0 1

|   |             |             |             |
|---|-------------|-------------|-------------|
| N | -0.02206500 | -0.29155900 | -0.87673900 |
| C | -1.00146600 | -0.94368000 | -0.40978600 |
| H | -0.92497400 | -2.02282500 | -0.20778100 |
| C | -2.30642200 | -0.34128100 | -0.09911800 |

---

|   |             |             |             |
|---|-------------|-------------|-------------|
| C | -2.55459600 | 1.02178000  | -0.29714600 |
| C | -3.32663600 | -1.14940600 | 0.40764100  |
| C | -3.79574200 | 1.55648400  | 0.00684300  |
| H | -1.76045000 | 1.64274400  | -0.68908900 |
| C | -4.57170400 | -0.61242500 | 0.71205700  |
| H | -3.14068400 | -2.20601400 | 0.56376900  |
| C | -4.80824900 | 0.74188400  | 0.51204300  |
| H | -3.98000900 | 2.61223000  | -0.14841300 |
| H | -5.35432200 | -1.24936800 | 1.10443400  |
| H | -5.77689000 | 1.16432200  | 0.74819900  |
| C | 1.21582400  | -1.00190000 | -1.14572000 |
| H | 1.38783200  | -0.95139000 | -2.22722300 |
| H | 1.14955100  | -2.06565400 | -0.87671500 |
| C | 2.39504700  | -0.37150700 | -0.43443800 |
| C | 3.23430400  | -1.14328900 | 0.36501300  |
| C | 2.67157300  | 0.98900500  | -0.58051300 |
| C | 4.33359000  | -0.57443400 | 1.00200500  |
| H | 3.02781200  | -2.19976100 | 0.49303700  |
| C | 3.76492600  | 1.56006800  | 0.05640400  |
| H | 2.01665200  | 1.59971600  | -1.18887100 |
| C | 4.60175200  | 0.77936100  | 0.84912400  |
| H | 4.97576700  | -1.18997300 | 1.61973400  |
| H | 3.96647000  | 2.61723100  | -0.06553400 |
| H | 5.45448600  | 1.22569000  | 1.34517500  |

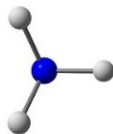

IV

|                                                | Energy (in Hartrees) |
|------------------------------------------------|----------------------|
| EE                                             | -56.5857             |
| Thermal free energy corrections                | 0.0161               |
| EE+E <sub>thermal free energy correction</sub> | -56.5695             |

0 1

|   |             |             |             |
|---|-------------|-------------|-------------|
| N | 0.00000000  | 0.00000000  | 0.11161700  |
| H | 0.00000000  | 0.94298400  | -0.26044100 |
| H | -0.81664800 | -0.47149200 | -0.26044100 |
| H | 0.81664800  | -0.47149200 | -0.26044100 |

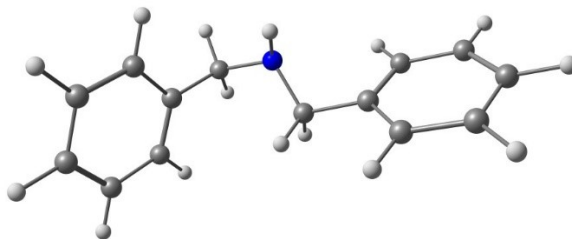

V

|                                                | Energy (in Hartrees) |
|------------------------------------------------|----------------------|
| EE                                             | -597.4896            |
| Thermal free energy corrections                | 0.2122               |
| EE+E <sub>thermal free energy correction</sub> | -597.28              |

0 1

|   |             |             |             |
|---|-------------|-------------|-------------|
| N | -0.11304000 | -1.33249100 | 0.27077700  |
| C | 1.24614800  | -1.78525100 | -0.03085900 |
| H | 1.22891800  | -2.24418400 | -1.02314300 |
| H | 1.48627900  | -2.57898600 | 0.68104900  |
| C | 2.33277000  | -0.72555300 | 0.01358800  |
| C | 2.85367400  | -0.16962700 | -1.15429300 |
| C | 2.81835900  | -0.26446200 | 1.23941500  |

---

|   |             |             |             |
|---|-------------|-------------|-------------|
| C | 3.82690400  | 0.82359700  | -1.10316300 |
| H | 2.49714400  | -0.52123600 | -2.11602100 |
| C | 3.78960200  | 0.72671500  | 1.29768000  |
| H | 2.43746900  | -0.69333900 | 2.16038500  |
| C | 4.29652500  | 1.27576900  | 0.12374300  |
| H | 4.21925000  | 1.24175200  | -2.02198100 |
| H | 4.15741000  | 1.06632600  | 2.25809100  |
| H | 5.05578200  | 2.04645800  | 0.16656900  |
| H | -0.16193500 | -0.97031400 | 1.21676800  |
| C | -0.66632400 | -0.35355200 | -0.66174000 |
| H | -0.06961200 | 0.56666300  | -0.73338300 |
| H | -0.64550500 | -0.81219500 | -1.65763300 |
| C | -2.08884500 | 0.01175900  | -0.30553100 |
| C | -3.04752000 | -0.98073600 | -0.08816800 |
| C | -2.47598800 | 1.34654600  | -0.20290900 |
| C | -4.35901700 | -0.64367200 | 0.21881200  |
| H | -2.75126100 | -2.02013300 | -0.15127100 |
| C | -3.79033600 | 1.68821400  | 0.10214100  |
| H | -1.74105500 | 2.12738900  | -0.36234100 |
| C | -4.73590200 | 0.69321000  | 0.31343300  |
| H | -5.09104900 | -1.42494600 | 0.38315000  |
| H | -4.07194300 | 2.73120200  | 0.17843700  |
| H | -5.75891100 | 0.95524000  | 0.55298600  |

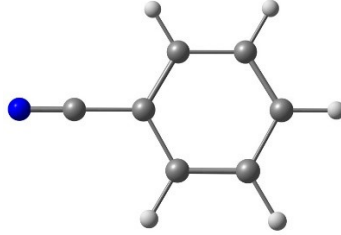

VI

|                                                | Energy (in Hartrees) |
|------------------------------------------------|----------------------|
| EE                                             | -324.6145            |
| Thermal free energy corrections                | 0.0687               |
| EE+E <sub>thermal free energy correction</sub> | -324.5458            |

0 1

|   |             |             |             |
|---|-------------|-------------|-------------|
| C | -1.47778600 | -1.20568200 | -0.00000100 |
| C | -0.09077700 | -1.21207100 | 0.00001600  |
| C | 0.60842400  | -0.00005000 | -0.00000300 |
| C | -0.09073500 | 1.21205200  | 0.00000700  |
| C | -1.47770400 | 1.20573200  | 0.00000700  |
| C | -2.17168700 | 0.00002500  | -0.00001300 |
| H | -2.01799300 | -2.14334100 | -0.00001300 |
| H | 0.45678700  | -2.14462400 | 0.00001100  |
| H | 0.45693500  | 2.14454300  | 0.00000300  |
| H | -2.01791400 | 2.14338900  | 0.00000100  |
| H | -3.25412300 | 0.00008000  | -0.00001200 |
| C | 2.03920100  | -0.00002900 | -0.00000700 |
| N | 3.19181400  | 0.00001300  | -0.00000400 |

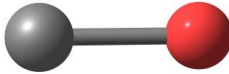

CO

|                                                | Energy (in Hartrees) |
|------------------------------------------------|----------------------|
| EE                                             | -113.362526          |
| Thermal free energy corrections                | -0.014072            |
| EE+E <sub>thermal free energy correction</sub> | -113.376598          |

0 1

C 0.51227600 -0.52414500 -1.28080800

O 1.63716600 -0.52414500 -1.28080800

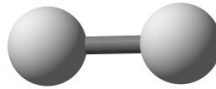

H2

|                                                | Energy (in Hartrees) |
|------------------------------------------------|----------------------|
| EE                                             | -1.179649            |
| Thermal free energy corrections                | -0.001416            |
| EE+E <sub>thermal free energy correction</sub> | -1.181065            |

0 1

H 3.42905997 0.38461538 0.00000000

H 2.82905997 0.38461538 0.00000000

## 6. Analytical Data of Secondary Amines

### *Bis-(4-methylbenzyl)amine, (2a)*

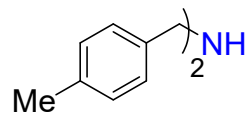

$^1\text{H NMR}$  (500 MHz,  $\text{CDCl}_3$ ):  $\delta$ (ppm) 7.28 (d,  $J = 7.7$  Hz, 2H), 7.11 (d,  $J = 7.7$  Hz, 1H), 3.50 (s, 4H), 2.32 (s, 6H).  $^{13}\text{C}\{^1\text{H}\}$  NMR (125 MHz,  $\text{CDCl}_3$ ):  $\delta$ (ppm)

136.99, 136.57, 129.18, 129.03, 57.73, 21.43.

### *Dibenzylamine, (2b)*

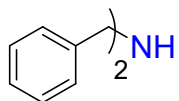

$^1\text{H NMR}$  (400 MHz,  $\text{CDCl}_3$ ):  $\delta$ (ppm) 7.35–7.25 (m, 10H), 3.82 (s, 4H).  $^{13}\text{C}\{^1\text{H}\}$

NMR (100 MHz,  $\text{CDCl}_3$ ):  $\delta$ (ppm) 140.43, 128.50, 128.25, 127.04, 53.28.

### *Bis-(4-methoxybenzyl)amine, (2c)*

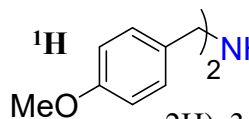

$^1\text{H NMR}$  (400 MHz,  $\text{CDCl}_3$ ):  $\delta$ (ppm) 7.21 (d,  $J = 8.6$  Hz, 2H), 6.86 (d,  $J = 8.6$  Hz, 2H), 3.50 (s, 4H), 2.32 (s, 6H).  $^{13}\text{C}\{^1\text{H}\}$  NMR (100 MHz,  $\text{CDCl}_3$ ):  $\delta$ (ppm) 158.59, 135.58,

128.36, 114.00, 55.37, 45.97.

### *Bis-(4-*t*-butylbenzyl)amine, (2d)*

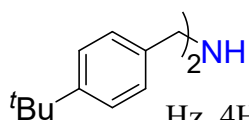

$^1\text{H NMR}$  (400 MHz,  $\text{CDCl}_3$ ):  $\delta$ (ppm) 7.36 (d,  $J = 8.56$  Hz, 4H), 7.23 (d,  $J = 8.56$  Hz, 4H), 3.82 (s, 4H), 1.31 (s, 18H).  $^{13}\text{C}\{^1\text{H}\}$  NMR (100 MHz,  $\text{CDCl}_3$ ):  $\delta$ (ppm) 149.81,

140.43, 126.88, 125.53, 46.21, 43.97, 31.30.

### *Bis-(2-aminobenzyl)amine, (2e)*

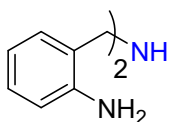

$^1\text{H NMR}$  (400 MHz,  $\text{CDCl}_3$ ):  $\delta$ (ppm) 8.61 (d,  $J = 7.96$  Hz, 2H), 7.67–7.63 (m, 4H), 7.41 (t,  $J = 7.96$  Hz, 2H), 1.24 (s, 4H).  $^{13}\text{C}\{^1\text{H}\}$  NMR (100 MHz,  $\text{CDCl}_3$ ):  $\delta$ (ppm)

134.65, 127.59, 126.73, 126.57, 29.78.ppm.

**Bis-(2,4-dimethoxybenzyl)amine, (2f)**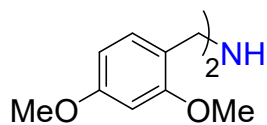

$^1\text{H NMR}$  (500 MHz,  $\text{CDCl}_3$ ):  $\delta$ (ppm) 7.08 (d,  $J = 8.0$  Hz, 2H), 6.44–6.39 (m, 4H), 3.80 (s, 6H), 3.78 (s, 6H), 3.72 (s, 4H).  $^{13}\text{C}\{^1\text{H}\}$  NMR (125 MHz,  $\text{CDCl}_3$ ):  $\delta$ (ppm) 159.93, 158.37, 129.00, 124.37, 103.64, 98.58, 55.31, 55.13, 42.08.

**Bis-(3,4-dimethoxybenzyl)amine, (2g)**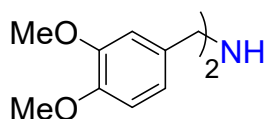

$^1\text{H NMR}$  (400 MHz,  $\text{CDCl}_3$ ):  $\delta$ (ppm) 6.92 (s, 2H), 6.89–6.87 (m, 2H), 6.80–6.78 (m, 2H), 3.86 (s, 6H), 3.84 (s, 6H), 3.49 (s, 4H).  $^{13}\text{C}\{^1\text{H}\}$  NMR (100 MHz,  $\text{CDCl}_3$ ):  $\delta$ (ppm) 148.92, 148.03, 132.28, 120.87, 111.93, 110.96, 57.32, 55.99, 55.84.

**Bis-(3-bromobenzyl)amine, (2h)**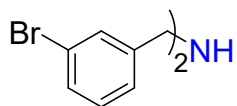

$^1\text{H NMR}$  (400 MHz,  $\text{CDCl}_3$ ):  $\delta$ (ppm) 7.46 (s, 2H), 7.35 (d,  $J = 7.32$  Hz, 2H), 7.25–7.15 (m, 4H), 3.83 (s, 4H).  $^{13}\text{C}\{^1\text{H}\}$  NMR (100 MHz,  $\text{CDCl}_3$ ):  $\delta$ (ppm) 145.59, 130.26, 130.19, 129.94, 125.77, 122.72, 46.00.

**Bis-(4-chlorobenzyl)amine, (2i)**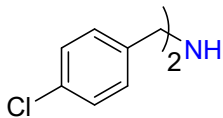

$^1\text{H NMR}$  (400 MHz,  $\text{CDCl}_3$ ):  $\delta$ (ppm) 7.30–7.24 (m, 8H), 3.74 (s, 4H).  $^{13}\text{C}\{^1\text{H}\}$  NMR (100 MHz,  $\text{CDCl}_3$ ):  $\delta$ (ppm) 138.63, 137.79, 129.55, 128.64, 52.38.

**Bis-(4-fluorobenzyl)amine, (2j)**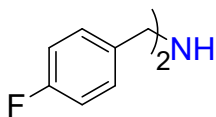

$^1\text{H NMR}$  (500 MHz,  $\text{CDCl}_3$ ):  $\delta$ (ppm) 7.21–7.19 (m, 4H), 6.92 (t, 4H), 3.67 (s, 4H).  $^{13}\text{C}\{^1\text{H}\}$  NMR (125 MHz,  $\text{CDCl}_3$ ):  $\delta$ (ppm) 135.86, 132.03, 129.58, 128.43, 52.33.

**Bis-(phenethyl)amine, (2k)**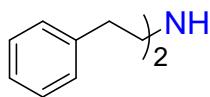

$^1\text{H NMR}$  (400 MHz,  $\text{CDCl}_3$ ):  $\delta$ (ppm) 7.30–7.24 (m, 4H), 7.21–7.17 (m, 6H), 2.95 (t,  $J = 6.72$  Hz, 4H), 2.74 (t,  $J = 6.72$ , 4H).  $^{13}\text{C}\{^1\text{H}\}$  NMR (100 MHz,  $\text{CDCl}_3$ ):  $\delta$ (ppm) 139.89, 128.92, 128.54, 126.25, 43.64, 40.18.

**Bis-(3-methoxyphenethyl)amine, (2l)**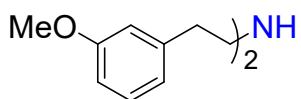

$^1\text{H NMR}$  (400 MHz,  $\text{CDCl}_3$ ):  $\delta$ (ppm) 7.21–7.17 (m, 2H), 6.77–6.72 (m, 6H), 3.77 (s, 6H), 2.93 (t,  $J = 6.72$  Hz, 4H), 2.69 (t,  $J = 6.72$  Hz, 4H).

$^{13}\text{C}\{^1\text{H}\}$  NMR (100 MHz,  $\text{CDCl}_3$ ):  $\delta$ (ppm) 159.78, 141.51, 129.41, 121.29, 114.68, 111.47, 55.19, 43.47, 40.17.

**Bis-(4-methylphenethyl)amine, (2m)**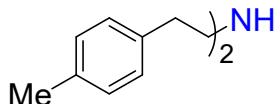

$^1\text{H NMR}$  (400 MHz,  $\text{CDCl}_3$ ):  $\delta$ (ppm) 7.10–7.05 (m, 8H), 2.94–2.90 (m, 4H), 2.69 (t,  $J = 6.72$  Hz, 4H), 2.30 (s, 6H).  $^{13}\text{C}\{^1\text{H}\}$  NMR (100 MHz,  $\text{CDCl}_3$ ):  $\delta$ (ppm) 136.80, 135.67, 129.21, 128.78, 43.74, 39.77, 21.07.

**Bis-(4-methoxyphenethyl)amine, (2n)**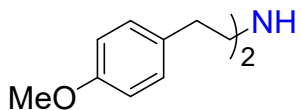

$^1\text{H NMR}$  (500 MHz,  $\text{CDCl}_3$ ):  $\delta$ (ppm) 7.11 (d,  $J = 8.6$  Hz 4H), 6.84 (d,  $J = 8.75$  Hz 4H), 3.78 (s, 6H), 2.92 (t,  $J = 6.85$  Hz, 4H), 2.68 (t,  $J = 6.9$  Hz 4H).

$^{13}\text{C}\{^1\text{H}\}$  NMR (125 MHz,  $\text{CDCl}_3$ ):  $\delta$ (ppm) 158.39, 132.24, 130.08, 114.23, 55.60, 44.10, 39.56.

**Bis-(3,4-dichlorophenethyl)amine, (2o)**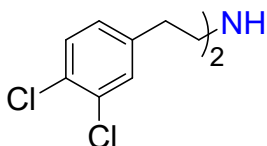

$^1\text{H NMR}$  (500 MHz,  $\text{CDCl}_3$ ):  $\delta$ (ppm) 7.28 (d,  $J = 8.05$  Hz, 2H), 7.21 (d,  $J = 2.3$  Hz, 2H), 6.96–6.95 (m, 2H), 2.87 (t,  $J = 6.95$  Hz, 4H) 2.63 (t,  $J = 6.95$

Hz, 4H).  $^{13}\text{C}\{^1\text{H}\}$  NMR (125 MHz,  $\text{CDCl}_3$ ):  $\delta(\text{ppm})$  140.01, 132.38, 130.66, 130.30, 130.14, 128.22, 43.00, 38.89.

***Bis-(3-phenylpropyl)amine, (2p)***

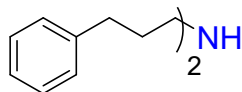

$^1\text{H}$  NMR (400 MHz,  $\text{CDCl}_3$ ):  $\delta(\text{ppm})$  7.28–7.24 (m, 4H), 7.18–7.14 (m, 6H), 2.71 (t,  $J = 7.32$  Hz, 4H), 2.63 (t,  $J = 7.32$  Hz, 4H), 1.79–1.72 (m, 4H).  $^{13}\text{C}\{^1\text{H}\}$

NMR (100 MHz,  $\text{CDCl}_3$ ):  $\delta(\text{ppm})$  142.19, 128.42, 125.83, 41.83, 35.46, 33.32.

***Bis-(2-picolyl)amine, (2q)***

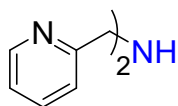

$^1\text{H}$  NMR (500 MHz,  $\text{CDCl}_3$ ):  $\delta(\text{ppm})$  8.54 (d,  $J = 3.85$  Hz, 2H), 7.56–7.53 (m, 2H), 7.12–7.08 (m, 4H), 3.22 (s, 4H).  $^{13}\text{C}\{^1\text{H}\}$  NMR (125 MHz,  $\text{CDCl}_3$ ):  $\delta(\text{ppm})$

162.27, 149.61, 136.86, 122.11, 121.52, 48.15.

***Bis-(2-thiophenethyl)amine, (2r)***

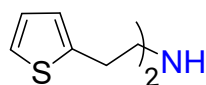

$^1\text{H}$  NMR (500 MHz,  $\text{CDCl}_3$ ):  $\delta(\text{ppm})$  7.14–7.13 (m, 2H), 6.94–6.92 (m, 2H), 6.82 (d,  $J = 2.9$  Hz, 2H), 2.99–2.94 (m, 8H).  $^{13}\text{C}\{^1\text{H}\}$  NMR (125 MHz,  $\text{CDCl}_3$ ):

$\delta(\text{ppm})$  142.67, 127.23, 125.41, 123.89, 44.07, 34.53.

***Bis-(cyclohexyl)amine, (2s)***

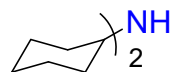

$^1\text{H}$  NMR (500 MHz,  $\text{CDCl}_3$ ):  $\delta(\text{ppm})$  2.56–2.51 (m, 2H), 1.85–1.83 (m, 4H), 1.72–1.69 (m, 4H), 1.61–1.58 (m, 2H), 1.28–1.20 (m, 4H), 1.16–1.09 (m, 2H),

1.04–0.97 (m, 4H).  $^{13}\text{C}\{^1\text{H}\}$  NMR (125 MHz,  $\text{CDCl}_3$ ):  $\delta(\text{ppm})$  53.42, 34.70, 26.56, 25.67.

***Bis-(sec-butyl)amine, (2t)***

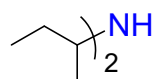

$^1\text{H}$  NMR (500 MHz,  $\text{CDCl}_3$ ):  $\delta(\text{ppm})$  2.38–2.37 (m, 4H), 1.77–1.69 (m, 2H), 0.89–0.87 (m, 12H).  $^{13}\text{C}\{^1\text{H}\}$  NMR (125 MHz,  $\text{CDCl}_3$ ):  $\delta(\text{ppm})$  58.33, 28.57, 21.00.

**Bis-(n-octyl)amine, (2u)**

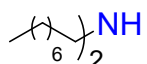 **<sup>1</sup>H NMR** (500 MHz, CDCl<sub>3</sub>): δ(ppm) 2.59–2.56 (m, 4H), 1.32–1.26 (m, 24H), 0.88–0.85 (m, 6H). **<sup>13</sup>C{<sup>1</sup>H} NMR** (125 MHz, CDCl<sub>3</sub>): δ(ppm) 50.48, 32.17, 30.48, 29.89, 29.61, 27.77, 22.99, 14.43.

**Bis-(tridecyl)amine, (2v)**

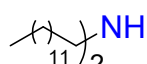 **<sup>1</sup>H NMR** (500 MHz, CDCl<sub>3</sub>): δ(ppm) 2.63 (t, *J* = 7.0 Hz, 4H), 1.26–1.22 (m, 44H), 0.85–0.83 (m, 6H). **<sup>13</sup>C{<sup>1</sup>H} NMR** (125 MHz, CDCl<sub>3</sub>): δ(ppm) 42.62, 34.24, 32.25, 29.98, 29.85, 28.68, 27.24, 23.02, 14.43.

**Bis-(hexadecyl)amine, (2w)**

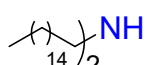 **<sup>1</sup>H NMR** (500 MHz, CDCl<sub>3</sub>): δ(ppm) 2.66 (t, *J* = 7.0 Hz, 4H), 1.30–1.22 (m, 56H), 0.88–0.85 (m, 6H). **<sup>13</sup>C{<sup>1</sup>H} NMR** (125 MHz, CDCl<sub>3</sub>): δ(ppm) 42.66, 34.27, 32.77, 30.04, 29.87, 29.71, 27.25, 23.03, 14.45.

7.  $^1\text{H}$  and  $^{13}\text{C}$  NMR Spectra of Secondary Amines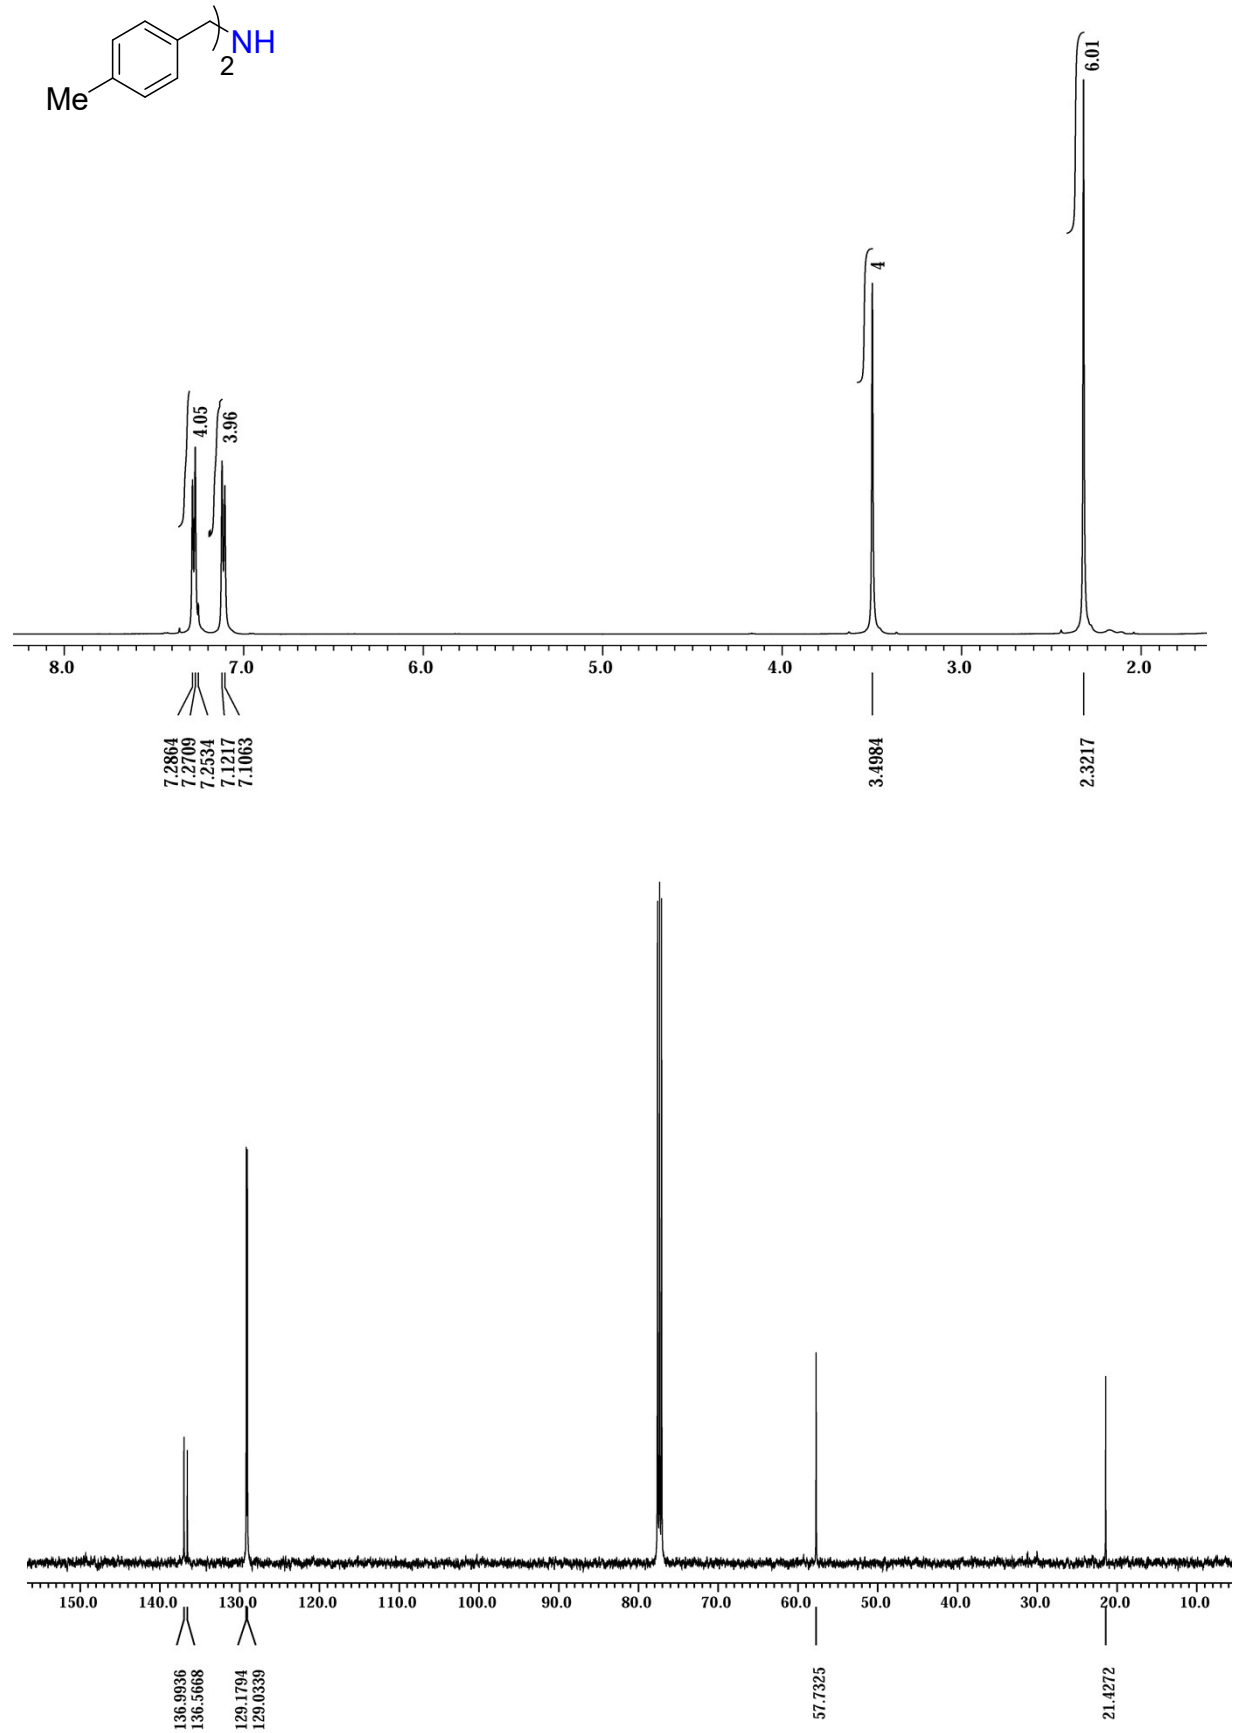

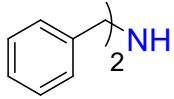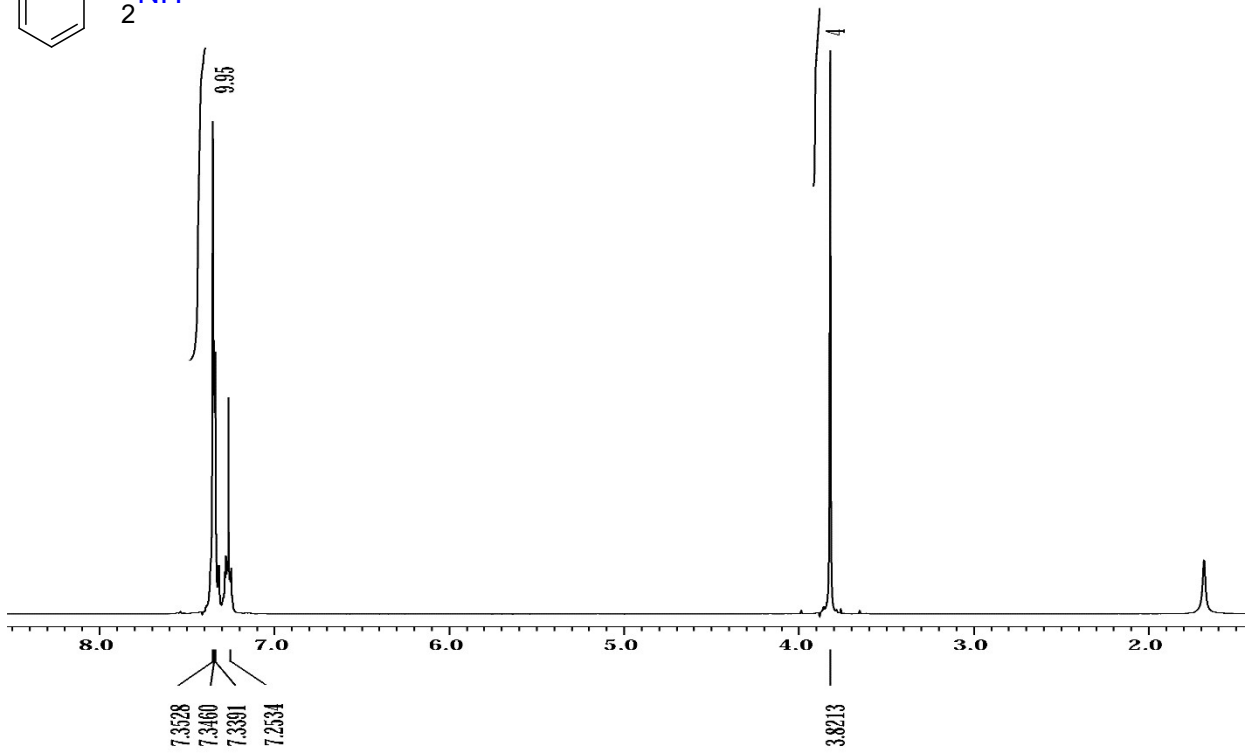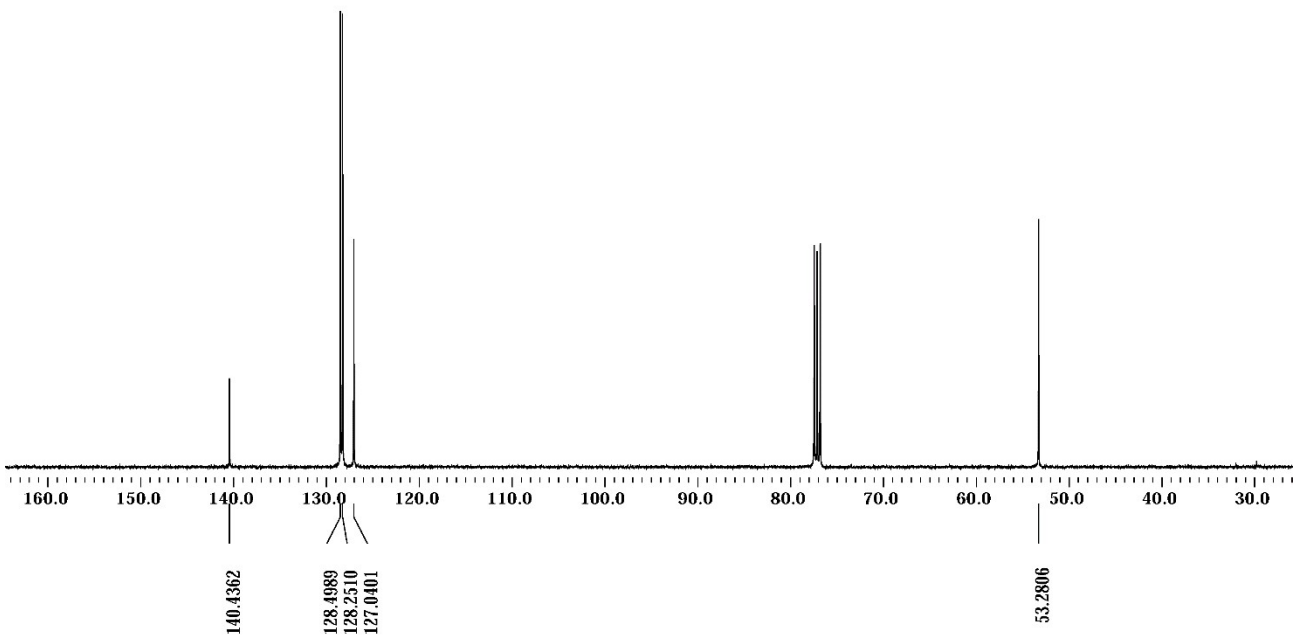

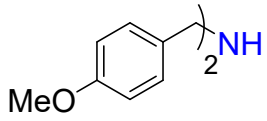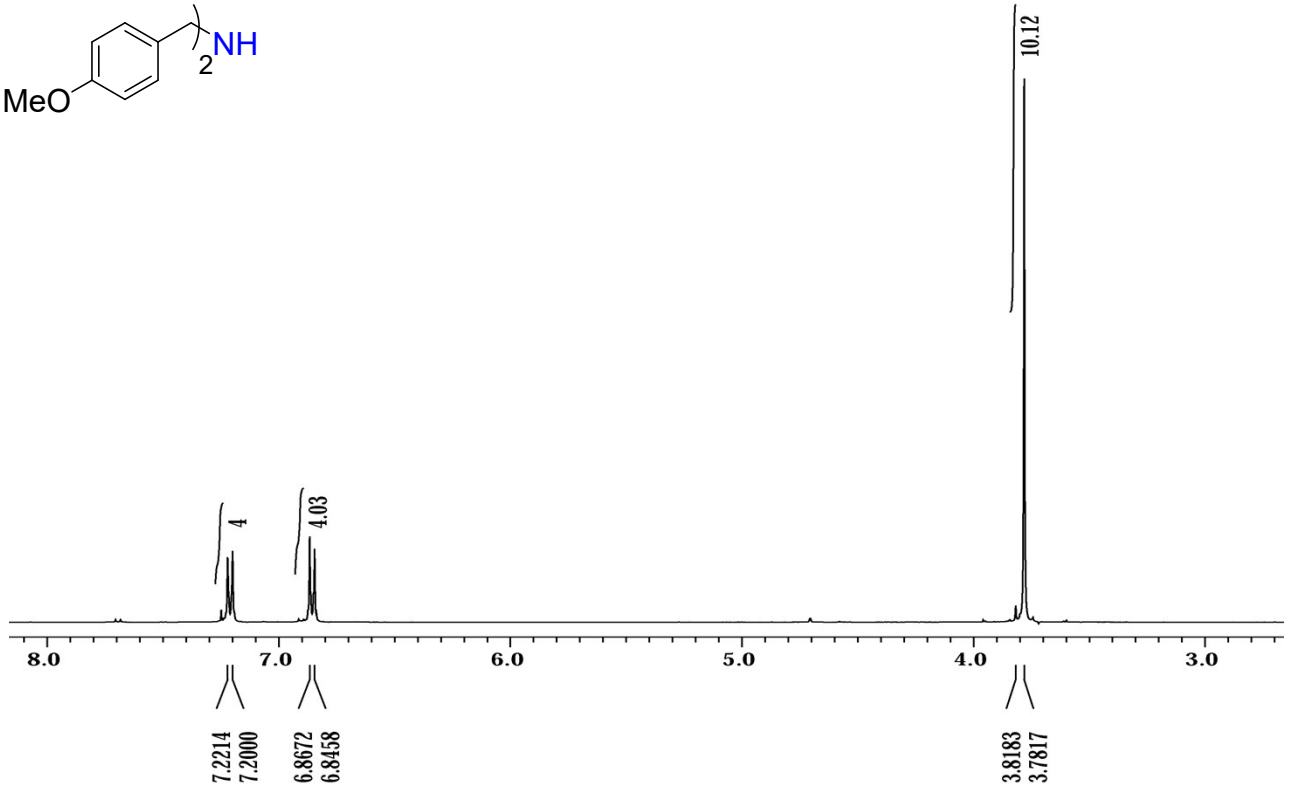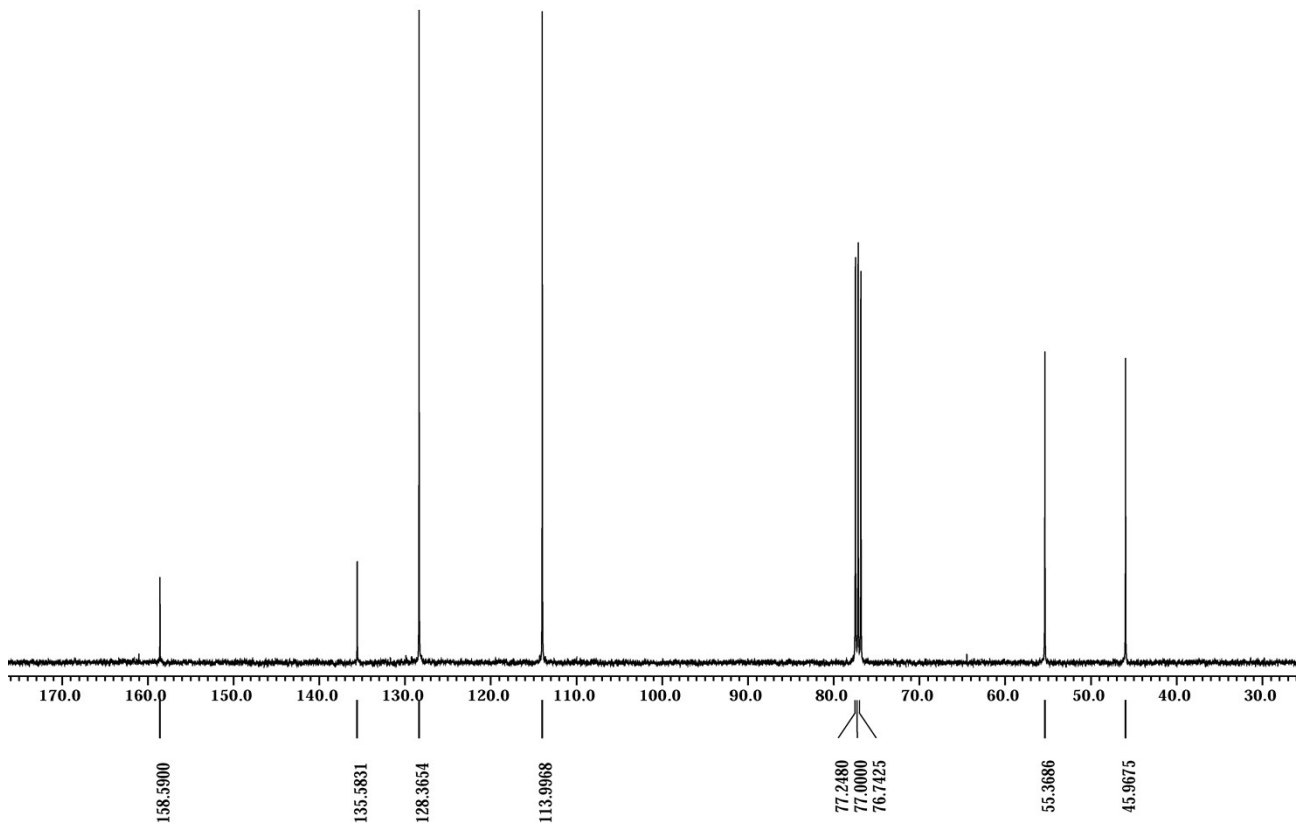

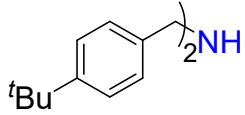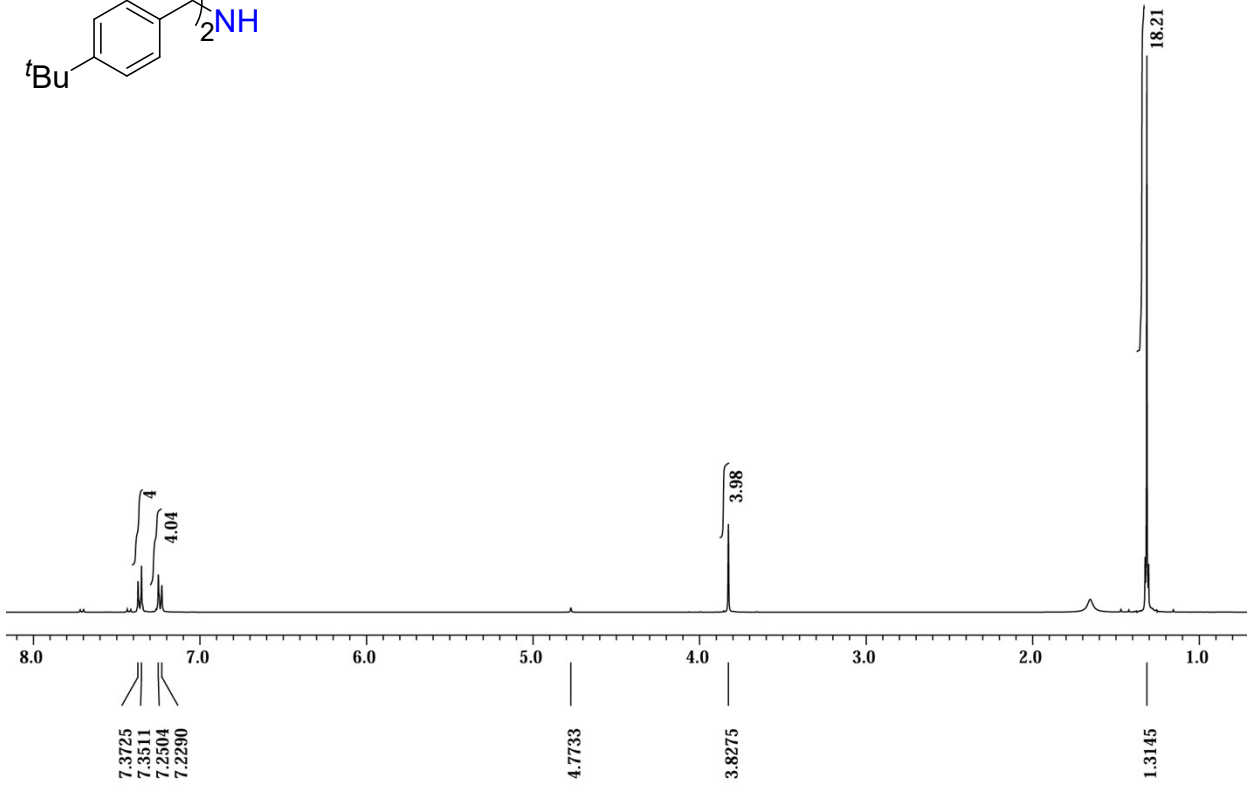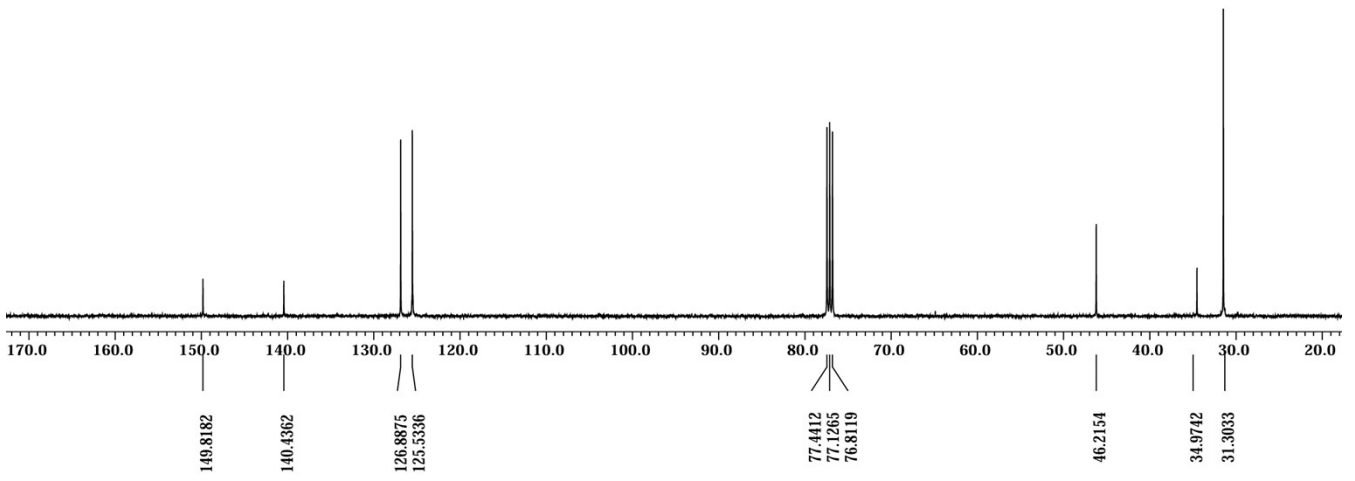

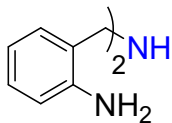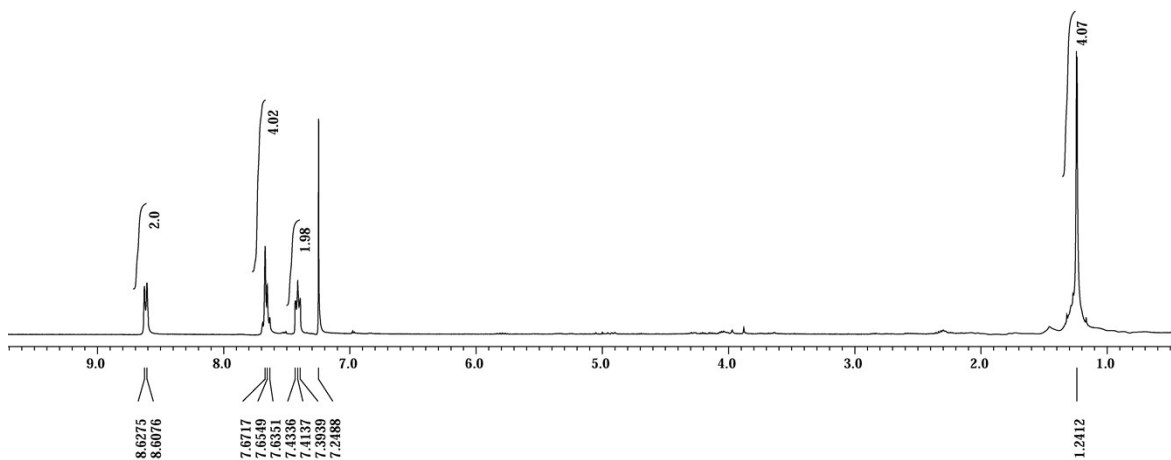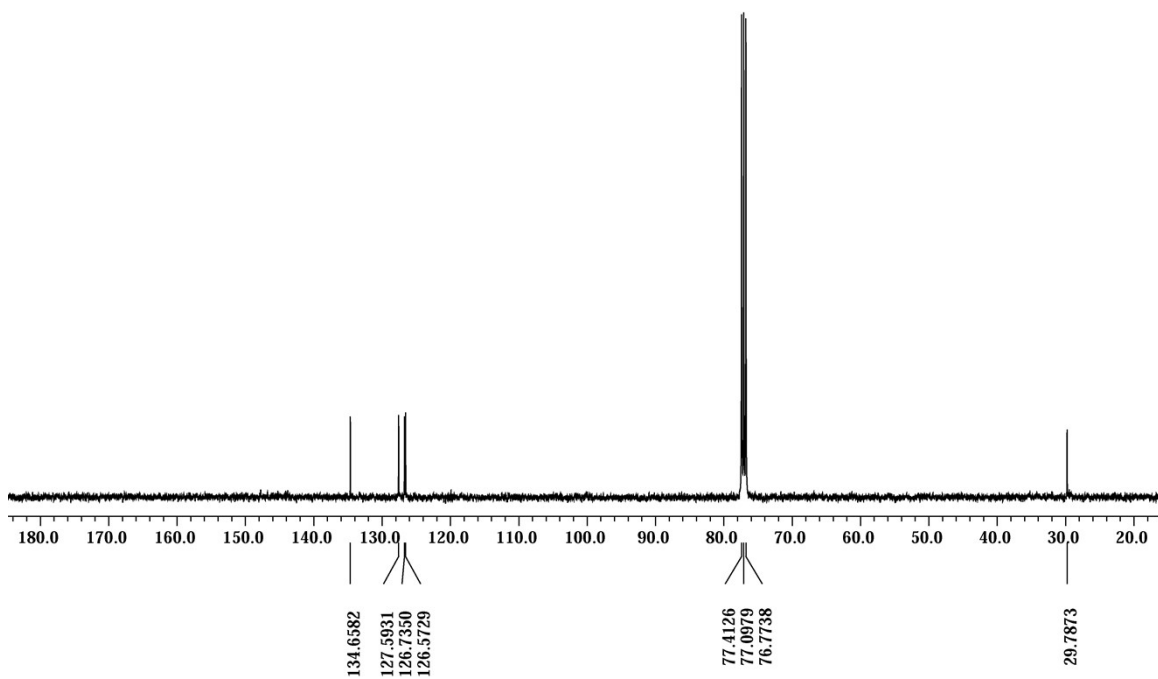

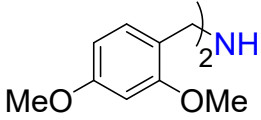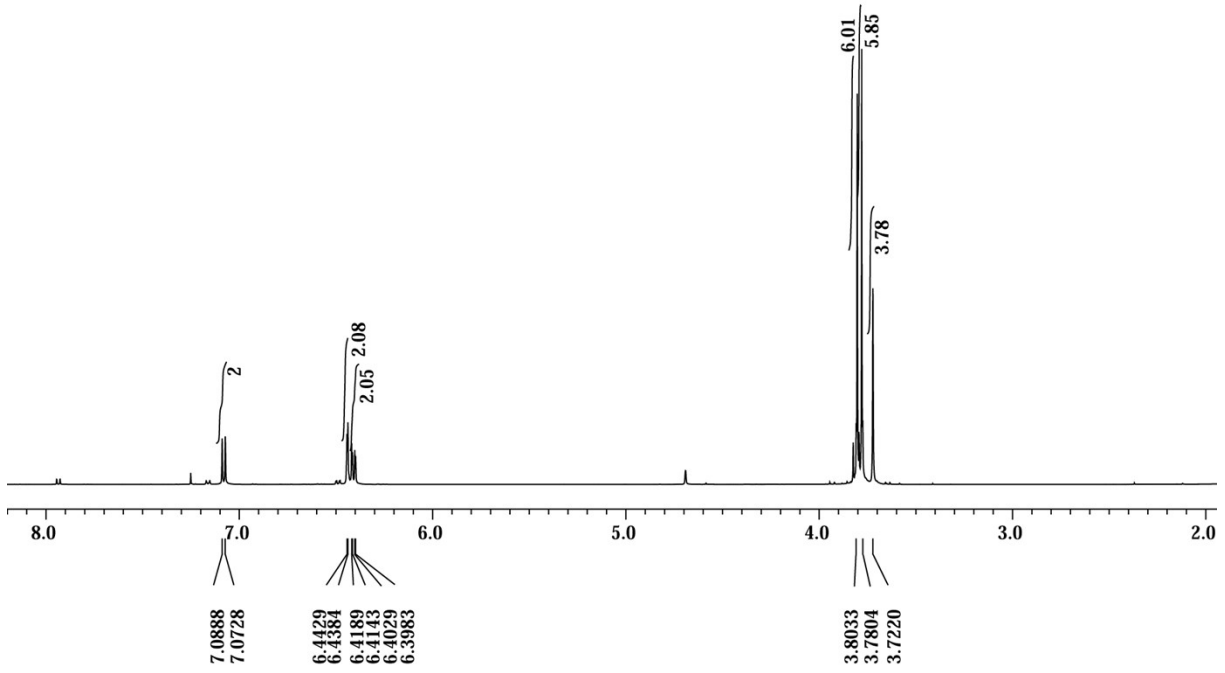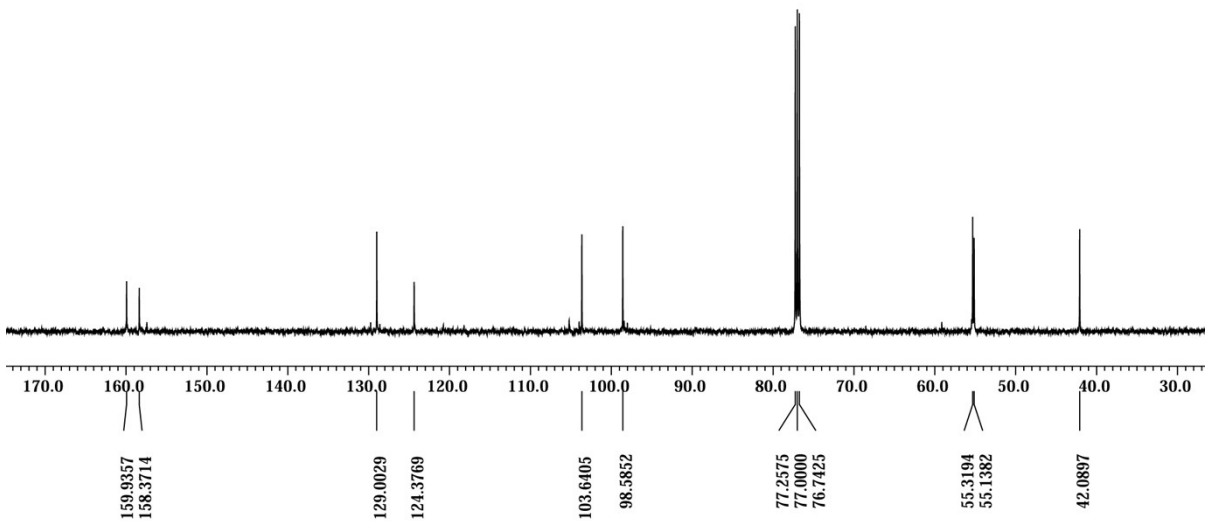

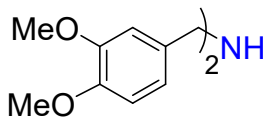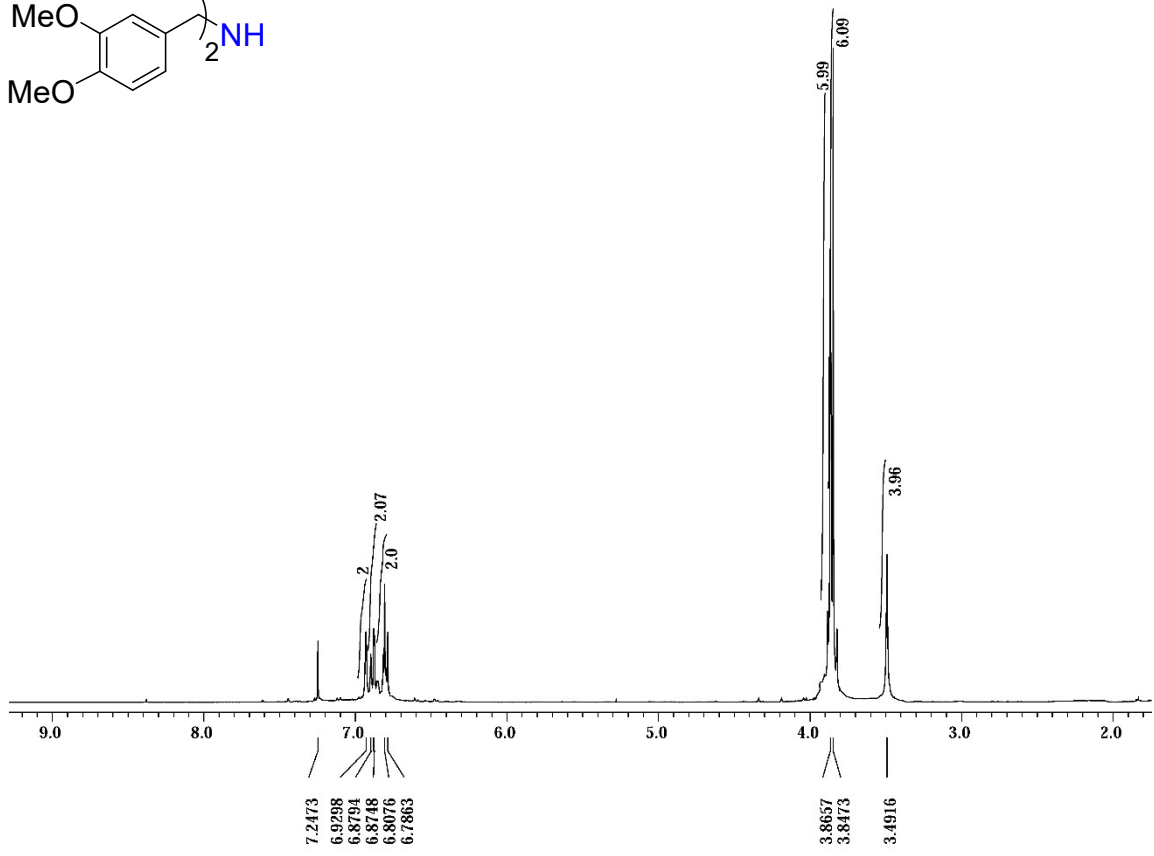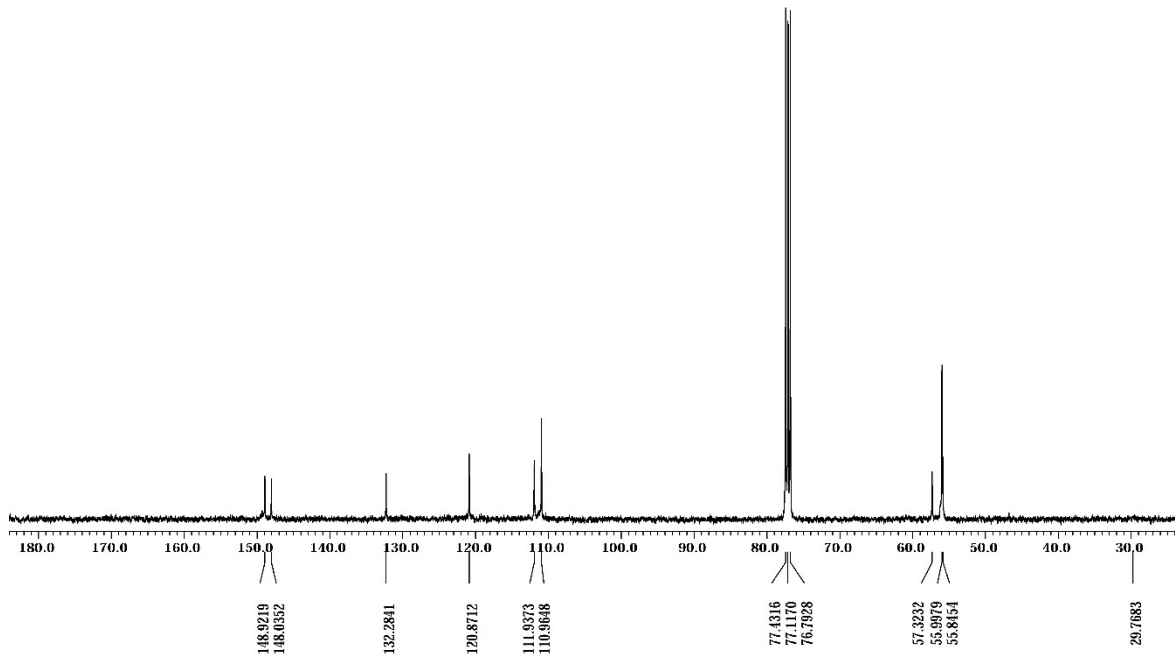

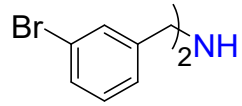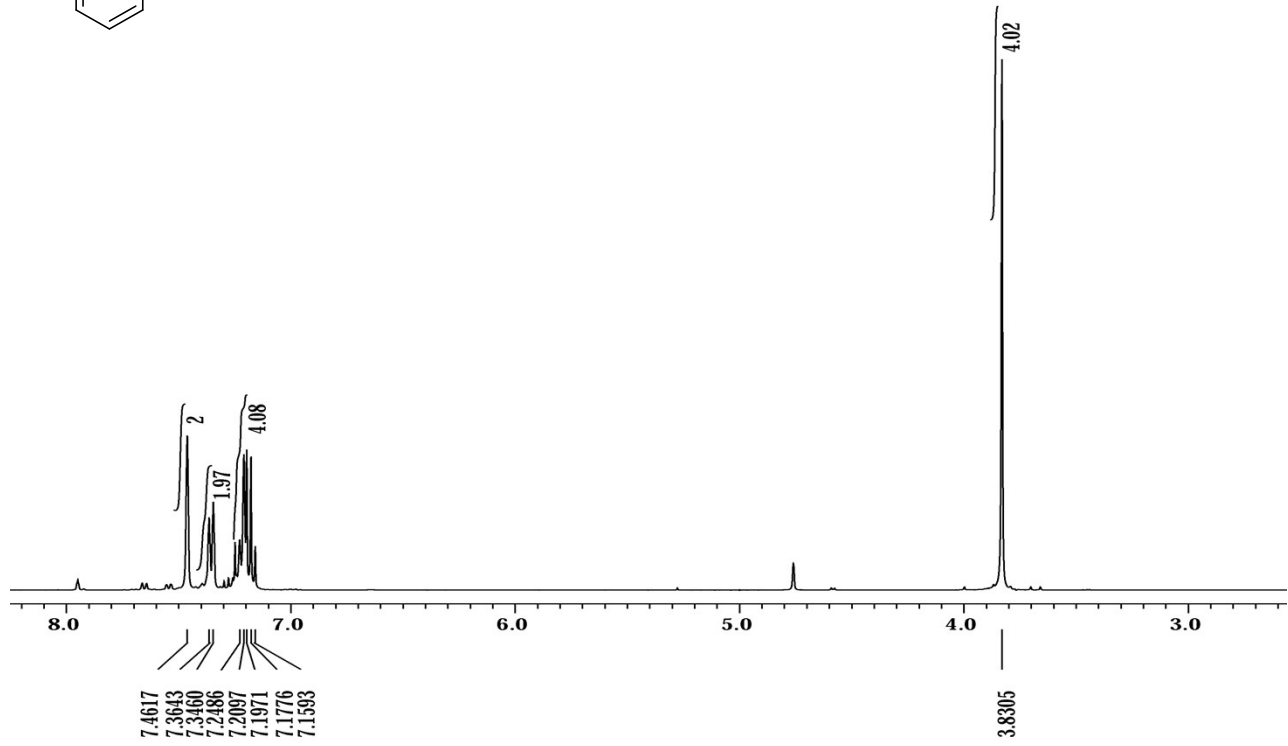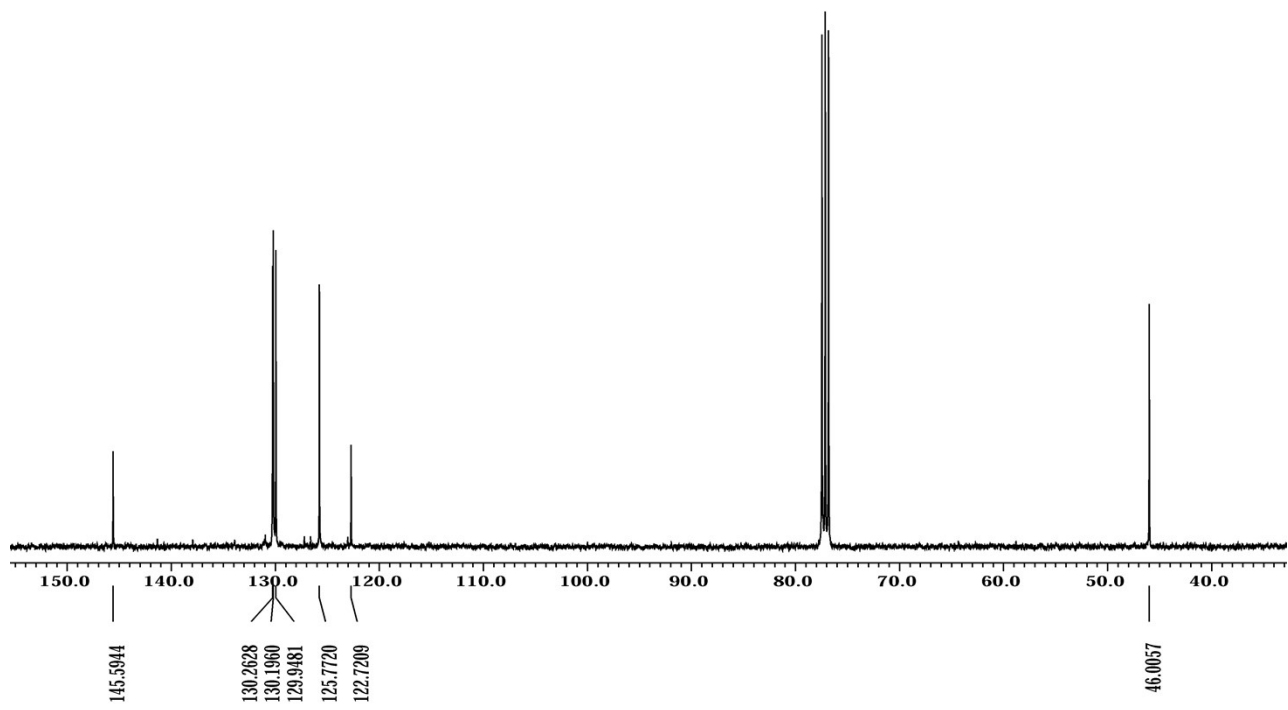

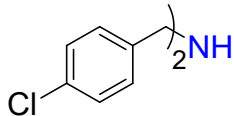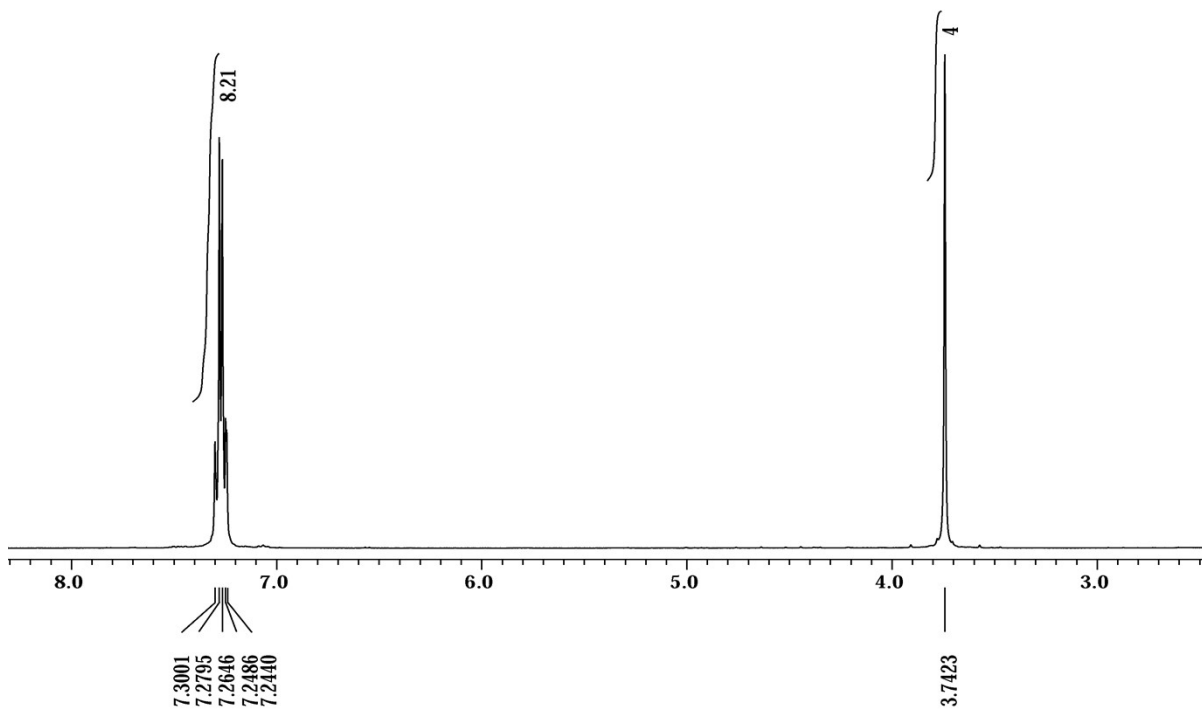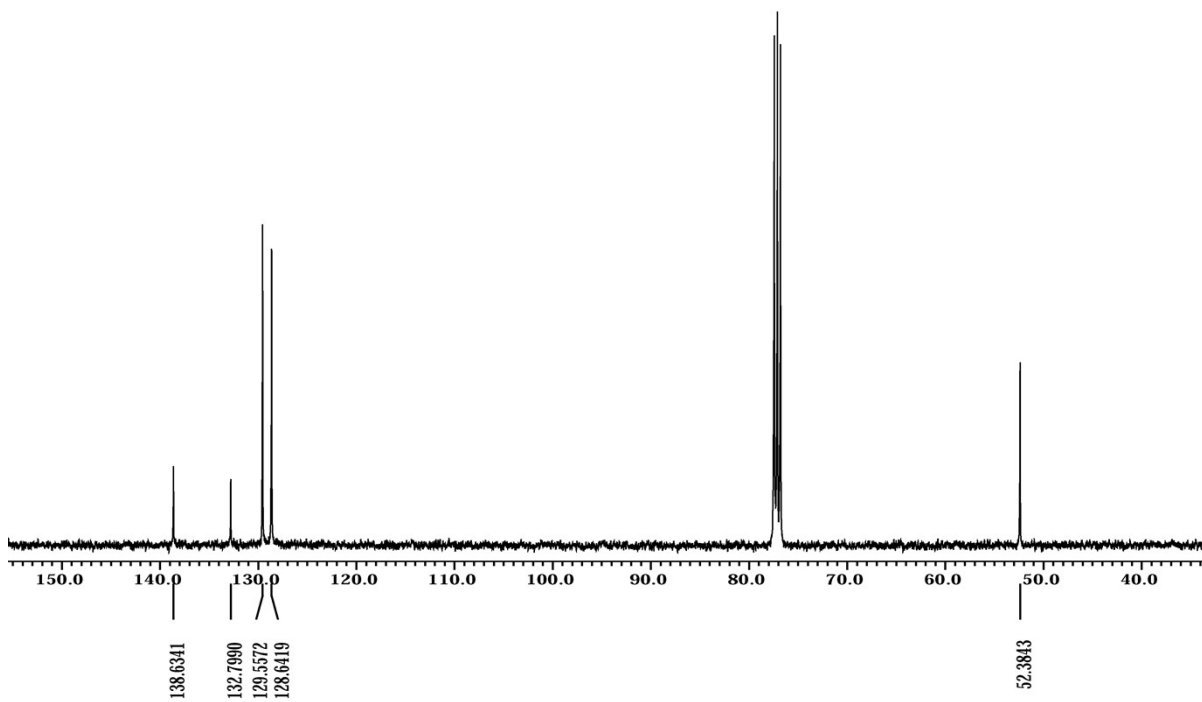

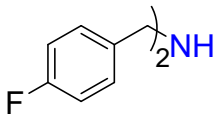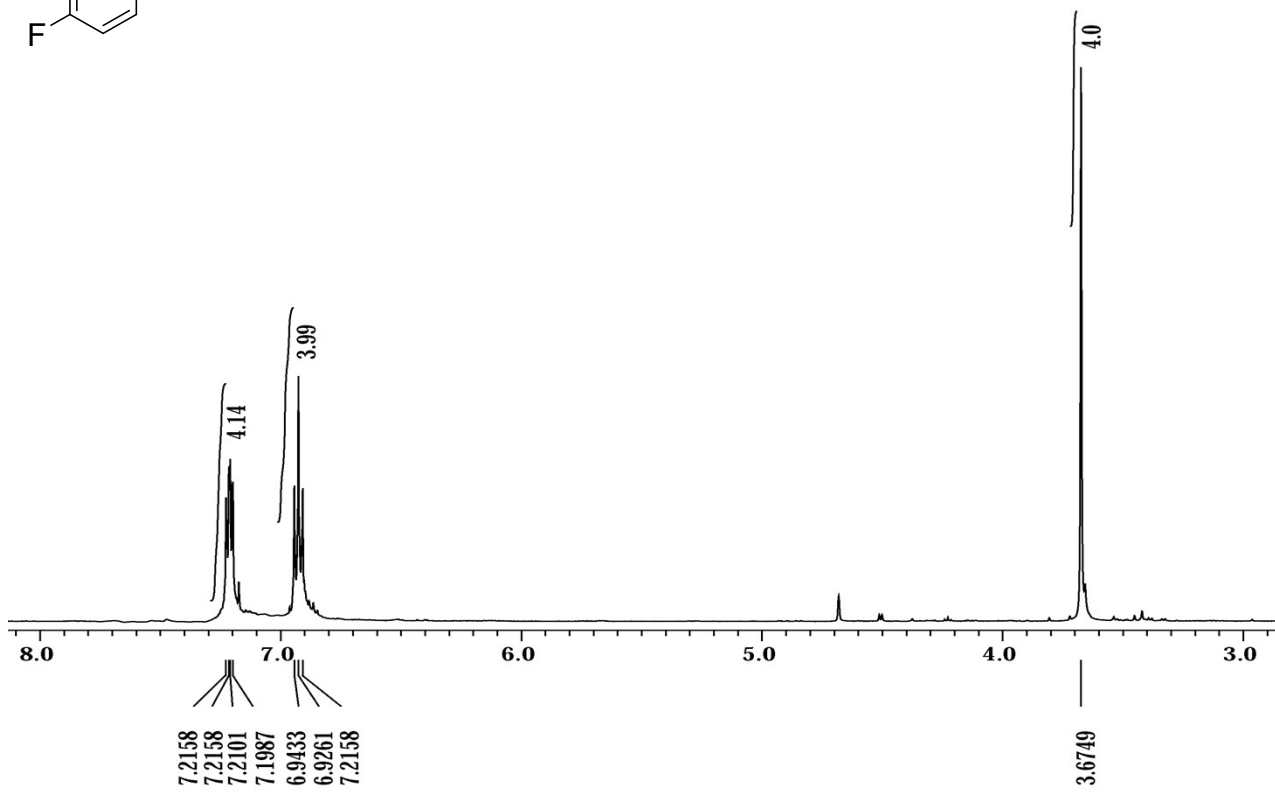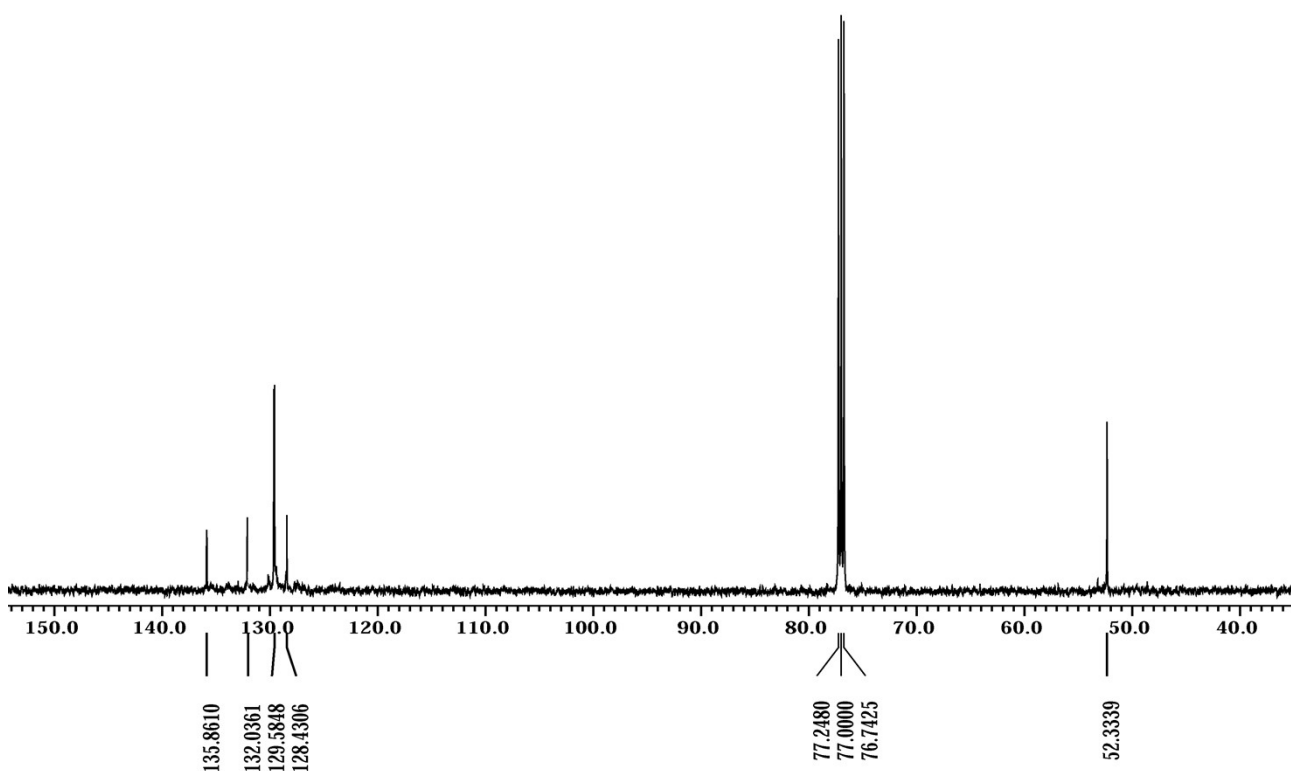

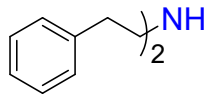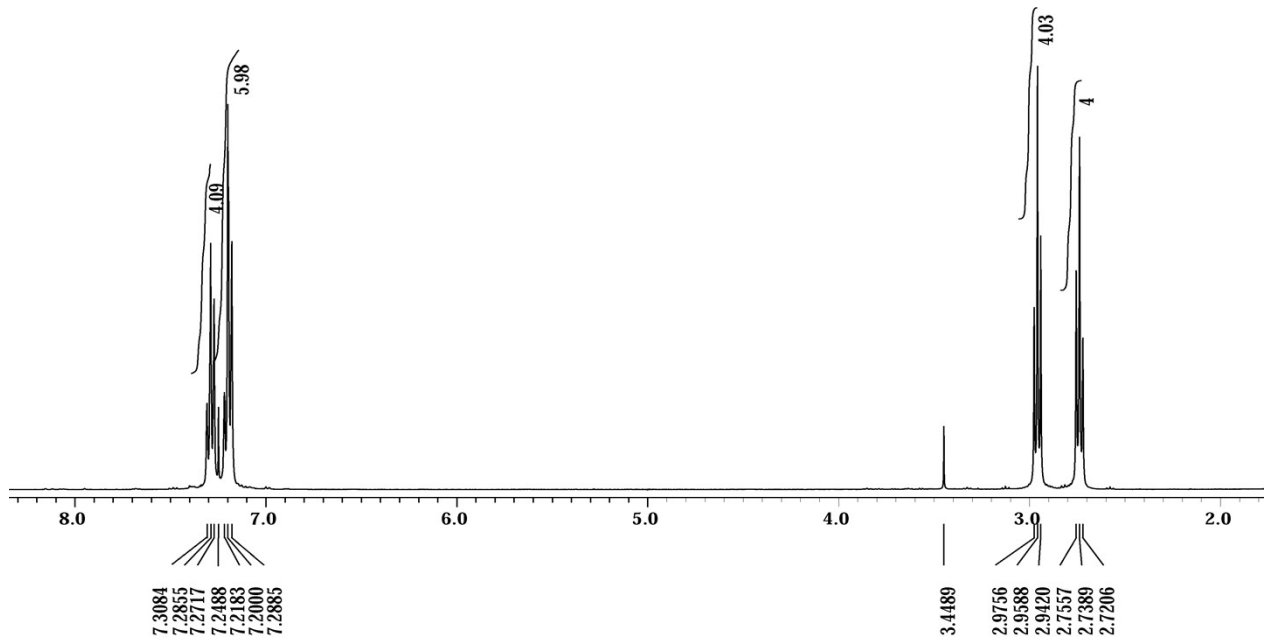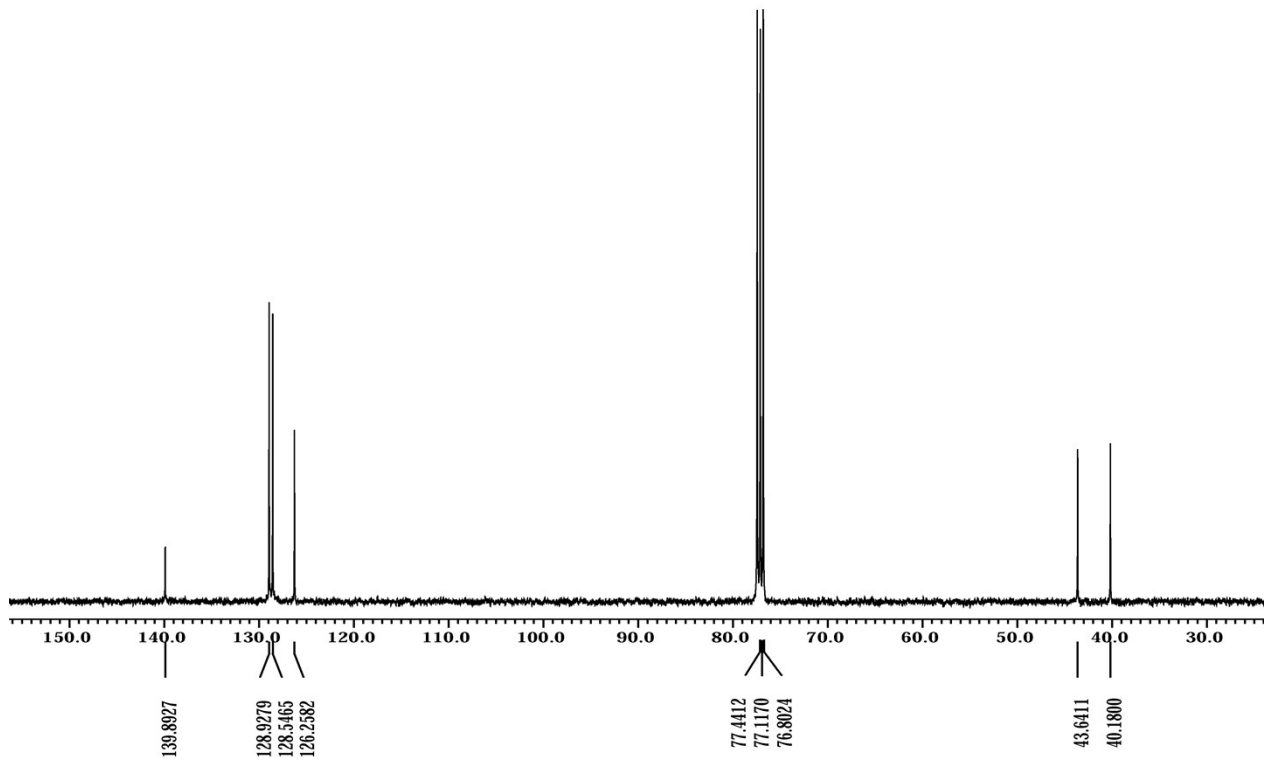

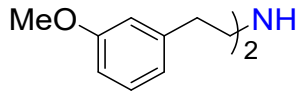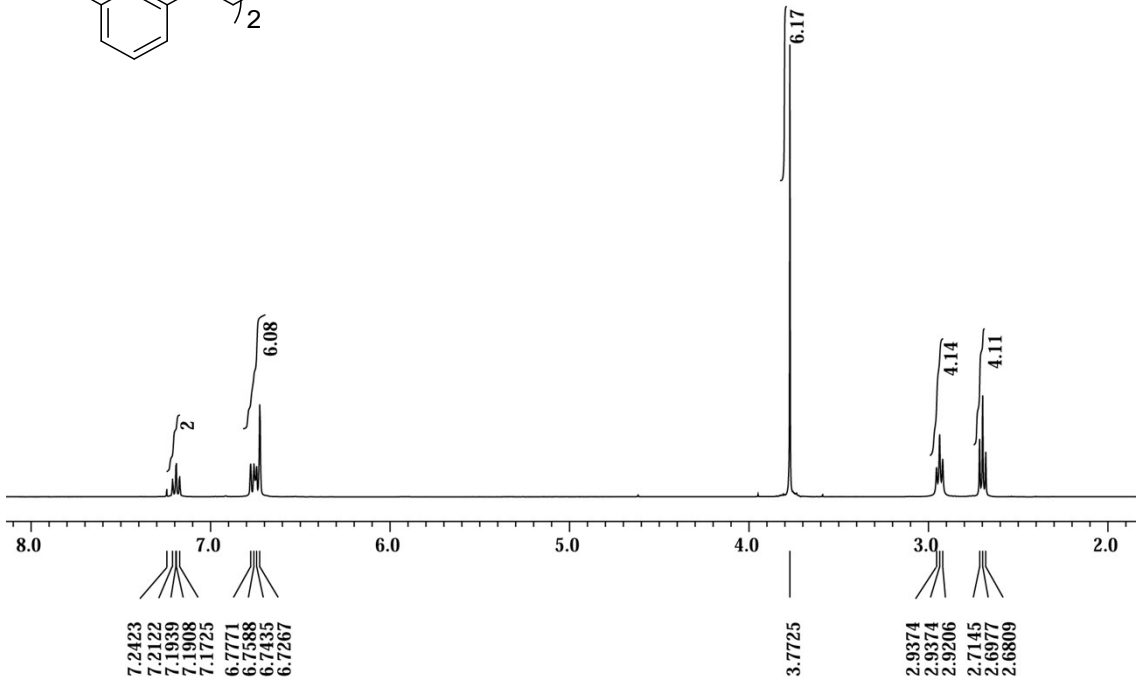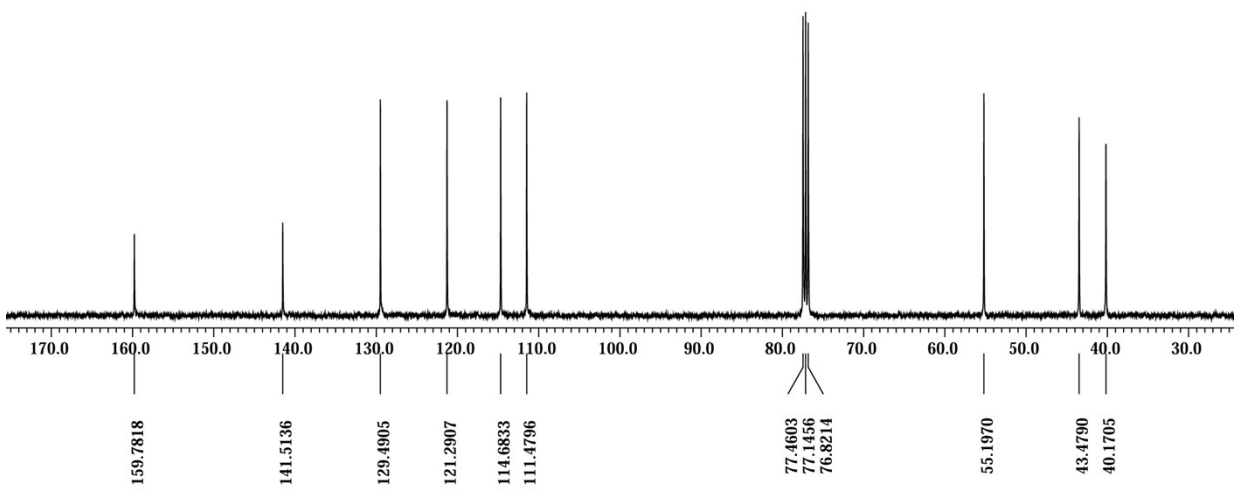

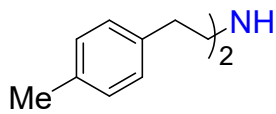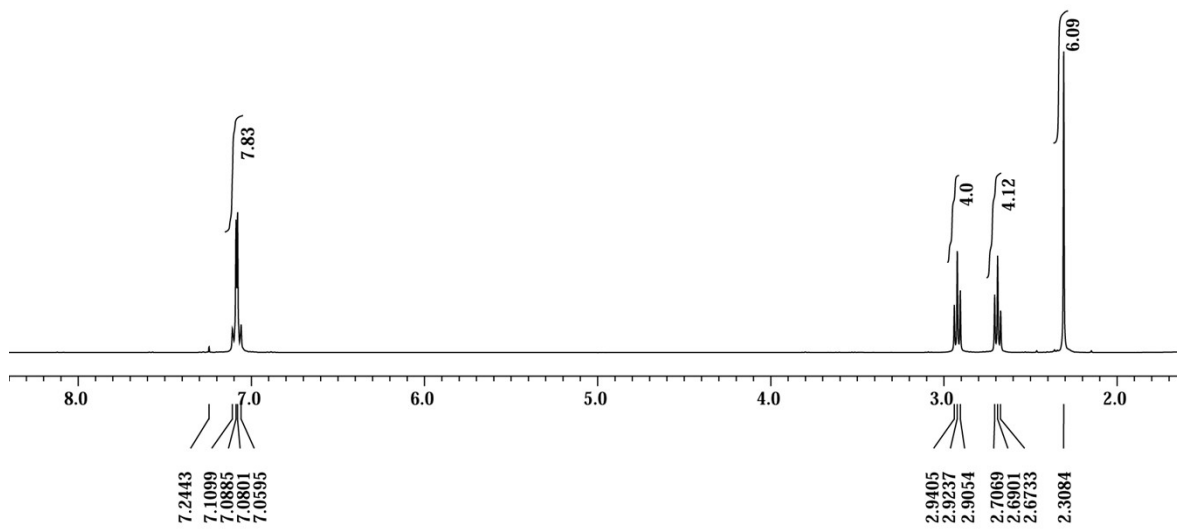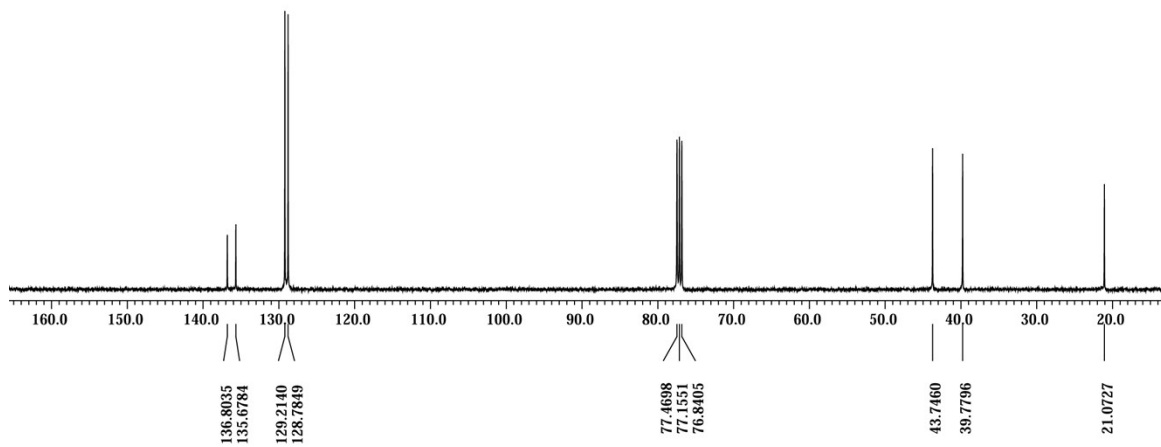

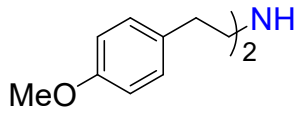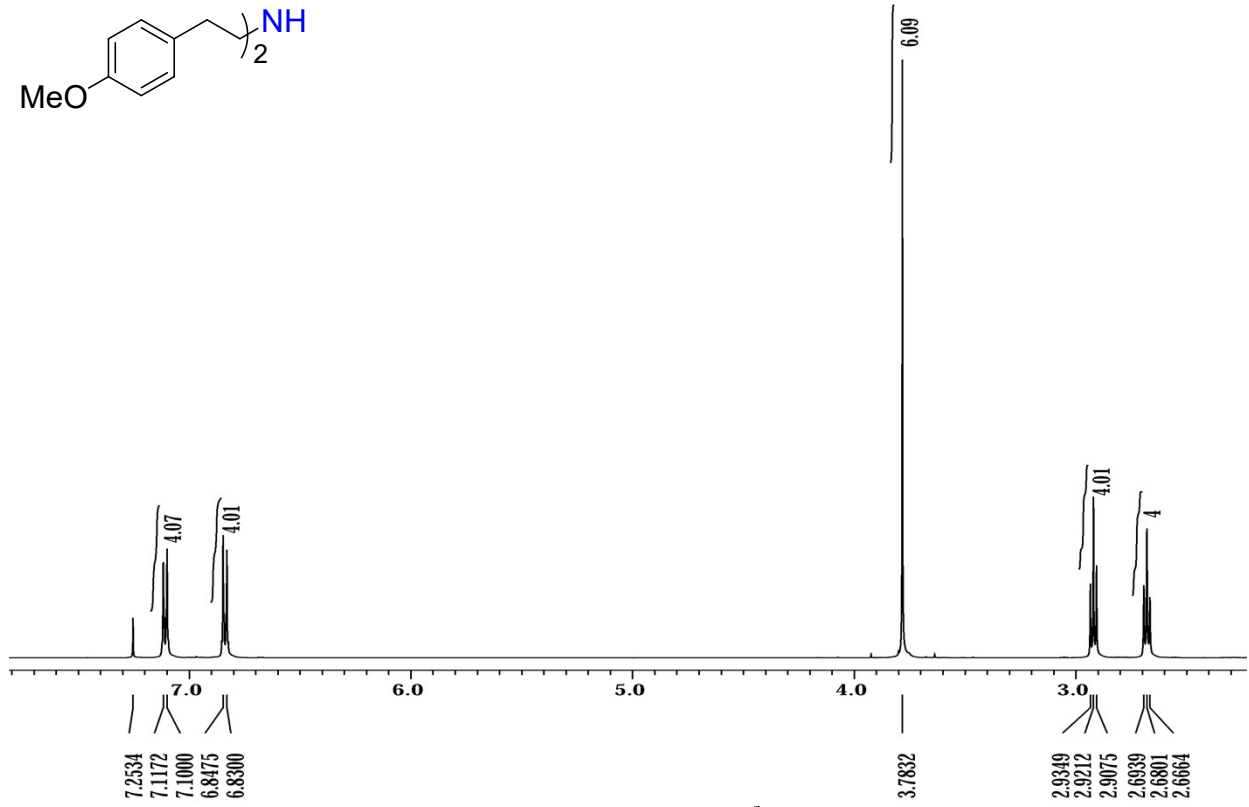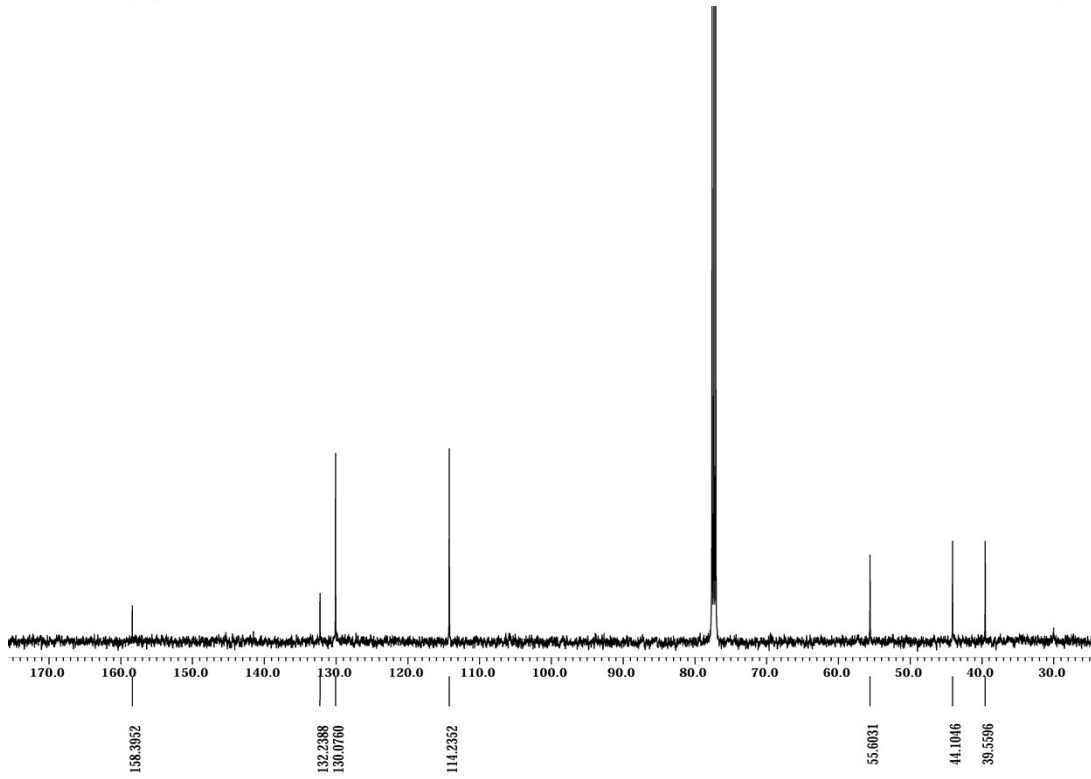

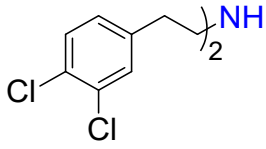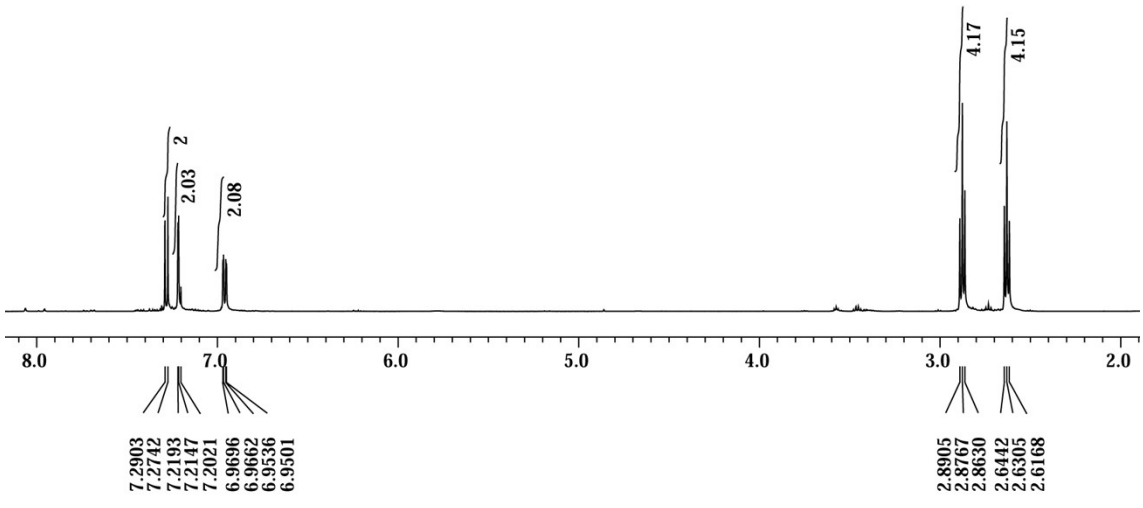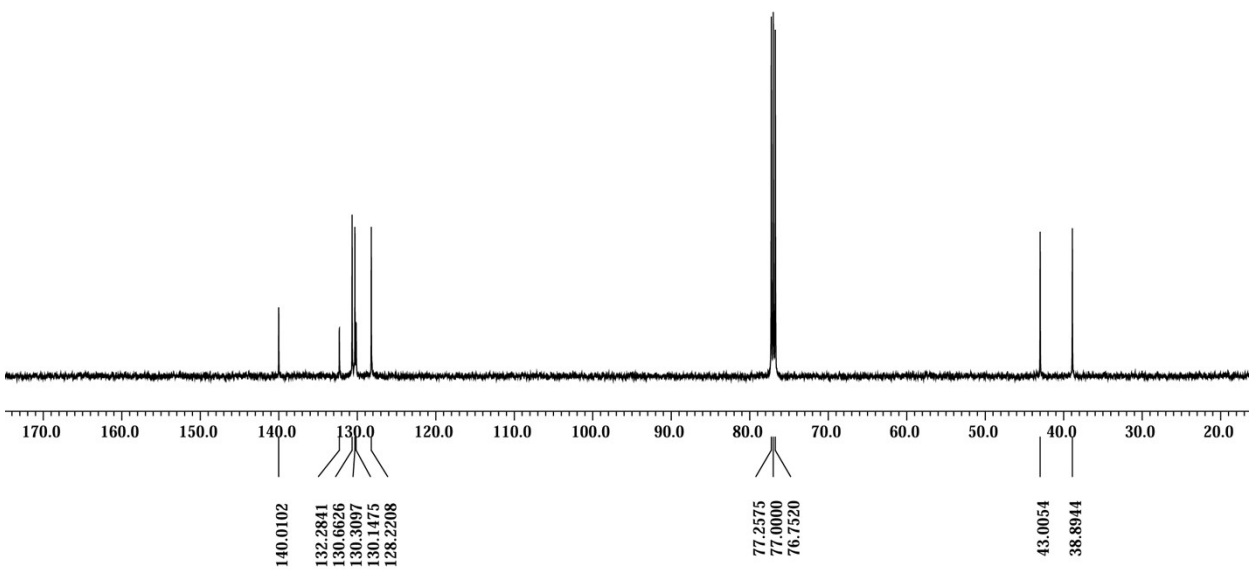

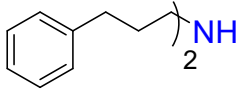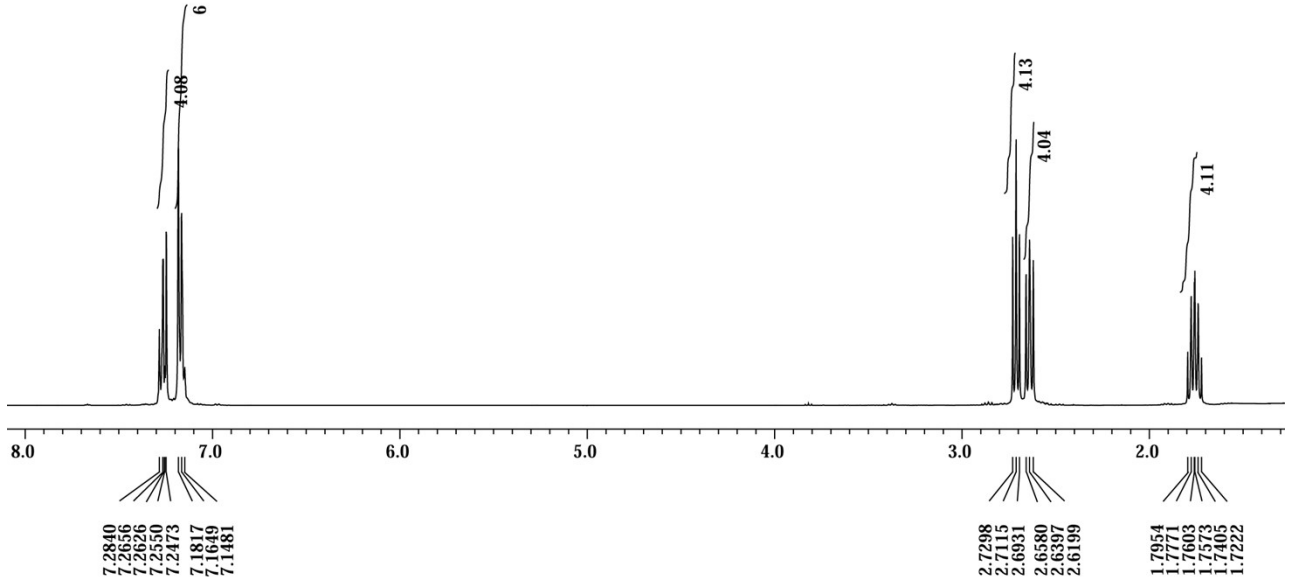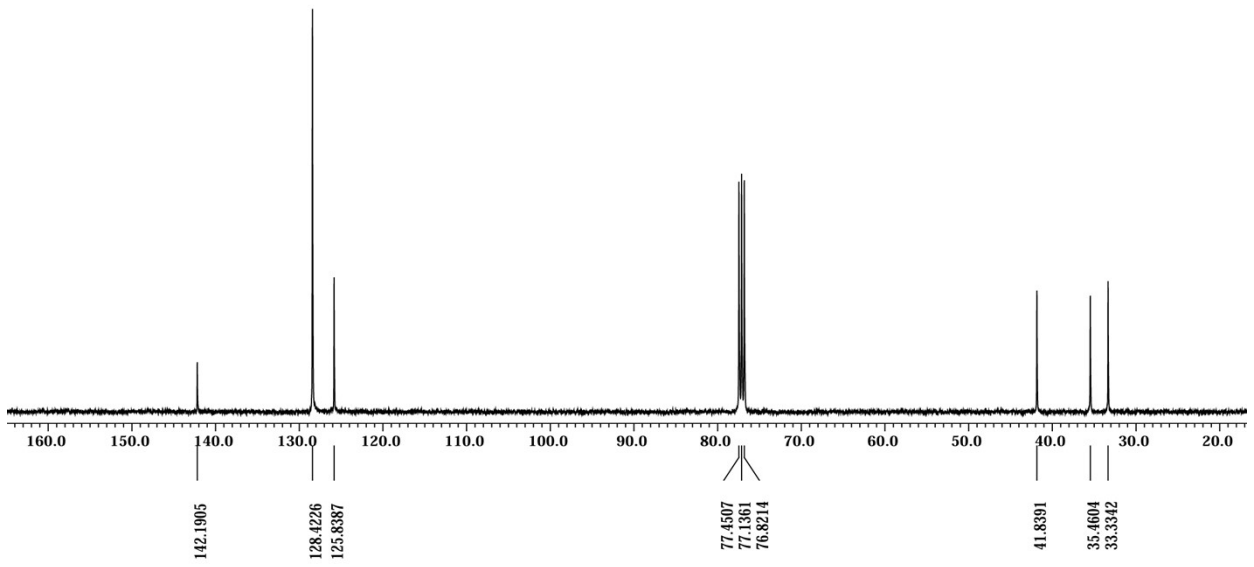

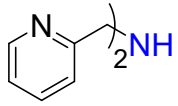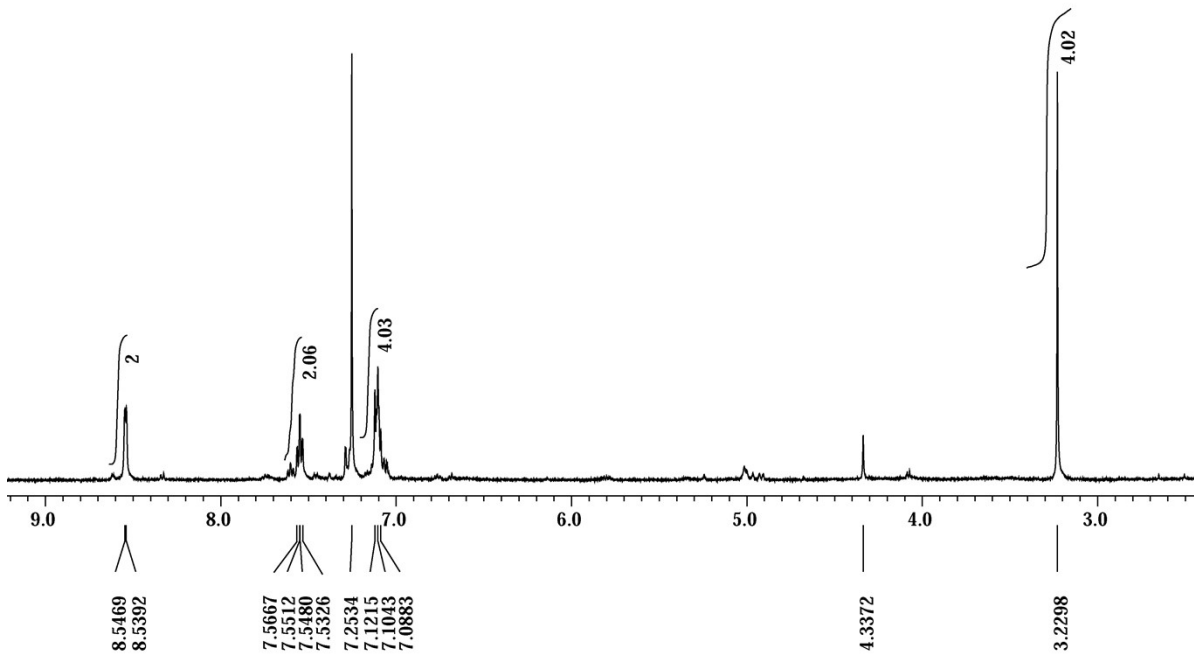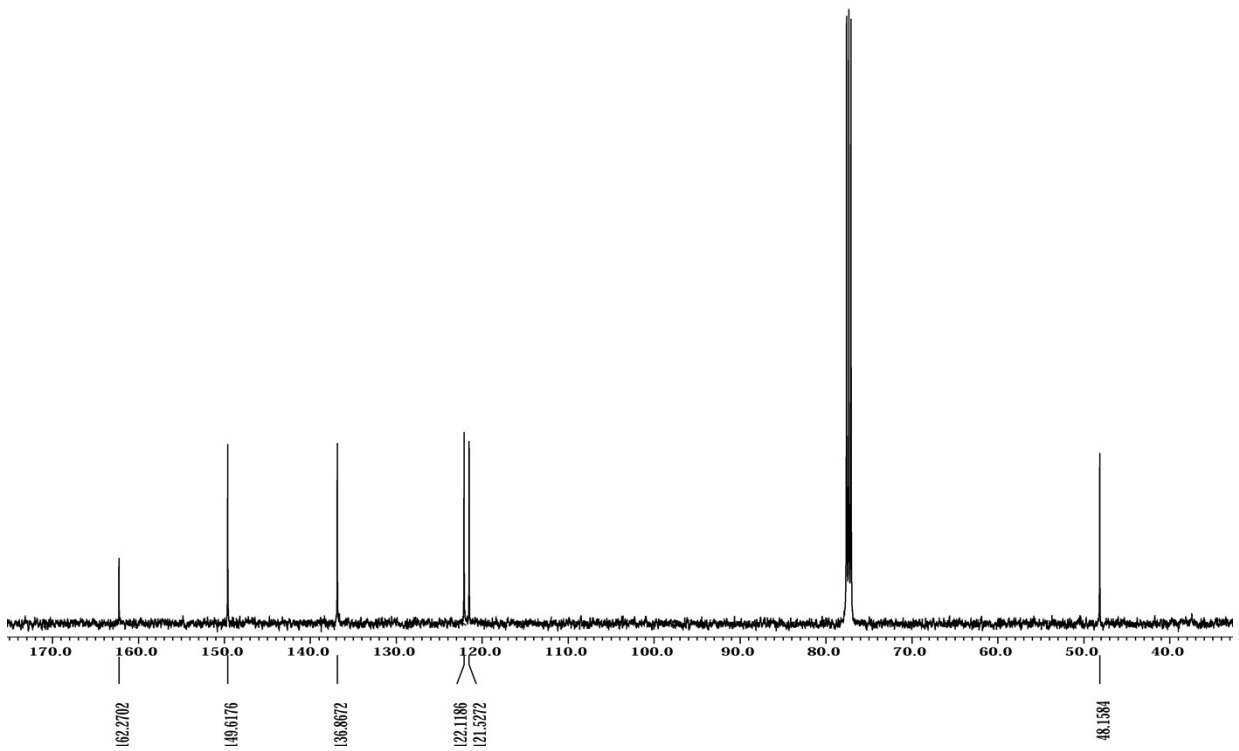

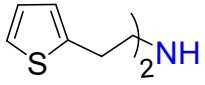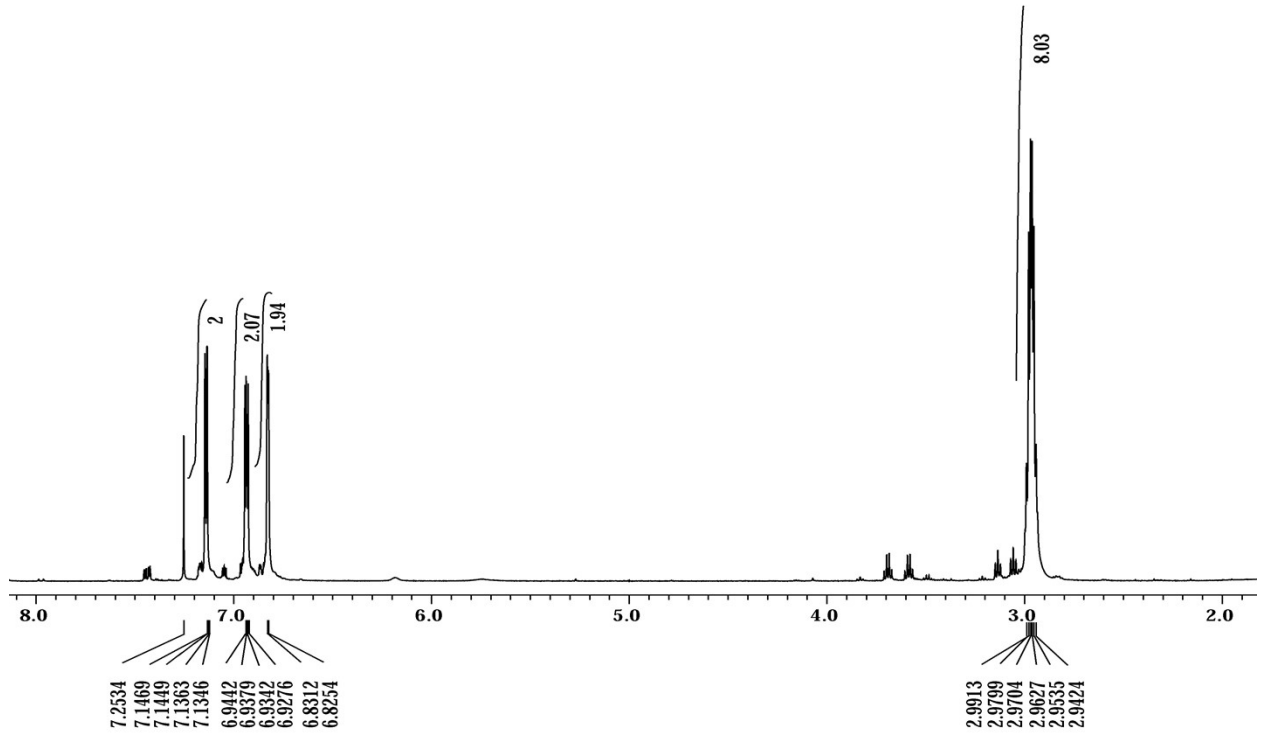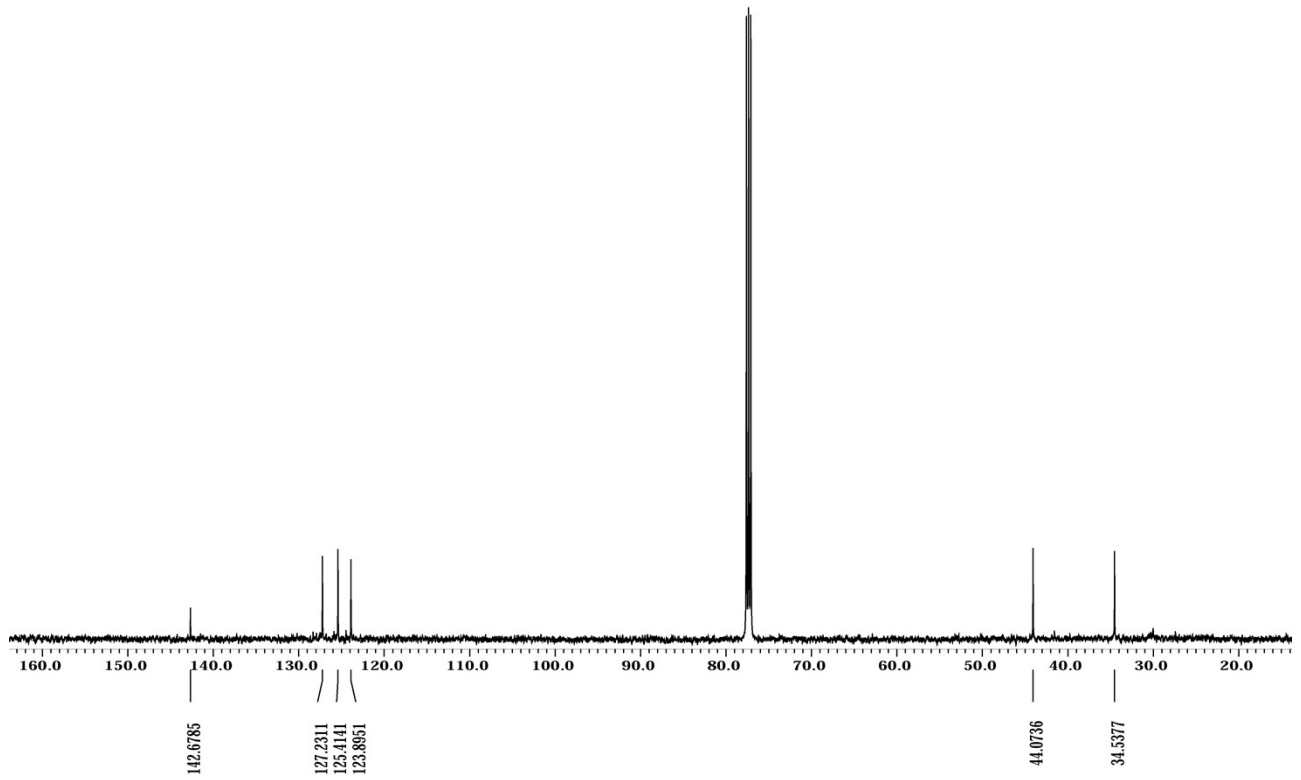

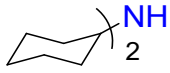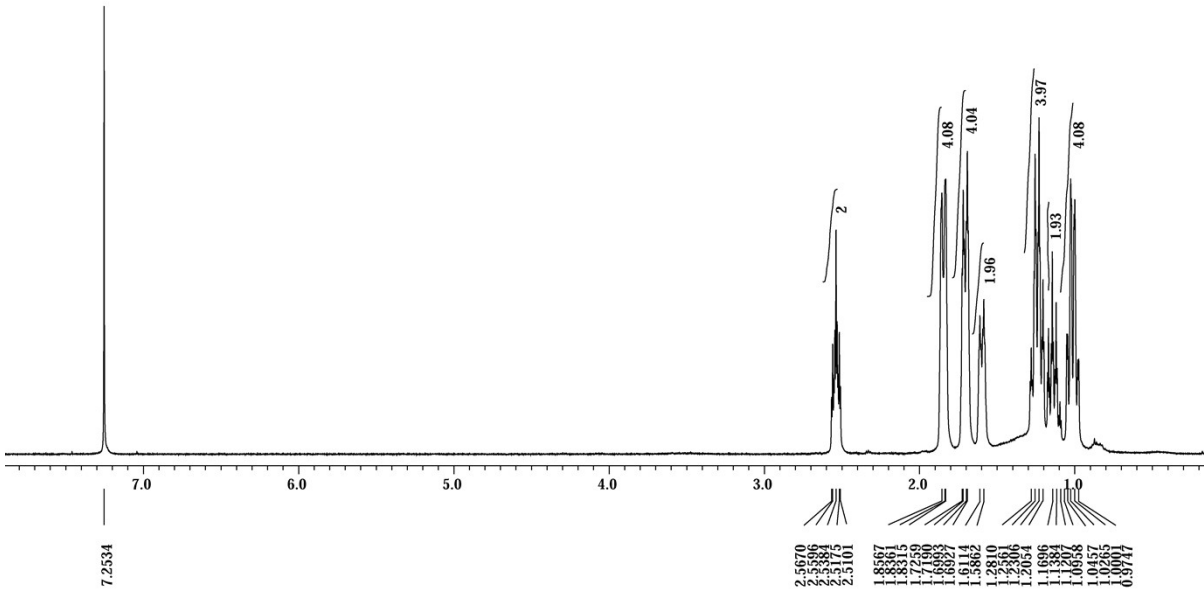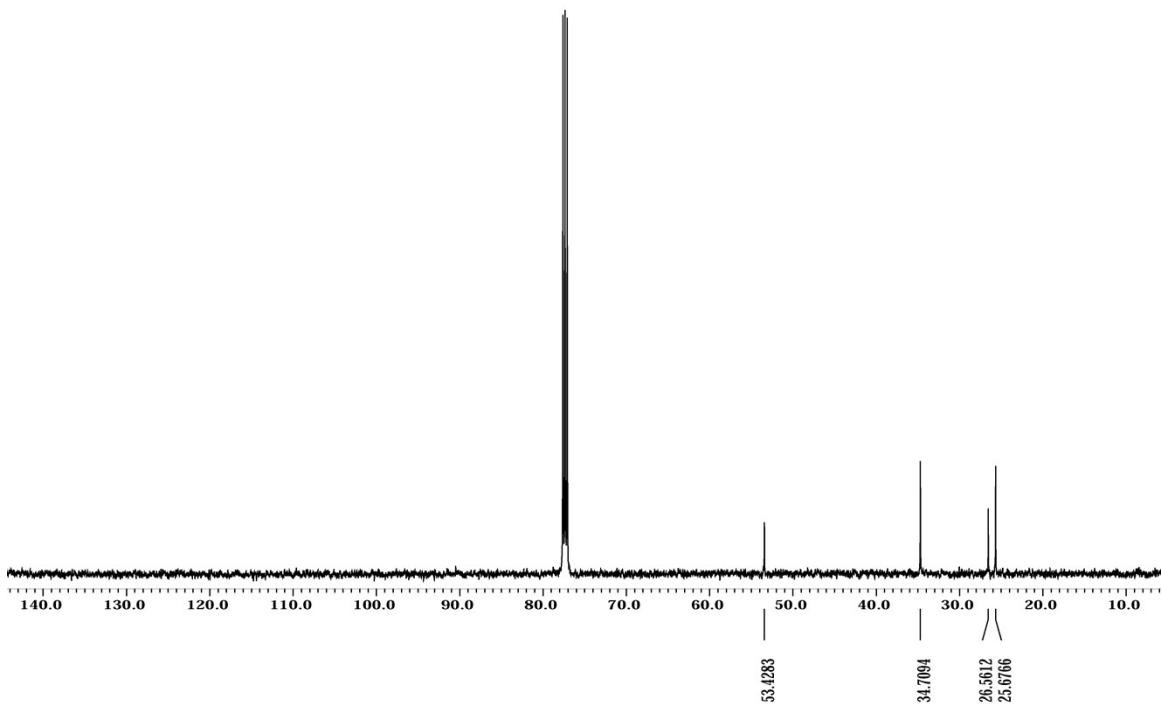

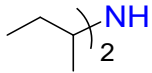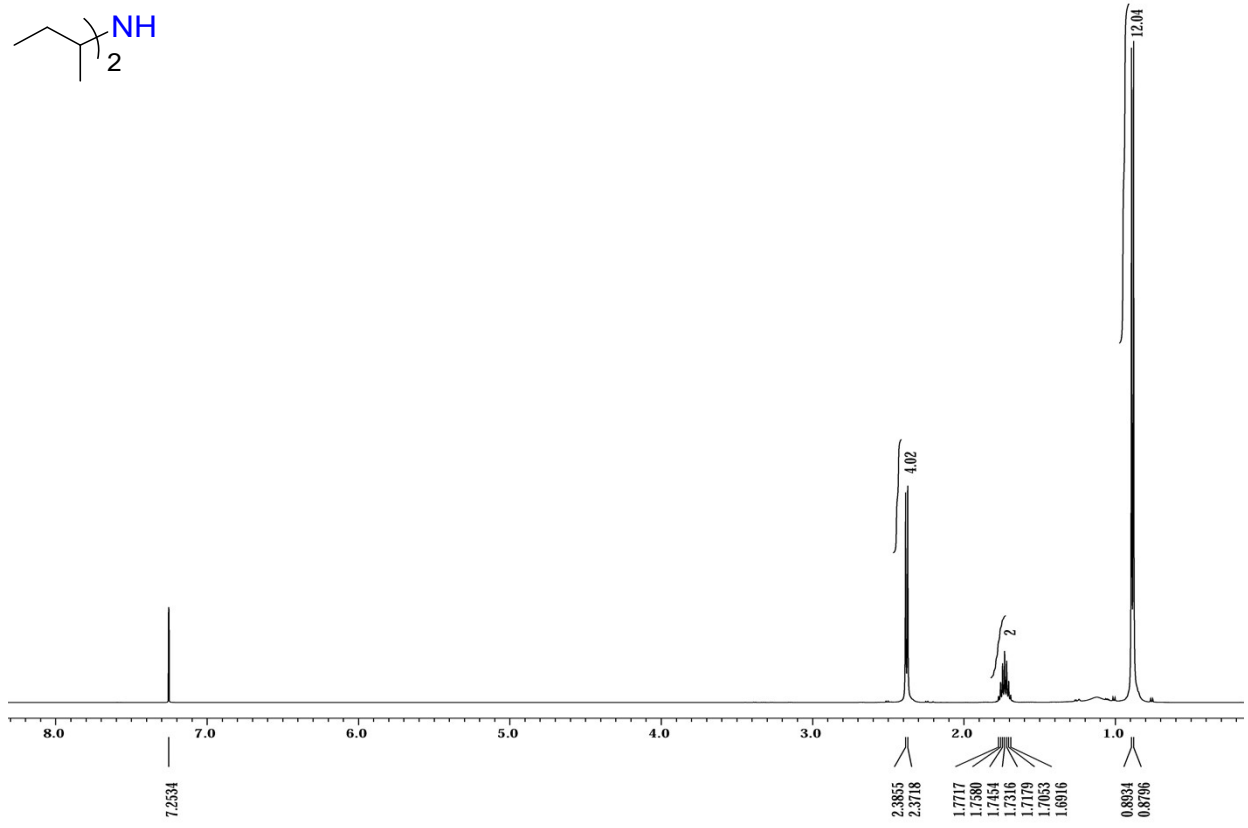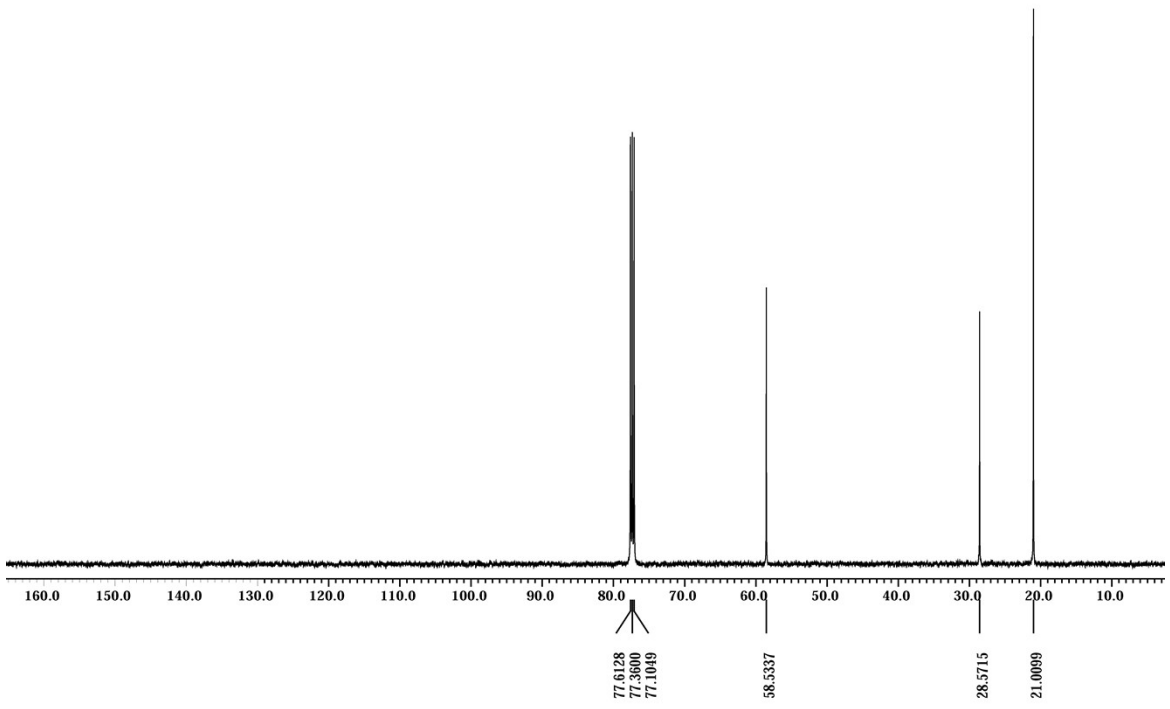

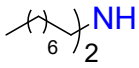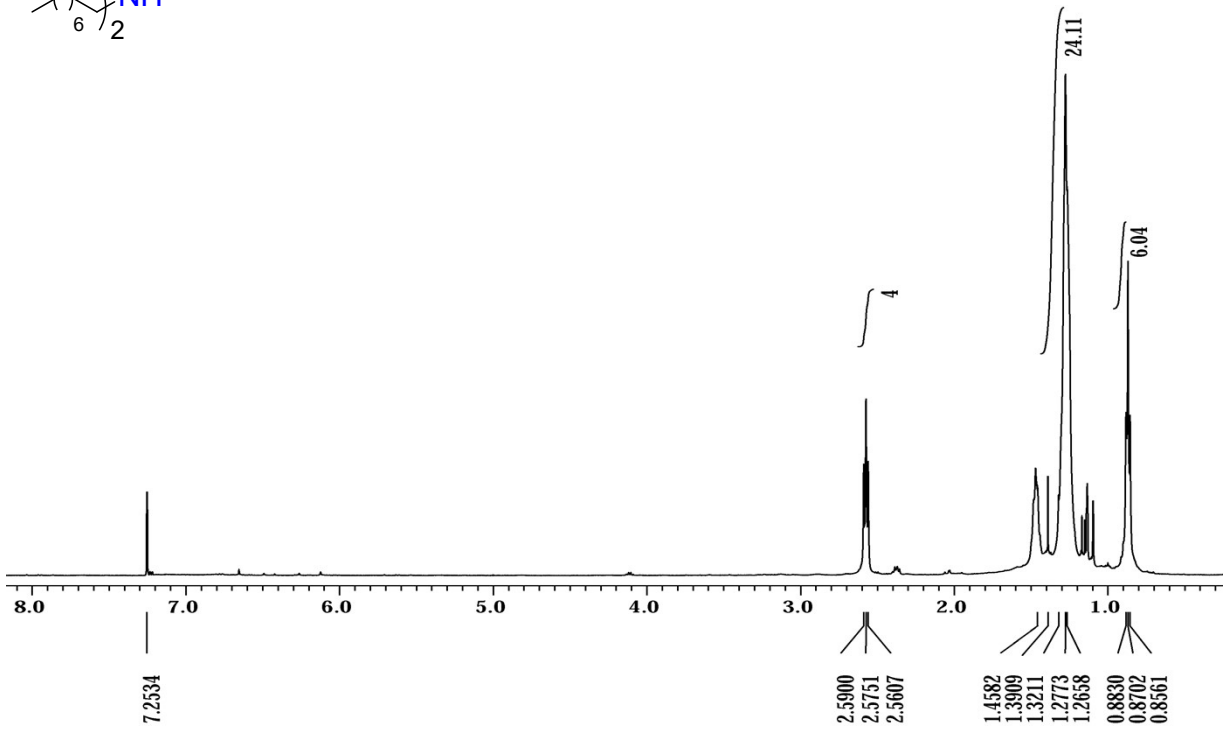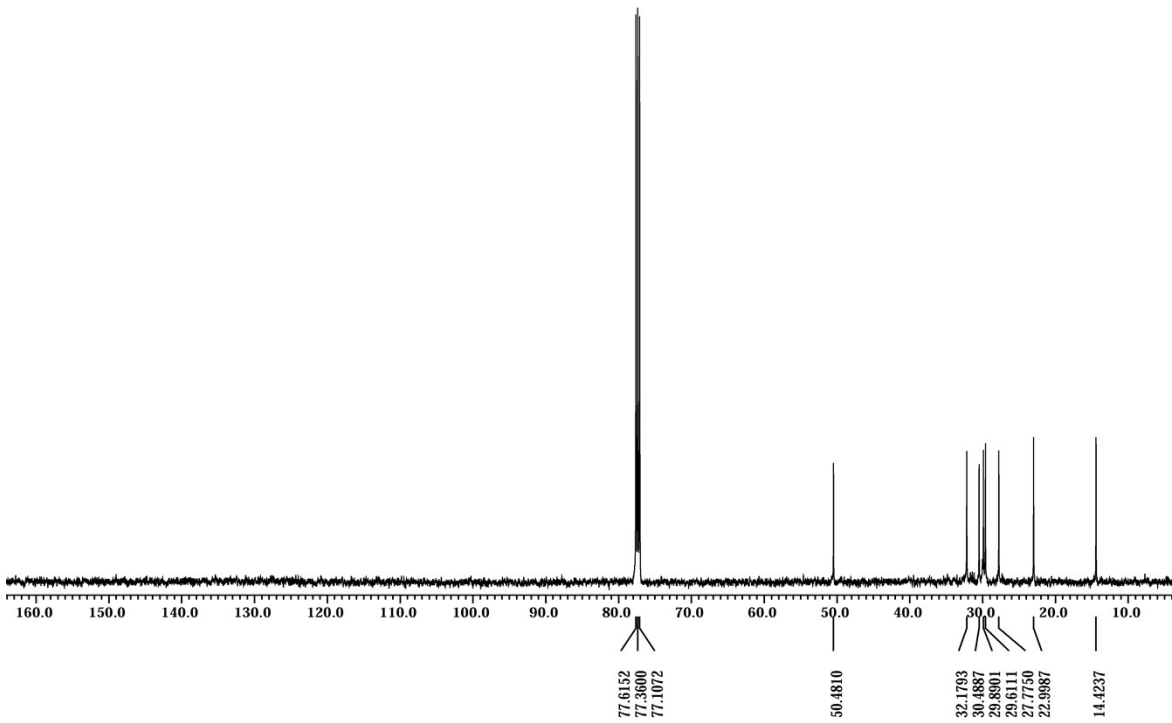

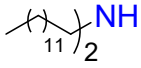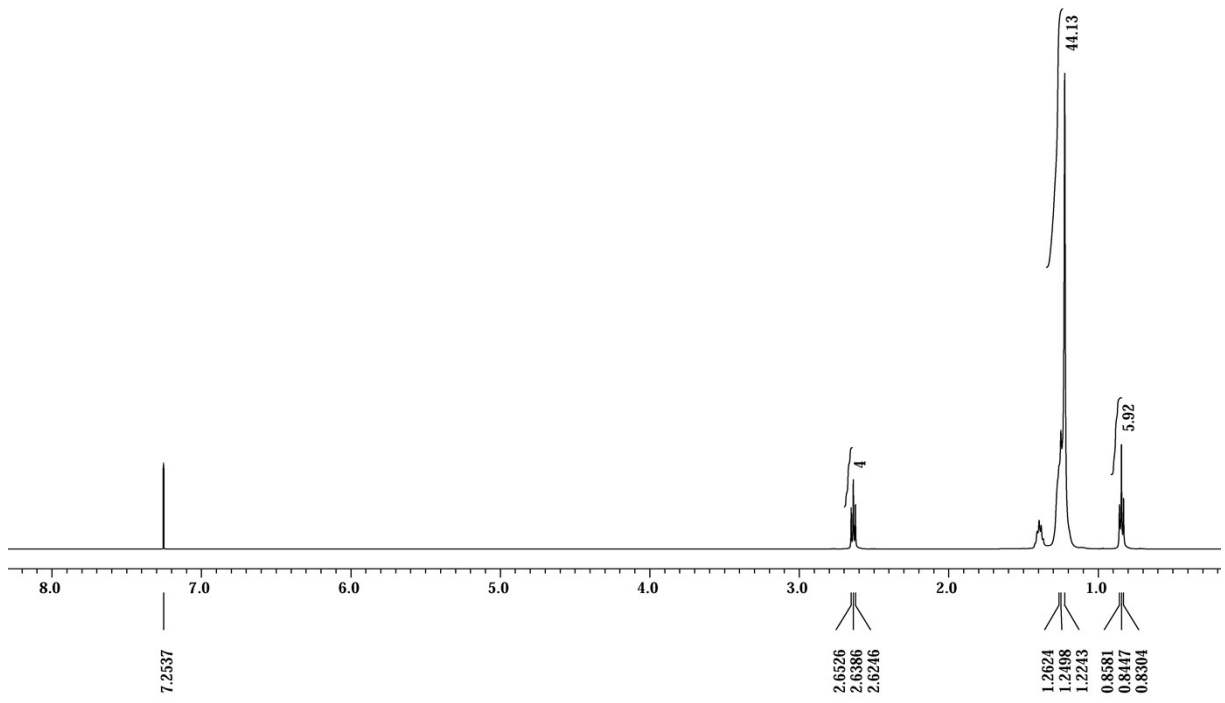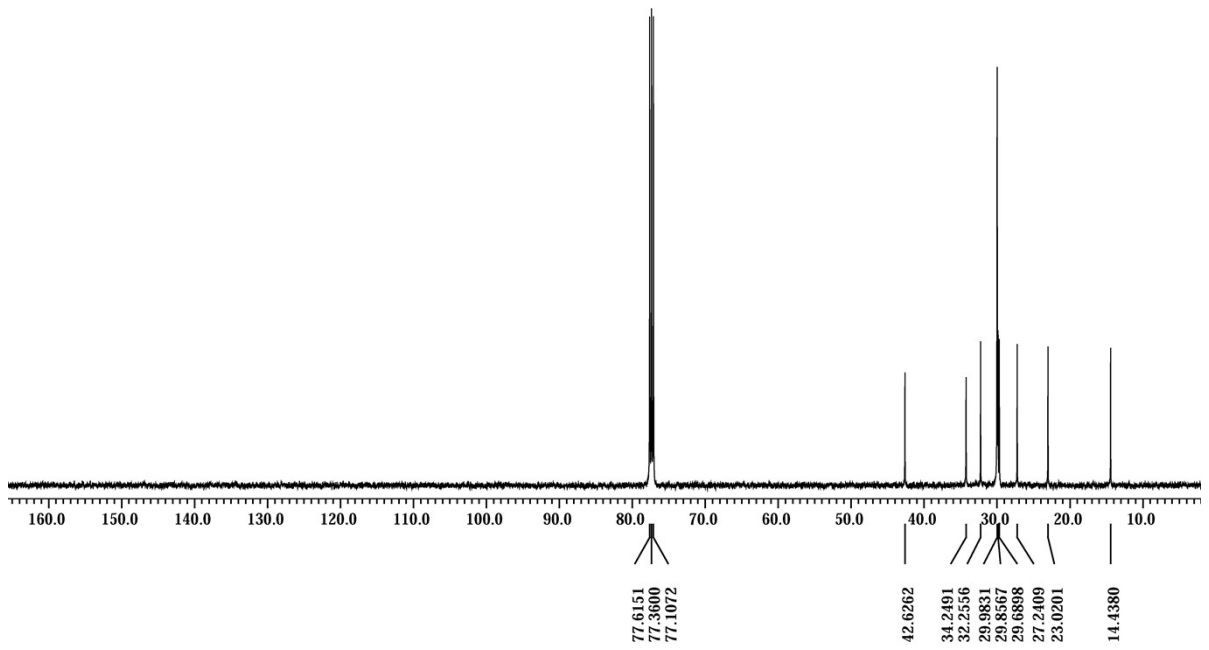

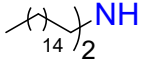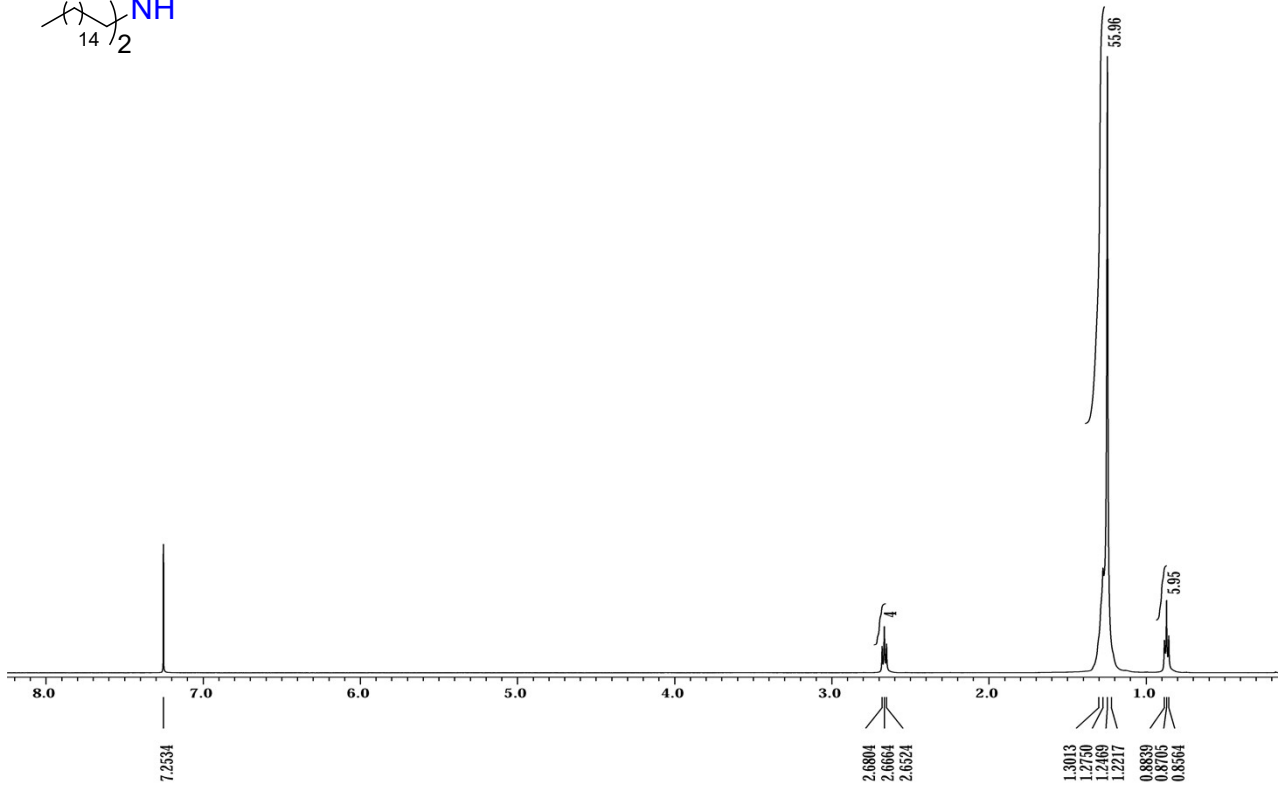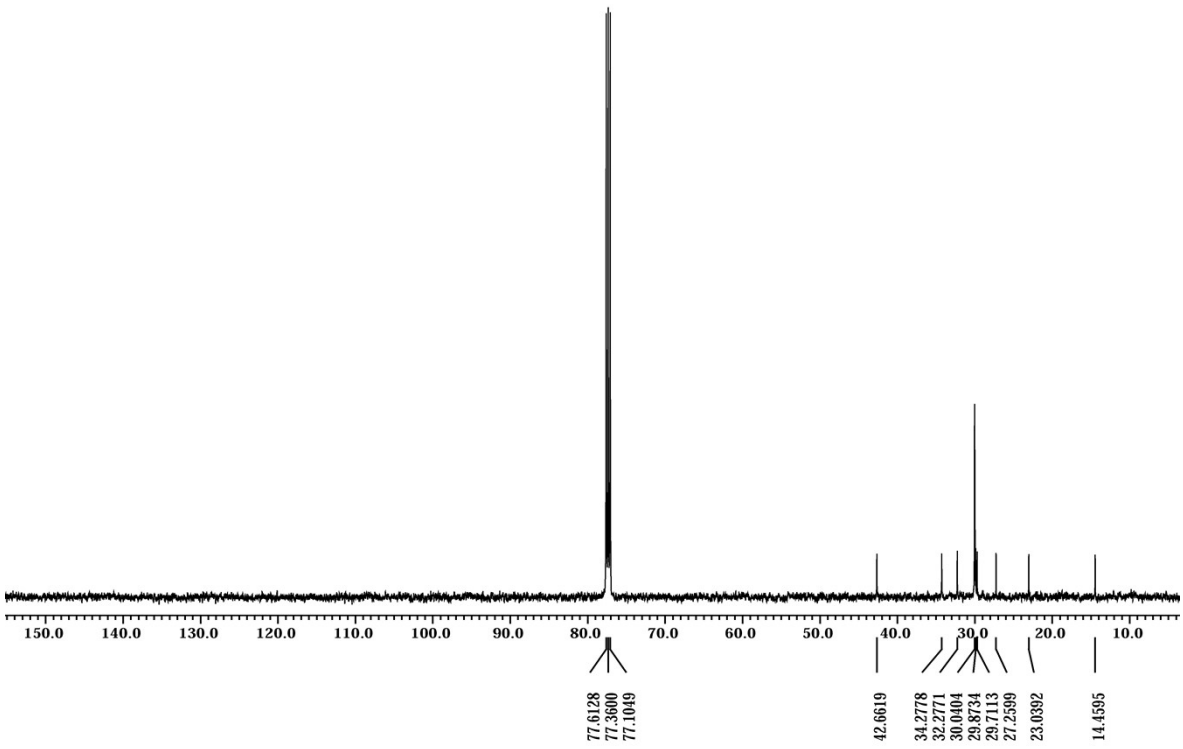

Supplement: d6dt00770h1.pdf [file d6dt00770h1.pdf]
